# Supplementary material for: CCEDRRN COVID-19 Infection Score (CCIS): development and validation in a Canadian cohort of a clinical risk score to predict SARS-CoV-2 infection in patients presenting to the emergency department with suspected COVID-19
Source: PubMed Central journal article supplement — BMJ Open. 2021 Dec 2;11(12):e055832. doi: 10.1136/bmjopen-2021-055832 (PMC8640195; doi:10.1136/bmjopen-2021-055832), 2021-12-02

## Appendices

**Appendix Table 1.** Patients enrolled by CCEDRRN site and time periods for data collection

| Site (N patients contributed)                    | Mar 2020    | Apr 2020    | May 2020    | Jun 2020    | Jul 2020    | Aug 2020    | Sept 2020   | Oct 2020   | Total        |
|--------------------------------------------------|-------------|-------------|-------------|-------------|-------------|-------------|-------------|------------|--------------|
| <b>Derivation Cohort</b>                         | <b>3217</b> | <b>4797</b> | <b>5493</b> | <b>3096</b> | <b>2232</b> | <b>1276</b> | <b>1266</b> | <b>366</b> | <b>21743</b> |
| Abbotsford Regional Hospital                     |             | 228         | 474         | 385         | 198         |             |             |            | 1285         |
| Eagle Ridge Hospital                             | 196         | 163         |             |             |             |             |             |            | 359          |
| Foothills, Calgary                               | 437         | 131         |             |             |             |             |             |            | 568          |
| Halifax Infirmary/Dalhousie, Nova Scotia         | 17          |             |             |             |             |             |             |            | 17           |
| Hants Community Hospital, Nova Scotia            | 1           |             |             |             |             |             |             |            | 1            |
| Hôpital du Sacré-Coeur de Montreal               | 27          | 96          | 401         |             |             |             |             |            | 524          |
| Hôtel-Dieu de Lévis                              | 1           | 19          | 246         |             |             |             |             |            | 266          |
| Jewish General Hospital                          | 754         | 959         | 93          |             |             |             |             |            | 1806         |
| Peter Lougheed Centre                            | 321         | 1119        | 1169        | 605         | 638         | 552         | 616         | 215        | 5235         |
| Royal Columbian Hospital                         | 236         | 408         | 366         |             |             |             |             |            | 1010         |
| Royal University, Saskatoon                      | 132         | 275         | 357         | 296         | 340         | 265         | 193         |            | 1858         |
| Saint John Regional Hospital, New Brunswick      | 98          | 102         |             |             |             |             |             |            | 200          |
| South Campus, Calgary                            | 367         | 598         | 612         | 526         | 586         | 459         | 457         | 151        | 3756         |
| Sunnybrook Health Sciences Centre                |             |             | 473         | 593         | 470         |             |             |            | 1536         |
| The Ottawa Hospital - Civic Campus               | 58          | 24          | 537         |             |             |             |             |            | 619          |
| Vancouver General Hospital                       | 572         | 675         | 765         | 691         |             |             |             |            | 2703         |
| <b>Validation Cohort</b>                         | <b>2082</b> | <b>2012</b> | <b>695</b>  | <b>381</b>  | <b>330</b>  |             | <b>422</b>  |            | <b>5922</b>  |
| Cobequid Community Health Centre                 | 6           |             |             |             |             |             |             |            | 6            |
| Dartmouth General College, Dartmouth Nova Scotia | 7           |             |             |             |             |             |             |            | 7            |
| Health Science North, Sudbury Ontario            |             |             | 295         | 381         | 330         |             |             |            | 1006         |

|                                                                          |     |     |     |  |  |  |     |  |      |
|--------------------------------------------------------------------------|-----|-----|-----|--|--|--|-----|--|------|
| Hôpital de l'Enfant-Jésus, CHU de Québec-Université Laval                | 40  | 99  | 26  |  |  |  |     |  | 165  |
| IUCPQ: Institut universitaire de cardiologie et de pneumologie de Québec | 4   | 5   | 95  |  |  |  |     |  | 104  |
| Lions Gate Hospital                                                      | 294 | 220 |     |  |  |  |     |  | 514  |
| Mount St Joseph's                                                        | 236 |     |     |  |  |  |     |  | 236  |
| Rockyview, Calgary                                                       | 368 | 104 |     |  |  |  |     |  | 472  |
| Saint Paul's Hospital                                                    | 541 |     |     |  |  |  |     |  | 541  |
| Saskatoon City Hospital, Saskatoon                                       | 33  | 53  |     |  |  |  |     |  | 86   |
| Secondary Assessment Centers of Dartmouth General and Halifax Infirmary  | 3   | 70  | 66  |  |  |  |     |  | 139  |
| St Paul's Hospital, Saskatoon                                            | 84  | 198 |     |  |  |  |     |  | 282  |
| Surrey Memorial Hospital                                                 | 404 | 927 |     |  |  |  |     |  | 1331 |
| The Ottawa Hospital - General Campus                                     | 62  | 33  | 135 |  |  |  |     |  | 230  |
| Toronto Western Hospital                                                 |     |     |     |  |  |  | 422 |  | 422  |
| University of Alberta Hospital                                           |     | 303 | 78  |  |  |  |     |  | 381  |

**Appendix Table 2.** Candidate variables for entry into regression model

| Variable                                      | Definition                                                                 | N (%)<br>Missing |
|-----------------------------------------------|----------------------------------------------------------------------------|------------------|
| <b>Demographics</b>                           |                                                                            |                  |
| Age                                           | Age in years                                                               | 0 (0)            |
| Sex                                           | Male, Female, Other                                                        | 0 (0)            |
| Arrival from                                  | Home + other (not clearly documented)                                      | 0 (0)            |
|                                               | Single room + no fixed address + shelter                                   | 0 (0)            |
|                                               | Institutional living: long-term care/rehab + correctional                  | 0 (0)            |
|                                               | Inter-hospital transfer                                                    | 0 (0)            |
| <b>Infection risk</b>                         |                                                                            |                  |
| Travel risk                                   | Travel from country with known cases within 14 days                        | 0 (0)            |
| Institutional exposure                        | Possible exposure in institutional setting (e. g., Long-term care, prison) | 0 (0)            |
| Healthcare worker                             | Healthcare worker/Microbiology lab employee                                | 0 (0)            |
| Household/caregiver contact                   | Household contact /caregiver of known positive case                        | 0 (0)            |
| No documented risk                            | Documented absence of risk factors                                         | 0 (0)            |
| <b>Emergency department variables</b>         |                                                                            |                  |
| ED arrival mode                               |                                                                            | 2 (0)            |
| Ambulance:                                    | arrived by ambulance                                                       |                  |
| Self/police                                   | self-transported or transported to ED by police                            |                  |
| Arrival heart rate                            | beats/minute                                                               | 452 (2.1)        |
| Arrival respiratory rate                      | breaths/minute                                                             | 732 (3.4)        |
| Arrival oxygen saturation                     | %                                                                          | 517 (2.4)        |
| Lowest recorded oxygen saturation in ED       | %                                                                          | 445 (2.0)        |
| Fever                                         |                                                                            | 847 (3.9)        |
| Temperature <36.0                             | Temperature <36.0C AND no self-reported fever                              |                  |
| Temperature 36.0-37.4                         | Temperature 36.0-37.4C AND no self-reported fever                          |                  |
| Temperature ≥37.5 or fever                    | Temperature ≥37.5 OR self-reported fever                                   |                  |
| Respiratory distress                          | Increased work of breathing documented by treating clinician               | 1(0)             |
| Supplemental oxygen delivered in the ED       | Yes/No                                                                     | 0 (0)            |
| <b>COVID symptoms</b>                         |                                                                            |                  |
| Abdominal pain                                | Patient-reported symptom as documented by treating clinician               | 0 (0)            |
| Altered consciousness/confusion               | Patient-reported symptom as documented by treating clinician               | 0 (0)            |
| Bleeding (hemorrhage)                         | Patient-reported symptom as documented by treating clinician               | 0 (0)            |
| Chest pain (includes discomfort or tightness) | Patient-reported symptom as documented by treating clinician               | 0 (0)            |
| Chills                                        | Patient-reported symptom as documented by treating clinician               | 0 (0)            |
| Conjunctivitis                                | Patient-reported symptom as documented by treating clinician               | 0 (0)            |
| Cough                                         | Patient-reported symptom as documented by treating clinician               | 0 (0)            |

|                                              |                                                                                                                                                                    |          |
|----------------------------------------------|--------------------------------------------------------------------------------------------------------------------------------------------------------------------|----------|
| Diarrhea                                     | Patient-reported symptom as documented by treating clinician                                                                                                       | 0 (0)    |
| Dizziness/Vertigo                            | Patient-reported symptom as documented by treating clinician                                                                                                       | 0 (0)    |
| Dysgeusia/anosmia                            | Patient-reported symptom as documented by treating clinician                                                                                                       | 0 (0)    |
| Ear pain                                     | Patient-reported symptom as documented by treating clinician                                                                                                       | 0 (0)    |
| Fatigue/malaise                              | Patient-reported symptom as documented by treating clinician                                                                                                       | 0 (0)    |
| Headache                                     | Patient-reported symptom as documented by treating clinician                                                                                                       | 0 (0)    |
| Hemoptysis (bloody sputum)                   | Patient-reported symptom as documented by treating clinician                                                                                                       | 0 (0)    |
| Joint pain (arthralgia)                      | Patient-reported symptom as documented by treating clinician                                                                                                       | 0 (0)    |
| Lymphadenopathy                              | Patient-reported symptom as documented by treating clinician                                                                                                       | 0 (0)    |
| Muscle aches (myalgia)                       | Patient-reported symptom as documented by treating clinician                                                                                                       | 0 (0)    |
| Nausea/vomiting                              | Patient-reported symptom as documented by treating clinician                                                                                                       | 0 (0)    |
| No reported symptoms                         | Patient-reported symptom as documented by treating clinician                                                                                                       | 0 (0)    |
| Runny nose (rhinorrhea)                      | Patient-reported symptom as documented by treating clinician                                                                                                       | 0 (0)    |
| Seizures                                     | Patient-reported symptom as documented by treating clinician                                                                                                       | 0 (0)    |
| Shortness of breath (dyspnea)                | Patient-reported symptom as documented by treating clinician                                                                                                       | 0 (0)    |
| Skin rash                                    | Patient-reported symptom as documented by treating clinician                                                                                                       | 0 (0)    |
| Sore throat                                  | Patient-reported symptom as documented by treating clinician                                                                                                       | 0 (0)    |
| Sputum production                            | Patient-reported symptom as documented by treating clinician                                                                                                       | 0 (0)    |
| Wheezing                                     | Patient-reported symptom as documented by treating clinician                                                                                                       | 0 (0)    |
| Current tobacco user                         | Documented current tobacco use                                                                                                                                     | 6 (0)    |
| Current illicit user                         | Documented methamphetamine, opioid or other illicit drug use                                                                                                       | 6 (0)    |
| <b>7-day average incident COVID-19 cases</b> | Daily reported incidence of new cases in health region, averaged over the seven days preceding hospital arrival. Reported in units of new cases/100,000 population | 32 (0.1) |

**Appendix Table 3.** Performance metrics for the CCEDRN COVID-19 Infection Score for ruling in or ruling out SARS-CoV-2 infection at different score cut-off values in the derivation cohort

| Score            | n (%)        | Sensitivity (%,<br>95% CI) | Specificity (%,<br>95% CI) | LR+   | LR-  | COVID+<br>n (%) |
|------------------|--------------|----------------------------|----------------------------|-------|------|-----------------|
| <b>Rule out:</b> |              |                            |                            |       |      |                 |
| ≤-2              | 51 (0.2)     | 100 (99.6–100)             | 0.25 (0.2–0.3)             | 1.0   | NA   | 0 (0)           |
| ≤-1              | 937 (4.3)    | 99.89 (99.4–100)           | 4.5 (4.2–4.8)              | 1.1   | <0.1 | 1 (0.1)         |
| ≤0               | 5996 (27.6)  | 96.6 (95.2–97.7)           | 28.67 (28.1–29.3)          | 1.4   | 0.1  | 32 (0.5)        |
| ≤1               | 13114 (60.3) | 86.6 (84.3–88.7)           | 62.43 (61.8–63.1)          | 2.3   | 0.2  | 126 (1.0)       |
| ≤2               | 18041 (83.0) | 67.34 (64.2–70.3)          | 85.25 (84.8–85.7)          | 4.6   | 0.4  | 307 (1.7)       |
| ≤3               | 20405 (93.9) | 45.11 (41.9–48.4)          | 95.61 (95.3–95.9)          | 10.3  | 0.6  | 516 (2.5)       |
| <b>Rule in:</b>  |              |                            |                            |       |      |                 |
| ≥3               | 3702 (17.0)  | 67.34 (64.2–70.3)          | 85.25 (84.8–85.7)          | 4.6   | 0.4  | 633 (17.1)      |
| ≥4               | 1338 (6.2)   | 45.11 (41.9–48.4)          | 95.61 (95.3–95.9)          | 10.3  | 0.6  | 424 (31.7)      |
| ≥5               | 440 (2.0)    | 23.51 (20.8–26.4)          | 98.95 (98.8–99.1)          | 22.3  | 0.8  | 221 (50.2)      |
| ≥6               | 122 (0.6)    | 9.68 (7.9–11.8)            | 99.85 (99.8–99.9)          | 65.0  | 0.9  | 91 (74.6)       |
| ≥7               | 31 (0.1)     | 2.77 (1.8–4.0)             | 99.98 (99.9–100.0)         | 115.1 | 1.0  | 26 (83.9)       |
| ≥8               | 12 (0.1)     | 1.17 (0.6–2.1)             | 100 (100.0–100.0)          | 243.4 | 1.0  | 11 (91.7)       |
| ≥9               | 2 (<0.1)     | 0.21 (<0.1–0.8)            | 100 (100.0–100.0)          | NA    | 1.0  | 2 (100)         |

LR+: Positive Likelihood Ratio; LR-: Negative Likelihood Ratio

**Appendix Table 4.** Performance metrics for CCEDRRN COVID Infection Score for ruling in or ruling out SARS-CoV-2 infection at different score cut-off values in the combined cohort

| Score cutoff     | n (%)        | Sensitivity (95% CI) | Specificity (95% CI) | LR+   | LR-  | COVID+ n (%) |
|------------------|--------------|----------------------|----------------------|-------|------|--------------|
| <b>Rule out:</b> |              |                      |                      |       |      |              |
| ≤-2              | 70 (0.3)     | 100 (99.7,100)       | 0.3 (0.2,0.3)        | 1     | 0    | 0 (0)        |
| ≤-1              | 1257 (4.5)   | 99.8 (99.4,100)      | 4.7 (4.5,5)          | 1.1   | <0.1 | 2 (0.2)      |
| ≤0               | 7872 (28.5)  | 96.1 (94.8,97.1)     | 29.5 (29.0,30.1)     | 1.4   | 0.1  | 46 (0.6)     |
| ≤1               | 16962 (61.3) | 85 (82.8,87.0)       | 63.4 (62.8,63.9)     | 2.3   | 0.2  | 175 (1.0)    |
| ≤2               | 23243 (84.0) | 64.8 (62.0,67.5)     | 86.2 (85.7,86.6)     | 4.7   | 0.4  | 411 (1.8)    |
| ≤3               | 26169 (94.6) | 40.3 (37.4,43.2)     | 96.1 (95.9,96.4)     | 10.4  | 0.6  | 697 (2.7)    |
| <b>Rule in:</b>  |              |                      |                      |       |      |              |
| ≥3               | 4422 (16.0)  | 64.8 (62.0,67.5)     | 86.2 (85.7,86.6)     | 4.7   | 0.4  | 756 (17.1)   |
| ≥4               | 1496 (5.4)   | 40.3 (37.4,43.2)     | 96.1 (95.9,96.4)     | 10.4  | 0.6  | 470 (31.4)   |
| ≥5               | 476 (1.7)    | 20.2 (18.0,22.6)     | 99.1 (99.0,99.2)     | 22.3  | 0.8  | 236 (49.6)   |
| ≥6               | 128 (0.5)    | 8 (6.5,9.7)          | 99.9 (99.8,99.9)     | 60.3  | 0.9  | 93 (72.7)    |
| ≥7               | 32 (0.1)     | 2.2 (1.5,3.2)        | 100 (100,100)        | 98.4  | 1.0  | 26 (81.3)    |
| ≥8               | 12 (<0.1)    | 0.9 (0.5,1.7)        | 100 (100,100)        | 249.8 | 1.0  | 11 (91.7)    |

LR+: Positive likelihood ratio; LR-: Negative likelihood ratio

**Appendix Table 5.** Performance metrics for the CORC score (race and ethnicity variables removed) for ruling in or ruling out SARS-CoV-2 infection at different score cut-off values in the combined cohort

| Score            | n (%)        | Sensitivity (95% CI) | Specificity (95% CI) | LR+   | LR-  | COVID+<br>n (%) |
|------------------|--------------|----------------------|----------------------|-------|------|-----------------|
| <b>Rule out:</b> |              |                      |                      |       |      |                 |
| ≤-2              | 202 (0.7)    | 99.9 (99.5–100)      | 0.8 (0.7–0.9)        | 1.01  | 0.11 | 1 (0.5)         |
| ≤-1              | 2715 (9.8)   | 97.4 (96.4–98.3)     | 10.1 (9.8–10.5)      | 1.08  | 0.25 | 30 (1.1)        |
| ≤0               | 9089 (32.9)  | 90.1 (88.2–91.7)     | 33.9 (33.3–34.4)     | 1.36  | 0.29 | 116 (1.3)       |
| ≤1               | 17582 (63.9) | 72.8 (70.2–75.4)     | 65.2 (64.6–65.7)     | 2.09  | 0.42 | 317 (1.8)       |
| ≤2               | 23421 (84.7) | 51.2 (48.3–54.1)     | 86.2 (85.8–86.7)     | 3.72  | 0.57 | 569 (2.4)       |
| ≤3               | 26224 (94.8) | 27.7 (25.1–30.3)     | 95.8 (95.5–96)       | 6.56  | 0.76 | 844 (3.2)       |
| <b>Rule in:</b>  |              |                      |                      |       |      |                 |
| ≥3               | 4244 (15.3)  | 51.2 (48.3–54.1)     | 86.2 (85.8–86.7)     | 3.72  | 0.57 | 598<br>(14.1)   |
| ≥4               | 1441 (5.2)   | 27.7 (25.1–30.3)     | 95.8 (95.5–96)       | 6.56  | 0.76 | 323<br>(22.4)   |
| ≥5               | 358 (1.3)    | 11.1 (9.3–13)        | 99.1 (99–99.2)       | 12.79 | 0.9  | 129<br>(36.0)   |
| ≥6               | 54 (0.2)     | 3.1 (2.2–4.2)        | 99.9 (99.9–100)      | 45.41 | 0.97 | 36 (66.7)       |

LR+: Positive likelihood ratio; LR-: Negative likelihood ratio

**Appendix Table 6.** Net Reclassification Improvement of the CCEDRRN COVID-19 Infection Score compared to the CORC Score (race and ethnicity variables removed)

| <b>Primary Outcome : Covid Positive</b> |               |                           |               |             |              |
|-----------------------------------------|---------------|---------------------------|---------------|-------------|--------------|
| <b>CORC risk category</b>               |               | <b>CCIS risk category</b> |               |             | <b>Total</b> |
|                                         |               | <b>Low</b>                | <b>Medium</b> | <b>High</b> |              |
|                                         | <b>Low</b>    | 12                        | 18            | 0           | 30           |
|                                         | <b>Medium</b> | 34                        | 539           | 241         | 814          |
|                                         | <b>High</b>   | 0                         | 94            | 229         | 323          |
|                                         | <b>Total</b>  | 46                        | 651           | 470         | 1167         |
| <b>Primary Outcome: Covid Negative</b>  |               |                           |               |             |              |
| <b>CORC risk category</b>               |               | <b>CCIS risk category</b> |               |             | <b>Total</b> |
|                                         |               | <b>Low</b>                | <b>Medium</b> | <b>High</b> |              |
|                                         | <b>Low</b>    | 1593                      | 1092          | 0           | 2685         |
|                                         | <b>Medium</b> | 6233                      | 15756         | 706         | 22695        |
|                                         | <b>High</b>   | 0                         | 798           | 320         | 1118         |
|                                         | <b>Total</b>  | 7826                      | 17646         | 1026        | 26498        |

| <b><u>COVID Positive</u></b>             |       | <b><u>COVID Negative</u></b>                 |       |
|------------------------------------------|-------|----------------------------------------------|-------|
| Number of outcomes                       | 1167  | Number of outcomes                           | 26498 |
| Correct reclassification                 | 259   | Correct reclassification                     | 7031  |
| Incorrect reclassification               | 128   | Incorrect reclassification                   | 1798  |
| Net reclassification                     | 131   | Net reclassification                         | 5233  |
| Net reclassification improvement (Event) | 0.112 | Net reclassification improvement (Non-event) | 0.197 |
| Total net reclassification improvement   |       |                                              | 0.310 |



**Appendix Figure 1. Receiver operating characteristic curves for the CCEDRRN COVID Infection Score (CCIS) and the CORC score (race and ethnicity variables removed) in the combined study cohort**

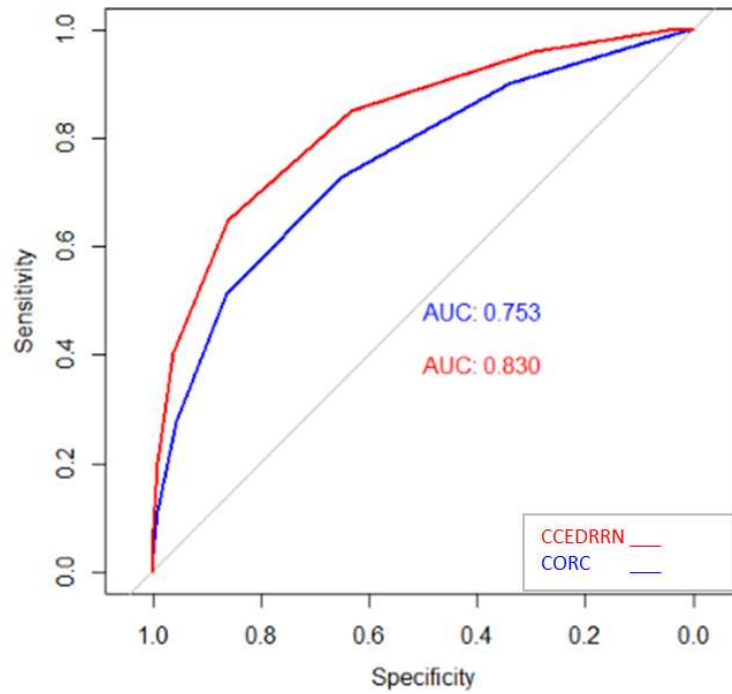

Supplement: bmjopen-2021-055832supp001.pdf [file bmjopen-2021-055832supp001.pdf]
