# Supplementary material for: CCEDRRN COVID-19 Infection Score (CCIS): development and validation in a Canadian cohort of a clinical risk score to predict SARS-CoV-2 infection in patients presenting to the emergency department with suspected COVID-19
Source: PubMed Central journal article supplement — BMJ Open. 2021 Dec 2;11(12):e055832. doi: 10.1136/bmjopen-2021-055832 (PMC8640195; doi:10.1136/bmjopen-2021-055832), 2021-12-02
Supplement: bmjopen-2021-055832.draft_revisions.pdf [file bmjopen-2021-055832.draft_revisions.pdf]

# BMJ Open

BMJ Open is committed to open peer review. As part of this commitment we make the peer review history of every article we publish publicly available.

When an article is published we post the peer reviewers' comments and the authors' responses online. We also post the versions of the paper that were used during peer review. These are the versions that the peer review comments apply to.

The versions of the paper that follow are the versions that were submitted during the peer review process. They are not the versions of record or the final published versions. They should not be cited or distributed as the published version of this manuscript.

BMJ Open is an open access journal and the full, final, typeset and author-corrected version of record of the manuscript is available on our site with no access controls, subscription charges or pay-per-view fees (<http://bmjopen.bmj.com>).

If you have any questions on BMJ Open's open peer review process please email [info.bmjopen@bmj.com](mailto:info.bmjopen@bmj.com)

# BMJ Open

## Development and validation of a clinical risk score to predict SARS-CoV-2 infection in emergency department patients: The CCEDRRN COVID-19 Infection Score (CCIS)

|                               |                                                                                                                                                                                                                                                                                                                                                                                                                                                                                                                                                                                                                                                                                                                                                                                                                                                                                                                                                                                                                                                                                                                                                                                                                                                                                                                                                                                                                                                                                       |
|-------------------------------|---------------------------------------------------------------------------------------------------------------------------------------------------------------------------------------------------------------------------------------------------------------------------------------------------------------------------------------------------------------------------------------------------------------------------------------------------------------------------------------------------------------------------------------------------------------------------------------------------------------------------------------------------------------------------------------------------------------------------------------------------------------------------------------------------------------------------------------------------------------------------------------------------------------------------------------------------------------------------------------------------------------------------------------------------------------------------------------------------------------------------------------------------------------------------------------------------------------------------------------------------------------------------------------------------------------------------------------------------------------------------------------------------------------------------------------------------------------------------------------|
| Journal:                      | <i>BMJ Open</i>                                                                                                                                                                                                                                                                                                                                                                                                                                                                                                                                                                                                                                                                                                                                                                                                                                                                                                                                                                                                                                                                                                                                                                                                                                                                                                                                                                                                                                                                       |
| Manuscript ID                 | bmjopen-2021-055832                                                                                                                                                                                                                                                                                                                                                                                                                                                                                                                                                                                                                                                                                                                                                                                                                                                                                                                                                                                                                                                                                                                                                                                                                                                                                                                                                                                                                                                                   |
| Article Type:                 | Original research                                                                                                                                                                                                                                                                                                                                                                                                                                                                                                                                                                                                                                                                                                                                                                                                                                                                                                                                                                                                                                                                                                                                                                                                                                                                                                                                                                                                                                                                     |
| Date Submitted by the Author: | 27-Jul-2021                                                                                                                                                                                                                                                                                                                                                                                                                                                                                                                                                                                                                                                                                                                                                                                                                                                                                                                                                                                                                                                                                                                                                                                                                                                                                                                                                                                                                                                                           |
| Complete List of Authors:     | McRae, Andrew; University of Calgary Cumming School of Medicine, Emergency Medicine<br>Hohl, Corinne M.; The University of British Columbia Faculty of Medicine, Emergency Medicine<br>Rosychuk, Rhonda; University of Alberta Faculty of Medicine & Dentistry, Paediatrics<br>Vatanpour, Shabnam; University of Calgary Cumming School of Medicine, Emergency Medicine<br>Ghaderi, Gelareh; The University of British Columbia Faculty of Medicine, Emergency Medicine<br>Archambault, Patrick M.; Universite Laval Faculte de medecine, Emergency Medicine<br>Brooks, Steven C.; Queen's University School of Medicine, Emergency Medicine<br>Cheng, Ivy; Sunnybrook Health Sciences Centre, Emergency Medicine<br>Davis, Philip; University of Saskatchewan College of Medicine, Emergency Medicine<br>Hayward, Jake; University of Alberta Faculty of Medicine & Dentistry, Emergency Medicine<br>Lang, Eddy; University of Calgary Cumming School of Medicine, Emergency Medicine<br>Ohle, Robert; Northern Ontario School of Medicine, Emergency Medicine<br>Rowe, Brian; University of Alberta Faculty of Medicine & Dentistry, Emergency Medicine<br>Welsford, Michelle; McMaster University Faculty of Health Sciences, Emergency Medicine<br>Yadav, Krishan; University of Ottawa Faculty of Medicine, Emergency Medicine<br>Morrison, Laurie J.; St Michael's Hospital, Emergency Medicine<br>Perry, Jeffrey; University of Ottawa Faculty of Medicine, Emergency Medicine |
| Keywords:                     | COVID-19, ACCIDENT & EMERGENCY MEDICINE, EPIDEMIOLOGY                                                                                                                                                                                                                                                                                                                                                                                                                                                                                                                                                                                                                                                                                                                                                                                                                                                                                                                                                                                                                                                                                                                                                                                                                                                                                                                                                                                                                                 |

1  
2  
3  
4  
5  
6  
7  
8  
9  
10  
11  
12  
13  
14  
15  
16  
17  
18  
19  
20  
21  
22  
23  
24  
25  
26  
27  
28  
29  
30  
31  
32  
33  
34  
35  
36  
37  
38  
39  
40  
41  
42  
43  
44  
45  
46  
47  
48  
49  
50  
51  
52  
53  
54  
55  
56  
57  
58  
59  
60

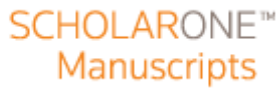

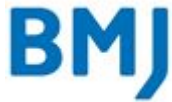

I, the Submitting Author has the right to grant and does grant on behalf of all authors of the Work (as defined in the below author licence), an exclusive licence and/or a non-exclusive licence for contributions from authors who are: i) UK Crown employees; ii) where BMJ has agreed a CC-BY licence shall apply, and/or iii) in accordance with the terms applicable for US Federal Government officers or employees acting as part of their official duties; on a worldwide, perpetual, irrevocable, royalty-free basis to BMJ Publishing Group Ltd ("BMJ") its licensees and where the relevant Journal is co-owned by BMJ to the co-owners of the Journal, to publish the Work in this journal and any other BMJ products and to exploit all rights, as set out in our [licence](#).

The Submitting Author accepts and understands that any supply made under these terms is made by BMJ to the Submitting Author unless you are acting as an employee on behalf of your employer or a postgraduate student of an affiliated institution which is paying any applicable article publishing charge ("APC") for Open Access articles. Where the Submitting Author wishes to make the Work available on an Open Access basis (and intends to pay the relevant APC), the terms of reuse of such Open Access shall be governed by a Creative Commons licence – details of these licences and which [Creative Commons](#) licence will apply to this Work are set out in our licence referred to above.

Other than as permitted in any relevant BMJ Author's Self Archiving Policies, I confirm this Work has not been accepted for publication elsewhere, is not being considered for publication elsewhere and does not duplicate material already published. I confirm all authors consent to publication of this Work and authorise the granting of this licence.

## Development and validation of a clinical risk score to predict SARS-CoV-2 infection in emergency department patients: The CCEDRRN COVID-19 Infection Score (CCIS)

Andrew D McRae, MD<sup>1</sup> & Corinne M Hohl, MD<sup>2</sup> (co-first authors), Rhonda J Rosychuk, PhD<sup>3</sup>, Shabnam Vatanpour, PhD<sup>1</sup>, Gelareh Ghaderi, MSc<sup>2</sup>, Patrick M Archambault, MD<sup>4</sup>, Steven C Brooks, MD<sup>5</sup>, Ivy Cheng, MD<sup>6</sup>, Philip Davis, MD<sup>7</sup>, Jake Hayward, MD<sup>8</sup>, Eddy S Lang, MD<sup>2</sup>, Robert Ohle, MD<sup>9</sup>, Brian H. Rowe, MD<sup>8</sup>, Michelle Welsford, MD<sup>10</sup>, Krishan Yadav, MD<sup>11</sup>, Laurie J Morrison, MD\*<sup>12</sup> Jeffrey J. Perry, MD\*<sup>11</sup>, and the Canadian COVID-19 Emergency Department Rapid Response Network (CCEDRRN) investigators for the Network of Canadian Emergency Researchers and the Canadian Critical Care Trials Group.

1. Departments of Emergency Medicine and Community Health Sciences, University of Calgary, Foothills Medical Center, 1403 29 St NW, Calgary AB T2N 0K8
2. Department of Emergency Medicine, University of British Columbia, 2775 Laurel St, Vancouver BC, V5Z 1M9
3. Department of Paediatrics, University of Alberta, 11405 87 Avenue NW, Edmonton AB T6G 1C9
4. Department of Family Medicine and Emergency Medicine, Université Laval, Pavillion Ferdinand-Vandry Local 4617, Québec QC, G1V 0A6
5. Department of Emergency Medicine, Queen's University, 76 Stuart St, Kingston ON, K7L 2V7
6. Division of Emergency Medicine, University of Toronto, 6 Queen's Park Cres W, Toronto Ontario, M5S 3H2
7. Department of Emergency Medicine, University of Saskatchewan, 107 Wiggins Rd, Saskatoon SK, S7N 5E5
8. Department of Emergency Medicine, University of Alberta, 8440 112 St NW, Edmonton AB, T6G 2R7
9. Department of Emergency Medicine, Northern Ontario School of Medicine, 41 Ramsey Lake Rd, Sudbury ON, P3E 5J1
10. Division of Emergency Medicine, McMaster University, 100 Main St W, Hamilton ON, L8P 1H6
11. Department of Emergency Medicine, University of Ottawa, 1053 Carling Ave, Ottawa ON, K1Y 4E9
12. Rescu, Li Ka Shing Knowledge Institute, Department of Emergency Medicine, St Michael's Hospital, Unity Health Toronto, 30 Bond St., Toronto ON M5B 1W8.

**\*co-senior author**

### Corresponding Author:

Andrew D. McRae  
Department of Emergency Medicine  
Rm C231 Foothills Medical Centre  
1403 29 St NW. Calgary, AB, Canada. T2N 2T9  
[Amcrae@ucalgary.ca](mailto:Amcrae@ucalgary.ca)  
Tel. (403) 210-8835

1  
2  
3 **Abstract** (283/300 words)  
4

5 **Objectives:** To develop and validate a clinical risk score that can accurately quantify an  
6 emergency department patient's probability of SARS-CoV-2 infection without the need for  
7 laboratory testing  
8

9 **Design:** Cohort study of participants in the Canadian COVID-19 Emergency Department Rapid  
10 Response Network (CCEDRRN) registry. Regression models were fitted to predict a positive  
11 SARS-CoV-2 test result using clinical and demographic predictors, as well as an indicator of  
12 local SARS-CoV-2 incidence.  
13  
14

15 **Setting:** 32 emergency departments in eight Canadian provinces  
16

17 **Participants:** 27,665 consecutively-enrolled patients who were tested for SARS-CoV-2 in  
18 participating emergency departments between March 1-October 30,2020  
19

20 **Main outcome measures:** Positive SARS-CoV-2 nucleic acid test result within 14 days of an  
21 index emergency department encounter for suspected COVID-19 disease  
22

23 **Results:** We derived a 10-item CCEDRRN COVID-19 Infection Score using data from 21,743  
24 patients. This score included variables from history and physical examination, and an indicator  
25 of local disease incidence. The score had a c-statistic of 0.838 with excellent calibration. We  
26 externally validated the rule in 5,295 patients. The score maintained excellent discrimination and  
27 calibration, and had superior performance compared to another previously published risk score.  
28 Score cutoffs were identified that can rule-in or rule-out SARS-CoV-2 infection without the need  
29 for nucleic acid testing with 97.4 % sensitivity (95% CI 96.4–98.3) and 95.9% specificity (95%  
30 CI 95.5-96.0).  
31  
32

33 **Conclusions** The CCEDRRN COVID-19 Infection Score uses clinical characteristics and  
34 publicly available indicators of disease incidence to quantify a patient's probability of SARS-  
35 CoV-2 infection. The score can identify patients at sufficiently high risk of SARS-CoV-2  
36 infection to warrant isolation and empiric therapy prior to test confirmation, while also  
37 identifying patients at sufficiently low risk of infection that they may not need testing.  
38  
39

40 **Trial registration:** CCEDRRN is registered at [clinicaltrials.gov](https://clinicaltrials.gov) (NCT04702945).  
41

42 **Funding:** The network is funded by the Canadian Institutes of Health Research (447679), BC  
43 Academic Health Science Network Society, BioTalent Canada, Genome BC  
44 (COV024; VAC007), Ontario Ministry of Colleges and Universities (C-655-  
45 2129), the Saskatchewan Health Research Foundation (5357) and the Fondation CHU de  
46 Québec (Octroi #4007). These organizations are not-for-profit, and had no role in study conduct,  
47 analysis, or manuscript preparation.  
48  
49  
50  
51  
52  
53  
54  
55  
56  
57  
58  
59  
60

## Summary Box

### *What is already known on this topic*

- Most existing risk scores for identifying patients with high probability of SARS-CoV-2 infection include laboratory or diagnostic imaging results in addition to clinical variables and employ machine learning approaches that would require an advanced electronic medical record for implementation.
- The only risk prediction tool limited to clinical variables was derived in a population with a high proportion of SARS-CoV-2-positive patients, and is thus vulnerable to selection bias. This risk score also included three race or ethnicity variables, which may limit its generalizability outside of the population in which it was developed.

### *What this study adds*

- We have derived and validated a user-friendly 10-item risk prediction tool that uses clinical variables available at the time of a patient's initial presentation. Our tool accurately excludes COVID-19 infection in one-third of patients and accurately rules in COVID-19 infection in high-risk patients.
- Patients classified as low-risk need not be tested, which is advantageous in settings where resources are limited. Patients classified as high-risk can be prioritized for rapid testing, isolation and/or early initiation of empiric therapy prior to the availability of COVID-19 test results.
- This risk score is generalizable across geographic settings and does not require diagnostic tests or advanced electronic decision support for implementation.

### *Strengths and Limitations*

- Large cohort of consecutive eligible patients from a large, geographically distributed network of Canadian urban, regional, and rural emergency departments. Strict data quality protocols and data cleaning protocols ensured the reliability of collected data.
- In addition to clinical variables, we also included the average daily incidence of SARS-CoV-2 infections in a patient's health region, which is an essential predictor of the probability of a patient's risk of COVID infection.
- Some missing data required either multiple imputation or classification of missing categorical variables as being absent. The overall missingness of data in this registry is very low.
- Although the data collection for the CCEDRRN registry relies on abstraction from health records, this approach has been shown to be reliable in our study sites when compared to prospective data collection.
- This risk score was developed using data from patients enrolled in the first nine months of the pandemic when rates of influenza were low. As such, the score may need to be re-validated and refined in the future to reflect the influence of influenza, the emergence of variant strains of SARS-CoV-2, and widespread population immunization on patients' risk of infection.



## MAIN DOCUMENT (3054 words)

### Introduction

To date, the World Health Organization has reported 190 million diagnosed cases of coronavirus 2019 disease (COVID-19) with 4.2 million fatalities.<sup>1</sup> Despite the availability of vaccines to prevent COVID-19, incomplete population-level immunization and the emergence of variants means that hospitals around the world need to continue to identify and isolate patients with suspected COVID-19 from the time they arrive in the emergency department until their SARS-CoV-2 test results are available. In acutely ill patients, clinicians may need to initiate empiric therapy immediately. A quantitative risk score that can accurately predict the probability of a positive SARS-CoV-2 test result would guide initial isolation and empiric therapy prior to nucleic acid amplification test (NAAT) test result availability, while identifying patients with sufficiently low probability of COVID-19 who may not require testing or isolation.

Many risk prediction tools have been developed to predict the probability of SARS-CoV-2 infection.<sup>2-14</sup> A living systematic review of these models concluded that most were generated using poor methodological approaches and none were ready for widespread use.<sup>2</sup> Most published risk prediction tools included early laboratory or imaging findings, thus precluding their utility to guide immediate isolation and clinical decisions at the time of first clinical contact. Other risk prediction tools using machine learning included laboratory and imaging results and can only be implemented in hospitals using electronic health records with integrated decision support. None of these models accounted for the prevalence of COVID-19 disease in the local population, which is an important risk predictor, and most only included patients from the early stages of the pandemic.<sup>2</sup>

1  
2  
3 The objective of this study is to develop a clinical risk score to predict the probability of a  
4 positive SARS-CoV-2 nucleic acid test in a large, generalizable population of emergency  
5 department patients using only clinical characteristics and indicators of local SARS-CoV-2  
6 incidence. This risk score is intended to guide SARS-CoV-2 testing, isolation, and empiric  
7 therapy decisions without relying on other laboratory testing or diagnostic imaging. This score  
8 could be invaluable in settings that may not have access to adequate resources for timely SARS-  
9 CoV-2 testing.  
10  
11  
12  
13  
14  
15  
16  
17  
18  
19

## 20 **Methods**

21  
22 This analysis uses data from the Canadian COVID-19 Emergency Department Rapid Response  
23 Network (CCEDRRN, pronounced “SED-rin”). CCEDRRN is an ongoing multicenter, pan-  
24 Canadian registry that has been enrolling consecutive emergency department patients with  
25 suspected COVID-19 disease in hospitals in eight of ten Canadian provinces since March 1,  
26 2020.<sup>15</sup> Information on the network, including detailed methods and participating sites, is  
27 available elsewhere.<sup>15</sup> This study follows the methodological and reporting recommendations  
28 outlined in the Transparency in reporting of a multivariable prediction model for individual  
29 diagnosis and prognosis (TRIPOD) criteria.<sup>16</sup> The CCEDRRN network protocol was approved  
30 by the research ethics boards of all participating institutions with a waiver of informed consent  
31 for data collection and linkage.  
32  
33  
34  
35  
36  
37  
38  
39  
40  
41  
42  
43  
44  
45

46 The CCEDRRN data collection form includes prespecified demographic and social variables,  
47 vital signs, symptoms, and comorbid conditions (derived from the International Severe Acute  
48 Respiratory and Emerging Infection Consortium (ISARIC) reporting form),<sup>17,18</sup> exposure risk  
49 variables, hospital laboratory and diagnostic imaging test results, SARS-CoV-2 NAAT results,  
50 and patient outcomes. Data were abstracted at each site using electronic medical record  
51  
52  
53  
54  
55  
56  
57  
58  
59  
60

1  
2  
3 extraction where available as well as manual review of either electronic or paper charts  
4  
5 (depending on site-specific documentation practices) by trained research assistants who were  
6  
7 blinded to the potential predictor variables at the time of data collection. Reliability of health  
8  
9 record data abstraction was evaluated by comparison with prospective data collection in a sample  
10  
11 of patients and found to be reliable.<sup>15</sup>  
12  
13  
14

15 Each consecutive, eligible patient enrolled in the registry was assigned a CCEDRRN unique  
16  
17 identifier. Trained research assistants entered anonymized participant data into a REDCap  
18  
19 database (Version 10.9.4; Vanderbilt University, Nashville, Tennessee, USA). Regular data  
20  
21 quality checks including verification of extreme or outlying values were performed by each  
22  
23 participating site, coordinated by the CCEDRRN coordinating center.  
24  
25  
26

### 27 *Participants*

28  
29  
30 We included data from consecutive patients presenting to 32 CCEDRRN sites that collected data  
31  
32 on all patients tested for SARS-CoV-2 (Appendix Table 1). We included consecutive eligible  
33  
34 patients aged 18 and older who had a biological sample (swab, endotracheal aspirate,  
35  
36 bronchoalveolar lavage) specimen collected for NAAT on their index emergency department  
37  
38 visit or, if admitted, within 24h of emergency department arrival. For patients with multiple  
39  
40 emergency department encounters involving COVID-19 testing, we only used the first encounter  
41  
42 in this analysis.  
43  
44  
45

46  
47 We excluded patients who had a positive SARS-CoV-2 NAAT within 14 days prior to their  
48  
49 emergency department visit, patients with cardiac arrest prior to emergency department arrival,  
50  
51 and those with missing outcome data.  
52  
53

### 54 *Predictors*

1  
2  
3 Candidate predictors were chosen based on clinical consensus and availability within the  
4 CCEDRRN registry. Predictors included known risk factors for SARS-CoV-2 infection,  
5  
6 including work as a healthcare provider, institutional living (i.e., long term care, prison), close  
7  
8 personal or household contacts with SARS-CoV-2 infection; symptoms including cough,  
9  
10 anosmia or dysgeusia, fever, myalgias and vital signs on emergency department arrival. The full  
11  
12 list of candidate variables, and their definitions are available in the supplementary appendix  
13  
14 (Appendix Table 2).  
15  
16  
17  
18  
19

20 In addition to these clinical variables, the seven-day average incident COVID-19 case count was  
21  
22 calculated for the health region of each participating site using publicly available  
23  
24 epidemiological data.<sup>19</sup> For each calendar day within each health region represented in the study,  
25  
26 we calculated the average daily incident rate of new infections per 100,000 population over the  
27  
28 preceding seven days. This seven-day average incidence was assigned to each patient based on  
29  
30 the date of their index emergency department encounter and the health region of the forward  
31  
32 sortation area of their postal code of residence. For patients with no fixed address, we allocated  
33  
34 them to the health region of the hospital in which they were tested. As publicly available incident  
35  
36 COVID-19 case data were not available for the early pandemic, we imputed values for the first  
37  
38 five weeks of the pandemic by modeling the reported COVID-19 cases that had accumulated in  
39  
40 every health region over time using linear interpolation (0.1% missing).  
41  
42  
43  
44  
45

### 46 *Outcome*

47  
48 The primary outcome of this analysis was the diagnosis of SARS-CoV-2 infection using a  
49  
50 criterion standard of a positive NAAT at the time of index emergency department visit or within  
51  
52 14 days after the index encounter.  
53  
54

### 55 *Sample size and precision*

1  
2  
3 The 46 candidate predictors had 52 degrees of freedom and with an expected SARS-CoV-2  
4 infection rate of 5%, a sample size of 1040 was sufficient for the derivation cohort based on an  
5 anticipated event rate of less than 20% and a requirement for 20 outcomes per degree of  
6 freedom.<sup>20</sup> Over 21,000 patients were available for the derivation cohort at the time of analysis,  
7 providing more than sufficient data for reliable prediction modeling.  
8  
9

### 15 *Model development and validation*

17 We randomly assigned study sites to the derivation and validation cohorts with the goal of  
18 assigning 75% of eligible patients and outcome events to the derivation cohort and 25% to the  
19 validation cohort. Thus, the derivation and validation cohorts are geographically distinct. Within  
20 the derivation cohort, candidate predictors were examined for co-linearity and missing or  
21 extreme values. In the presence of co-linearity, one predictor was dropped from the set of  
22 candidate predictors. Five multiple imputations were used for continuous variables with missing  
23 data. Patients with missing data for categorical variables were assumed to have the reference  
24 value for that categorical variable. The initial logistic regression model considered all candidate  
25 predictors, with continuous predictors fit with restricted cubic splines with three knots. The  
26 strengths of associations between predictors and outcome were assessed using an analysis of  
27 variance (ANOVA) plot to inform the degrees of freedom to allocate to each predictor. The  
28 model was fit again with these changes. A fast step-down procedure reduced the model to key  
29 predictors based on an Akaike's information criterion stopping rule with a threshold of 120 to  
30 enable a model with a relatively small number of predictors that would be clinically easy to use.  
31 Internal bootstrap validation with 1,000 bootstrap samples was conducted to provide an  
32 optimism-corrected C-statistic. Continuous predictors were categorized based on the relationship  
33 between the spline function and outcome.  
34  
35  
36  
37  
38  
39  
40  
41  
42  
43  
44  
45  
46  
47  
48  
49  
50  
51  
52  
53  
54  
55  
56  
57  
58  
59  
60

1  
2  
3 We then developed the points-based CCEDRRN COVID-19 Infection Score (CCIS) using a  
4 nomogram to assign integer point values for each variable included in the derived model.

5  
6  
7 Discrimination of the score was evaluated using the C-statistic. Calibration was evaluated using  
8 calibration curves and comparison of observed and expected outcomes. Diagnostic performance  
9 was evaluated using sensitivity and specificity, predictive values, and likelihood ratios at  
10 different point thresholds.  
11  
12  
13  
14  
15

16  
17 We then evaluated the discrimination, calibration, and performance characteristics of the CCIS  
18 in an external validation cohort of patients from geographically distinct study sites who were not  
19 part of the derivation cohort.  
20  
21  
22  
23

#### 24 25 *Validation of previously published models*

26  
27 We used our combined (derivation and validation) study cohort to externally validate the COvid  
28 Rule out Criteria (CORC) score developed by Kline et al (with race and ethnicity variables  
29 removed).<sup>3</sup> We compared measures of discrimination and calibration, along with sensitivity and  
30 specificity of risk score values for the CCIS and CORC (with race and ethnicity variables  
31 removed). We split each score into categories of low, moderate, and high-risk for SARS-CoV-2  
32 infection. Low risk was defined as a score having a sensitivity for ruling-out infection of 95% or  
33 higher. High-risk was defined as a score having a specificity for ruling in infection of 95% or  
34 higher. We compared the performance of the two scores by calculating net reclassification  
35 improvement across low, moderate, and high-risk categories.<sup>21,22</sup>  
36  
37  
38  
39  
40  
41  
42  
43  
44  
45  
46  
47  
48

49 All analyses were performed in R<sup>23</sup> using the rms package.<sup>24</sup>  
50

#### 51 52 *Role of the funding sources*

53  
54  
55  
56  
57  
58  
59  
60

1  
2  
3 The funding organizations had no role in the study conduct, data analysis, manuscript  
4 preparation or submission.  
5  
6

### 7 8 *Patient involvement* 9

10  
11 The CCEDRRN governance structure includes patient representatives on the Executive  
12 Committee, Scientific Steering Committee, Protocol Review and Publications Committee, Data  
13 Access and Monitoring Committee and Knowledge Translation Committee. The network also  
14 has a Patient Engagement Committee composed of patient partners from across Canada. Patient  
15 partners provided input into study design and selection of outcomes for all CCEDRRN analyses,  
16 and provide advice on knowledge sharing and translation strategies.  
17  
18  
19  
20  
21  
22  
23  
24  
25

### 26 **Results** 27

28 This analysis is based on 27,665 consecutively enrolled patients from 32 participating emergency  
29 departments (Figure 1, Appendix Table 1). Sites and enrolment periods contributing patient data  
30 are shown in the supplementary appendix. Of the included patients, 1,677 (4.2%) had a positive  
31 SARS-CoV-2 NAAT result.  
32  
33  
34  
35  
36  
37

38 The study cohort was subdivided into a derivation cohort (21,743 patients from 16 sites, 940  
39 (4.3%) SARS-CoV-2 positive) and a separate external validation cohort (5,922 patients from 16  
40 different sites, 227 (3.8%) SARS-CoV-2 positive). Demographic and clinical characteristics of  
41 the derivation and validation cohorts are shown in Table 1. No continuous variable requiring  
42 multiple imputation had more than 3.4% missingness (Appendix Table 2).  
43  
44  
45  
46  
47  
48  
49

50 In the derivation cohort, we derived a 10-variable model to predict the probability of a patient  
51 having a positive SARS-CoV-2 NAAT. The regression coefficients and odds ratios for each  
52  
53  
54  
55  
56  
57  
58  
59  
60

1  
2  
3 variable in the model are shown in Table 2. The C-statistic for the derived model was 0.851 with  
4  
5 excellent calibration.  
6

7  
8 We created a points-based CCEDRRN COVID-19 Infection Score (CCIS) using rounded  
9  
10 regression coefficients with a range of negative two to nine points (Table 2). The C-statistic of  
11  
12 the CCIS in the derivation cohort was 0.838 (0.824–0.852) with excellent calibration (Figure 2).  
13

14  
15 A score of zero or less ruled out a positive SARS-CoV-2 test result in 5,996/21,743 patients  
16  
17 (27.6%) with a sensitivity of 96.6% (95% CI 95.2–97.7). A score of four or more was observed  
18  
19 in 1,338/21,743 patients (6.2%) and had a specificity of 95.6 (95% CI 95.3–95.8) for predicting a  
20  
21 positive SARS-CoV-2 test result (Appendix Table 3).  
22  
23

24  
25 We then quantified the performance of the CCIS in our external validation cohort. In this cohort,  
26  
27 the C-statistic for the points-based risk score was 0.792 (Figure 2). A score of zero or less ruled  
28  
29 out a positive SARS-CoV-2 test result in 1,863/5,925 patients (31.4%) with a sensitivity of  
30  
31 94.3% (95% CI 90.4–96.9). A score of four or more was observed in 174/5,925 patients (2.9%)  
32  
33 and had a specificity of 97.8 (95% CI 97.4–98.1) for predicting a positive SARS-CoV-2 test  
34  
35 result (Table 3).  
36  
37

38  
39 In a combined cohort of patients (derivation and validation combined), we compared the  
40  
41 discrimination and diagnostic performance of the CCIS to the CORC score. The CCIS had a C-  
42  
43 statistic of 0.837 compared to 0.750 for the CORC score (with race/ethnicity variables removed)  
44  
45 (Appendix Figure 1). A CCIS of zero or less ruled out SARS-CoV-2 infection in 28.4% of  
46  
47 patients with a sensitivity of 96.1% (Appendix Table 4) whereas a CORC score of negative one  
48  
49 or less ruled out SARS-CoV 2 infection in 9.9% of patients with 97.4% sensitivity (Appendix  
50  
51 Table 5). Compared to the CORC score (with race/ethnicity variables removed), the CCIS  
52  
53 showed substantial net reclassification improvement (NRI=0.310, Appendix Table 6).  
54  
55  
56  
57  
58  
59  
60



## Discussion

We have derived and validated a simple clinical risk score, the CCEDRRN COVID-19 Infection Score (CCIS), to predict an emergency department patient's probability of a positive SARS-CoV-2 NAAT. It utilizes only clinical variables available at the patient's bedside, along with a common publicly available measure of community COVID-19 incidence. In this study population, the score ruled out SARS-CoV-2 infection with 96.1% sensitivity in almost one-third of patients. It also identified patients at high risk of infection with over 95% specificity.

The CCIS has several important clinical applications. The ability to differentiate patients with high or low probability of COVID-19 disease could guide safe and effective patient isolation or cohorting from the time of hospital arrival, prior to the availability of SARS-CoV-2 test results. Identification of patients with extremely low risk of SARS-CoV-2 infection may even allow safe omission of testing, which will minimize testing resource utilization in settings with limited testing capacity. Identifying patients with a high probability of SARS-CoV-2 infection can help prioritize use of rapid antigen testing and initiation of effective empiric therapy in critically ill patients prior to availability of NAAT results. By presenting risk estimates and sensitivity for all risk score values, we allow end-users to choose cut-offs for ruling-in and ruling-out SARS-CoV-2 infection that make sense for their setting and application.

Several other risk prediction instruments have been developed to predict positive COVID-19 test results in undifferentiated patients. These tools were developed in studies with substantial methodological limitations and incorporate variables not immediately available at the time of a patient's hospital arrival, so are not useful to guide early isolation, testing and treatment decisions.<sup>2</sup> None of these risk prediction tools considered the prevalence of disease in the population. Prevalence can substantially change the approach to testing and cohorting, and this

1  
2  
3 will become increasingly important as prevalence rates drop and selective rather than liberal  
4 testing may be more appropriate.  
5  
6

7  
8 United States-based investigators recently reported the development<sup>3</sup> and validation<sup>25</sup> of the  
9  
10 CORC score using only clinical variables. The CORC score contains several similar variables to  
11  
12 the CCIS. However, the CORC score was derived in a non-consecutive sample of patients which  
13  
14 had a much higher incidence of disease than our study cohort and may be vulnerable to selection  
15  
16 bias. The CORC score also included race and ethnicity as predictor variables. This inclusion of  
17  
18 race and ethnicity variables limits the generalizability of the CORC score beyond the urban  
19  
20 American population in which it was developed, as it does not reflect the international diversity  
21  
22 of ethnic backgrounds. Moreover, it is unlikely race or ethnicity represents a biologic risk. The  
23  
24 association between race and ethnicity and SARS-CoV-2 infection in the CORC score likely  
25  
26 reflects other sociodemographic and geographic predictors of the risk of COVID-19 infection in  
27  
28 the American population.<sup>25</sup> The CCIS was derived in consecutive patients with a suspected  
29  
30 SARS-CoV-2 infection presenting to participating emergency departments, limiting potential for  
31  
32 selection bias, and uses the seven-day average local incidence as an estimate of population risk.  
33  
34 We believe this approach is more generalizable across populations and better reflects individual  
35  
36 patients' pre-test probability of SARS-CoV-2 infection.<sup>26</sup>  
37  
38  
39  
40  
41  
42

#### 43 *Strengths and Limitations*

44  
45

46 The cohorts used to derive and validate the rule included comprehensive data on consecutive  
47  
48 eligible patients from a large, geographically distributed network of Canadian urban, regional,  
49  
50 and rural emergency departments. Strict data quality protocols and data cleaning protocols  
51  
52 ensured the reliability of collected data.  
53  
54  
55  
56  
57  
58  
59  
60

1  
2  
3 In addition to clinical variables, we also included the average daily incidence of SARS-CoV-2  
4 infections in a patient's health region, which is an essential predictor of the probability of a  
5 patient's risk of COVID infection. This information is publicly reported in many health  
6 jurisdictions and particularly in high- and low-prevalence regions. This information remains  
7 constant over long periods of time so it can easily be integrated into risk prediction for an  
8 individual patient. In practical application of this risk score, patients in areas with high disease  
9 burden will automatically score two points, meaning that few patients in these settings will be  
10 classified as low risk. Therefore, symptomatic patients would all warrant testing. This  
11 underscores the need for liberal isolation and testing practices in settings with high rates of  
12 community SARS-CoV-2 transmission.  
13  
14

15  
16  
17 This study has some limitations. Some missing data required either multiple imputation or  
18 classification of missing categorical variables as being absent. The overall missingness of data in  
19 this registry is very low.<sup>15</sup> Although the data collection for the CCEDRRN registry relies on  
20 abstraction from health records, this approach has been shown to be reliable in our study sites  
21 when compared to prospective data collection.<sup>15</sup>  
22  
23

24  
25  
26 The clinical variables in the model are not likely to be sensitive to changes in geographical  
27 changes in SARS-CoV-2 epidemiology. The variable of travel from a country with high  
28 incidence may become less informative as the pandemic has spread globally and "hot spots"  
29 change. However, high-prevalence areas may change over time, meaning that the risk factor of  
30 travel from a region with a high prevalence is likely to still be informative.  
31  
32

33  
34  
35 This risk score was developed using data from patients enrolled in the first nine months of the  
36 pandemic when rates of influenza were low. As such, the score may need to be re-validated and  
37  
38  
39

1  
2  
3 refined in the future to reflect the influence of influenza, the emergence of variant strains of  
4 SARS-CoV-2, and widespread population immunization on patients' risk of infection.  
5  
6

7  
8 *Conclusion*  
9

10  
11 We derived and successfully validated the CCEDRRN COVID-19 Infection Score to accurately  
12 predict the probability of SARS-CoV-2 nucleic acid test results in emergency department  
13 patients. The CCIS uses clinical variables, accounts for the incidence of SARS-CoV-2 in the  
14 community and is ready for immediate clinical use. This score has potential utility to guide early  
15 decisions around SARS-CoV-2 test utilization, patient isolation, and empiric therapy for patients  
16 solely based on clinical assessment.  
17  
18  
19  
20  
21  
22  
23  
24  
25  
26  
27  
28  
29  
30  
31  
32  
33  
34  
35  
36  
37  
38  
39  
40  
41  
42  
43  
44  
45  
46  
47  
48  
49  
50  
51  
52  
53  
54  
55  
56  
57  
58  
59  
60

### *Contributors*

CMH, ADM, LJM, RJR, and JJP conceived the study, with input on the design and selection of variables from the other contributors. CMH, LJM, PA, SCB, PD obtained funding on behalf of the CCEDRRN investigators. CMH, ADM, PA, SCB, IC, PD, JH, BHR, RO, MW, and KY facilitated data collection along with other members of the CCEDRRN and can verify the underlying data. RJR and JJP developed the analytic plan. SV performed the analysis, with assistance from GG and RJR, including accessing and verification of underlying data. All contributors provided input on interpretation of findings. ADM, CMH, and RJR drafted the manuscript with additional input from all contributors.

### *Acknowledgment*

We gratefully acknowledge the assistance of Ms. Amber Cragg in the preparation of this manuscript. We thank the UBC clinical coordinating centre staff, the UBC legal, ethics, privacy and contract staff and the research staff at each of the participating institutions in the network outlined in the attached Supplement. The network would not exist today without the dedication of these professionals.

Thank you to all our patient partners who shared their lived experiences and perspectives to ensure that the knowledge we co-create addresses the concerns of patients and the public. Creating the largest network of collaboration across Canadian Emergency Departments would not have been feasible without the tireless efforts of Emergency Department Chiefs, and research coordinators and research assistants at participating sites. Finally, our most humble and sincere gratitude to all our colleagues in medicine, nursing, and the allied health professions who have been on the front lines of this pandemic from day one staffing our ambulances, Emergency

1  
2  
3 Departments, ICUs, and hospitals bravely facing the risks of COVID-19 to look after our fellow  
4 citizens and after one another. We dedicate this network to you. (Supplementary Table)  
5  
6

### 7 8 *Data Sharing* 9

10  
11 For investigators who wish to access Canadian COVID-19 Emergency Rapid Response Network  
12 data, proposals may be submitted to the network for review and approval by the network's peer-  
13 review publication committee, the data access and management committee and the executive  
14 committee, as per the network's governance. Information regarding submitting proposals and  
15 accessing data may be found at <https://canadiancovid19ednetwork.org/>.  
16  
17  
18  
19  
20  
21  
22

### 23 *Funding Acknowledgement* 24

25  
26 The network is funded by the Canadian Institutes of Health Research (447679), BC Academic  
27 Health Science Network Society, BioTalent Canada, Genome BC (COV024; VAC007), Ontario  
28 Ministry of Colleges and Universities (C-655-2129), the Saskatchewan Health Research  
29 Foundation (5357) and the Fondation CHU de Québec (Octroi #4007).  
30  
31  
32  
33  
34  
35  
36  
37  
38  
39  
40  
41  
42  
43  
44  
45  
46  
47  
48  
49  
50  
51  
52  
53  
54  
55  
56  
57  
58  
59  
60

## References

- 1 Weekly epidemiological update on COVID-19 - 25 May 2021. <https://www.who.int/publications/m/item/weekly-epidemiological-update-on-covid-19---25-may-2021> (accessed June 4, 2021).
- 2 Wynants L, Van Calster B, Collins GS, *et al.* Prediction models for diagnosis and prognosis of covid-19 infection: systematic review and critical appraisal. *BMJ* 2020; **369**: m1328.
- 3 Kline JA, Camargo CA, Courtney DM, *et al.* Clinical prediction rule for SARS-CoV-2 infection from 116 U.S. emergency departments 2-22-2021. *PloS One* 2021; **16**: e0248438.
- 4 McDonald SA, Medford RJ, Basit MA, Diercks DB, Courtney DM. Derivation With Internal Validation of a Multivariable Predictive Model to Predict COVID-19 Test Results in Emergency Department Patients. *Acad Emerg Med Off J Soc Acad Emerg Med* 2021; **28**: 206–14.
- 5 Kurstjens S, van der Horst A, Herpers R, *et al.* Rapid identification of SARS-CoV-2-infected patients at the emergency department using routine testing. *Clin Chem Lab Med* 2020; **58**: 1587–93.
- 6 Lippi G, Henry BM, Hoehn J, Benoit S, Benoit J. Validation of the Corona-Score for rapid identification of SARS-CoV-2 infections in patients seeking emergency department care in the United States. *Clin Chem Lab Med* 2020; **58**: e311–3.
- 7 Sung J, Choudry N, Bachour R. Development and validation of a simple risk score for diagnosing COVID-19 in the emergency room. *Epidemiol Infect* 2020; **148**: e273.
- 8 Schwab P, Schütte AD, Dietz B, Bauer S. Clinical Predictive Models for COVID-19: Systematic Study. *J Med Internet Res* 2020; **22**: e21439.
- 9 Plante TB, Blau AM, Berg AN, *et al.* Development and External Validation of a Machine Learning Tool to Rule Out COVID-19 Among Adults in the Emergency Department Using Routine Blood Tests: A Large, Multicenter, Real-World Study. *J Med Internet Res* 2020; **22**: e24048.
- 10 Soltan AAS, Kouchaki S, Zhu T, *et al.* Rapid triage for COVID-19 using routine clinical data for patients attending hospital: development and prospective validation of an artificial intelligence screening test. *Lancet Digit Health* 2021; **3**: e78–87.
- 11 Cabitza F, Campagner A, Ferrari D, *et al.* Development, evaluation, and validation of machine learning models for COVID-19 detection based on routine blood tests. *Clin Chem Lab Med* 2020; **59**: 421–31.
- 12 Jehi L, Ji X, Milinovich A, *et al.* Individualizing Risk Prediction for Positive Coronavirus Disease 2019 Testing: Results From 11,672 Patients. *Chest* 2020; **158**: 1364–75.

- 1  
2  
3 13 Joshi RP, Pejaver V, Hammarlund NE, *et al.* A predictive tool for identification of SARS-  
4 CoV-2 PCR-negative emergency department patients using routine test results. *J Clin Virol*  
5 2020; **129**: 104502.  
6  
7  
8 14 Formica V, Minieri M, Bernardini S, *et al.* Complete blood count might help to identify  
9 subjects with high probability of testing positive to SARS-CoV-2. *Clin Med Lond Engl* 2020;  
10 **20**: e114–9.  
11  
12 15 Hohl CM, Rosychuk RJ, McRae AD, *et al.* Development of the Canadian COVID-19  
13 Emergency Department Rapid Response Network population-based registry: a methodology  
14 study. *CMAJ Open* 2021; **9**: E261–70.  
15  
16 16 Moons KGM, Altman DG, Reitsma JB, *et al.* Transparent Reporting of a multivariable  
17 prediction model for Individual Prognosis or Diagnosis (TRIPOD): explanation and  
18 elaboration. *Ann Intern Med* 2015; **162**: W1-73.  
19  
20  
21 17 W.H. Organization. Clinical Characterisation Protocol (CCP), Version 3.1/3.2. Oxford  
22 University.  
23  
24 18 ISARIC/WHO Clinical Characterisation Protocol for Severe Emerging Infections [COVID-  
25 19] [UPH]. Health Res. Auth. /planning-and-improving-research/application-  
26 summaries/research-summaries/isaricwho-clinical-characterisation-protocol-for-severe-  
27 emerging-infections/ (accessed June 4, 2021).  
28  
29  
30 19 Health Regional Archive (Public View). [https://resources-](https://resources-covid19canada.hub.arcgis.com/datasets/3aa9f7b1428642998fa399c57dad8045/data?layer=1)  
31 [covid19canada.hub.arcgis.com/datasets/3aa9f7b1428642998fa399c57dad8045/data?layer=1](https://resources-covid19canada.hub.arcgis.com/datasets/3aa9f7b1428642998fa399c57dad8045/data?layer=1)  
32 (accessed June 4, 2021).  
33  
34  
35 20 Steyerberg EW. Clinical Prediction Rules. 2019: 55.  
36  
37 21 Leening MJG, Vedder MM, Witteman JCM, Pencina MJ, Steyerberg EW. Net reclassification  
38 improvement: computation, interpretation, and controversies: a literature review and  
39 clinician's guide. *Ann Intern Med* 2014; **160**: 122–31.  
40  
41 22 Kerr KF, Wang Z, Janes H, McClelland RL, Psaty BM, Pepe MS. Net reclassification indices  
42 for evaluating risk prediction instruments: a critical review. *Epidemiol Camb Mass* 2014; **25**:  
43 114–21.  
44  
45 23 R Core Team. R: A language and environment for statistical computing. Vienna, Austria: R  
46 Foundation for Statistical Computing, 2020 <https://www.R-project.org/>.  
47  
48 24 Harrell, FE Jr. rms: Regression Modeling Strategies., Version 6.2-0. 2021 [https://cran.r-](https://cran.r-project.org/web/packages/rms/index.html)  
49 [project.org/web/packages/rms/index.html](https://cran.r-project.org/web/packages/rms/index.html).  
50  
51  
52 25 Nevel AE, Kline JA. Inter-rater reliability and prospective validation of a clinical prediction  
53 rule for SARS-CoV-2 infection. *Acad Emerg Med*. 2021 Jun 16. doi: 10.1111/acem.14309.  
54 Epub ahead of print. PMID: 34133794.  
55  
56  
57  
58  
59  
60



1  
2  
3  
4  
5  
6  
7  
8  
9  
10  
11  
12  
13  
14  
15  
16  
17  
18  
19  
20  
21  
22  
23  
24  
25  
26  
27  
28  
29  
30  
31  
32  
33  
34  
35  
36  
37  
38  
39  
40  
41  
42  
43  
44  
45  
46  
47  
48  
49  
50  
51  
52  
53  
54  
55  
56  
57  
58  
59  
60

26 Vyas DA, Eisenstein LG, Jones DS. Hidden in Plain Sight — Reconsidering the Use of Race Correction in Clinical Algorithms. *N Engl J Med* 2020; **383**: 874–82

For peer review only

## Tables & Figures

**Figure 1.** Flow Diagram of Patients through the study. ED=emergency department; COVID=coronavirus disease

For peer review only

**Figure 2.** Distribution and performance of the CCEDRRN COVID Infection Score in the derivation cohort (left panel) and validation cohorts (right panel): A) distribution of the score, B) observed infection risk across the range of the score, C) predicted versus observed probability of infection risk, and D) receiver operating characteristic curve with area under the curve (AUC) and associated 95% confidence interval.

A)

B)

C)

D)

For peer review only

AUC 0.84 (0.82-0.85)

AUC 0.79 (0.76-0.82)

**Table 1.** Characteristics and selected outcomes of enrolled patients

|                                                                                  | <b>Derivation<br/>(n=21743)</b> | <b>Validation<br/>(n=5922)</b> |
|----------------------------------------------------------------------------------|---------------------------------|--------------------------------|
| <b>Age in years, median (IQR)</b>                                                | 57 (38, 73)                     | 56 (37, 73)                    |
| <b>Female (%)</b>                                                                | 10992 (50.5)                    | 3085 (52.1)                    |
| <b>Arrival From, n (%)</b>                                                       |                                 |                                |
| Home                                                                             | 19879 (91.4)                    | 5429 (91.7)                    |
| Long-term care/Rehabilitation facility/Corrections facility                      | 1000 (4.6)                      | 262 (4.4)                      |
| No fixed address/ Shelter/ Single room occupancy                                 | 574 (2.6)                       | 201 (3.4)                      |
| Inter-hospital transfer                                                          | 290 (1.3)                       | 30 (0.5)                       |
| <b>Risk for Infection, n (%)</b>                                                 |                                 |                                |
| Healthcare worker                                                                | 505 (2.3)                       | 567 (9.6)                      |
| Household/caregiver contact                                                      | 566 (2.6)                       | 161 (2.7)                      |
| Institutional exposure (e.g., LTC, prison)                                       | 1354 (6.2)                      | 213 (3.6)                      |
| Microbiology lab                                                                 | 4 (0.0)                         | 8 (0.1)                        |
| Travel                                                                           | 924 (4.2)                       | 344 (5.8)                      |
| Other                                                                            | 1320 (6.1)                      | 449 (7.6)                      |
| Unknown                                                                          | 5415 (24.9)                     | 1856 (31.3)                    |
| No documented risk for infection                                                 | 10028 (46.1)                    | 1075 (18.1)                    |
| <b>Arrival Vital Signs, median (IQR)</b>                                         |                                 |                                |
| Body temperature                                                                 | 36.7 (36.3, 37.1)               | 36.8 (36.5, 37.1)              |
| Heart rate                                                                       | 91 (79, 107)                    | 90 (78, 105)                   |
| Oxygen saturation                                                                | 97 (95, 98)                     | 97 (95, 99)                    |
| Respiratory rate                                                                 | 18 (18, 20)                     | 18 (16, 20)                    |
| Systolic blood pressure                                                          | 133 (118, 150)                  | 136 (120, 149)                 |
| <b>Common Comorbid Conditions, n (%)</b>                                         |                                 |                                |
| Active malignant neoplasm (cancer)                                               | 1678 (7.7)                      | 333 (5.6)                      |
| Asthma                                                                           | 1699 (7.8)                      | 468 (7.9)                      |
| Atrial fibrillation                                                              | 1598 (7.3)                      | 402 (6.8)                      |
| Chronic kidney disease                                                           | 1214 (5.6)                      | 321 (5.4)                      |
| Chronic lung disease (not asthma/pulmonary fibrosis)                             | 1729 (8)                        | 583 (9.8)                      |
| Chronic neurological disorder (not dementia; e.g., stroke/TIA, seizure disorder) | 1310 (6)                        | 400 (6.8)                      |
| Congestive heart failure                                                         | 1450 (6.7)                      | 368 (6.2)                      |
| Coronary artery disease                                                          | 1591 (7.3)                      | 449 (7.6)                      |
| Dementia                                                                         | 734 (3.4)                       | 188 (3.2)                      |
| Diabetes                                                                         | 2583 (11.9)                     | 916 (15.5)                     |
| Dialysis                                                                         | 198 (0.9)                       | 28 (0.5)                       |
| Dyslipidemia                                                                     | 2375 (10.9)                     | 543 (9.2)                      |
| Hypertension                                                                     | 6320 (29.1)                     | 1697 (28.6)                    |
| Hypothyroidism                                                                   | 1344 (6.2)                      | 397 (6.7)                      |

|                                               |              |             |
|-----------------------------------------------|--------------|-------------|
| Mild liver disease                            | 280 (1·3)    | 90 (1·5)    |
| Moderate/severe liver disease                 | 245 (1·1)    | 88 (1·5)    |
| Obesity (clinical impression)                 | 284 (1·3)    | 108 (1·8)   |
| Organ transplant                              | 128 (0·6)    | 19 (0·3)    |
| Rheumatologic disorder                        | 1122 (5·2)   | 258 (4·4)   |
| Other                                         | 10075 (46·3) | 2174 (36·7) |
| Past malignant neoplasm (cancer)              | 936 (4·3)    | 256 (4·3)   |
| Psychiatric condition/Mental health diagnosis | 2967 (13·6)  | 831 (14)    |
| Pulmonary fibrosis                            | 80 (0·4)     | 26 (0·4)    |
| <b>Symptoms Reported, n(%)</b>                |              |             |
| Abdominal pain                                | 2725 (12·5)  | 540 (9·1)   |
| Altered consciousness/confusion               | 1456 (6·7)   | 322 (5·4)   |
| Bleeding (hemorrhage)                         | 330 (1·5)    | 22 (0·4)    |
| Chest pain (includes discomfort or tightness) | 4242 (19·5)  | 974 (16·4)  |
| Chills                                        | 2045 (9·4)   | 594 (10)    |
| Conjunctivitis                                | 49 (0·2)     | 26 (0·4)    |
| Cough                                         | 7724 (35·5)  | 2663 (44·9) |
| Diarrhea                                      | 2140 (9·8)   | 526 (8·9)   |
| Dizziness/Vertigo                             | 1521 (7)     | 300 (5·1)   |
| Dysgeusia/anosmia                             | 140 (0·6)    | 33 (0·6)    |
| Ear pain                                      | 144 (0·7)    | 30 (0·5)    |
| Fatigue/malaise                               | 3361 (15·5)  | 924 (15·6)  |
| Fever                                         | 5055 (23·2)  | 1580 (26·7) |
| Headache                                      | 2144 (9·9)   | 624 (10·5)  |
| Hemoptysis (bloody sputum)                    | 298 (1·4)    | 66 (1·1)    |
| Joint pain (arthralgia)                       | 296 (1·4)    | 82 (1·4)    |
| Lower chest wall indrawing                    | 10 (0)       | 7 (0·1)     |
| Lymphadenopathy                               | 67 (0·3)     | 21 (0·4)    |
| Muscle aches (myalgia)                        | 1575 (7·2)   | 517 (8·7)   |
| Nausea/vomiting                               | 4219 (19·4)  | 935 (15·8)  |
| No recorded symptoms                          | 2113 (9·7)   | 431 (7·3)   |
| Runny nose (rhinorrhea)                       | 1061 (4·9)   | 501 (8·5)   |
| Seizures                                      | 205 (0·9)    | 42 (0·7)    |
| Shortness of breath (dyspnea)                 | 8537 (39·3)  | 2383 (40·2) |
| Skin rash                                     | 241 (1·1)    | 38 (0·6)    |
| Skin ulcers                                   | 27 (0·1)     | <5          |
| Sore throat                                   | 3024 (13·9)  | 985 (16·6)  |
| Sputum production                             | 1507 (6·9)   | 401 (6·8)   |
| Wheezing                                      | 582 (2·7)    | 130 (2·2)   |
| <b>Tobacco Use, n (%)</b>                     | 1852 (8·5)   | 616 (10·4)  |
| <b>Illicit Substance Use, n (%)</b>           | 1219 (5·6)   | 353 (6·0)   |

|                                                            |                |                 |
|------------------------------------------------------------|----------------|-----------------|
| <b>Oxygen Required in ED, n (%)</b>                        | 1919 (8·8)     | 627 (10·6)      |
| <b>Hospital Admission, n (%)</b>                           | 9913 (45·6)    | 2446 (41·3)     |
| <b>In-hospital Death, n (%)</b>                            | 753 (3·5)      | 213 (3·6)       |
| <b>7-day average incident COVID-19 cases, median (IQR)</b> | 1·3 (0·7, 3·2) | 0·96 (0·5, 1·3) |
| <b>SARS-CoV-2 Positive, n (%)</b>                          | 940 (4·3)      | 227 (3·8)       |

IQR=interquartile range; LTC=long-term care; TIA= transient ischemic attack; ED=emergency department

For peer review only

**Table 2.** Adjusted associations between model predictor variables and SARS-CoV-2 nucleic acid test results

| Variable/Score Component                                                                                | Regression Coefficient (SE) | Adjusted Odds Ratio (95% CI) | Score Value |
|---------------------------------------------------------------------------------------------------------|-----------------------------|------------------------------|-------------|
| <b>7-day average incident COVID-19 cases</b>                                                            |                             |                              |             |
| 0 – 2 daily cases per 100,000 population                                                                | -                           | -                            | 0           |
| 2 to 7.99 daily cases per 100,000 population                                                            | 1.22 (0.09)                 | 3.38 (2.85–4.00)             | 1           |
| ≥8 daily cases per 100,000 population                                                                   | 2.21 (0.10)                 | 9.09 (7.53–10.97)            | 2           |
| <b>Institutional exposure (e.g. LTC, prison) or Travel from country with known cases within 14 days</b> | 0.88 (0.09)                 | 2.40 (2.01–2.87)             | 1           |
| <b>Healthcare worker/Microbiology lab</b>                                                               | 1.10 (0.16)                 | 3.02 (2.22–4.10)             | 1           |
| <b>Household/caregiver contact</b>                                                                      | 1.83 (0.12)                 | 6.25 (4.92–7.93)             | 2           |
| <b>Temperature</b>                                                                                      |                             |                              |             |
| <36 and no self-reported fever                                                                          | -0.75 (0.3)                 | 0.47 (0.28–0.80)             | -1          |
| 36 – 37.4 and no self-reported fever                                                                    | -                           | -                            | 0           |
| ≥37.5 or self-reported fever                                                                            | 1.21 (0.08)                 | 3.36 (2.88–3.91)             | 1           |
| <b>Supplemental oxygen delivered in the ED</b>                                                          | 0.98 (0.1)                  | 2.66 (2.18–3.24)             | 1           |
| <b>Cough</b>                                                                                            | 0.85 (0.08)                 | 2.33 (2.01–2.71)             | 1           |
| <b>Dysgeusia/Anosmia</b>                                                                                | 2.03 (0.24)                 | 7.60 (4.76–12.15)            | 2           |
| <b>Muscle aches (Myalgia)</b>                                                                           | 0.7 (0.11)                  | 2.02 (1.64–2.48)             | 1           |
| <b>Current tobacco user</b>                                                                             | -1.13 (0.21)                | 0.32 (0.21–0.49)             | -1          |

LTC: Long-term care; ED: Emergency Department

**Table 3.** Performance metrics for the CCEDRRN COVID-19 Infection Score for ruling in or ruling out SARS-CoV-2 infection at different score cut-off values in the validation cohort

| Score cutoff     | n (%)       | Sensitivity (%; 95% CI) | Specificity (%; 95% CI) | LR+  | LR- | PPV  | NPV  | COVID+ n (%) |
|------------------|-------------|-------------------------|-------------------------|------|-----|------|------|--------------|
| <b>Rule out:</b> |             |                         |                         |      |     |      |      |              |
| ≤-2              | 17 (0.3)    | 100 (98.4–100)          | 0.3 (0.2–0.5)           | 1    | NA  | 3.8  | 100  | 0 (0)        |
| ≤-1              | 310 (5.2)   | 99.6 (97.6–100)         | 5.4 (4.9–6.1)           | 1.1  | 0.1 | 4.0  | 99.7 | 1 (0.3)      |
| ≤0               | 1863 (31.5) | 94.3 (90.4–96.9)        | 32.5 (31.3–33.7)        | 1.4  | 0.2 | 5.3  | 99.3 | 13 (0.7)     |
| ≤1               | 3806 (64.3) | 78.9 (73.0–84.0)        | 66.0 (64.7–67.2)        | 2.3  | 0.3 | 8.5  | 98.7 | 48 (1.3)     |
| ≤2               | 5152 (87.0) | 52.9 (46.2–60.0)        | 88.6 (87.7–89.4)        | 4.6  | 0.5 | 15.6 | 97.9 | 107 (2.1)    |
| ≤3               | 5748 (97.1) | 20.7 (15.6–26.6)        | 97.8 (97.4–98.1)        | 9.3  | 0.8 | 27.0 | 96.9 | 180 (3.1)    |
| <b>Rule in:</b>  |             |                         |                         |      |     |      |      |              |
| ≥3               | 770 (13.0)  | 52.9 (46.2–59.5)        | 88.6 (87.7–89.4)        | 4.6  | 0.5 | 15.6 | 97.9 | 120 (15.6)   |
| ≥4               | 174 (2.9)   | 20.7 (15.6–26.6)        | 97.8 (97.4–98.1)        | 9.3  | 0.8 | 27.0 | 96.9 | 47 (27.0)    |
| ≥5               | 44 (0.7)    | 7.9 (4.8–12.2)          | 99.5 (99.3–99.7)        | 17.4 | 0.9 | 40.9 | 96.4 | 18 (40.9)    |
| ≥6               | 6 (0.1)     | 0.9 (0.1–3.2)           | 99.9 (99.8–100)         | 12.5 | 1   | 33.3 | 96.2 | 2 (33.3)     |
| ≥7               | 1 (<0.1)    | 0 (0–1.6)               | 100.0 (99.9–100)        | NA   | 1   | 0    | 96.2 | 0 (0)        |

PPV: Positive Predictive Value; NPV: Negative Predictive Value; LR+: Positive Likelihood Ratio; LR-: Negative Likelihood Ratio



1  
2  
3  
4  
5  
6  
7  
8  
9  
10  
11  
12  
13  
14  
15  
16  
17  
18  
19  
20  
21  
22  
23  
24  
25  
26  
27  
28  
29  
30  
31  
32  
33  
34  
35  
36  
37  
38  
39  
40  
41  
42  
43  
44  
45  
46  
47  
48  
49  
50  
51  
52  
53  
54  
55  
56  
57  
58  
59  
60

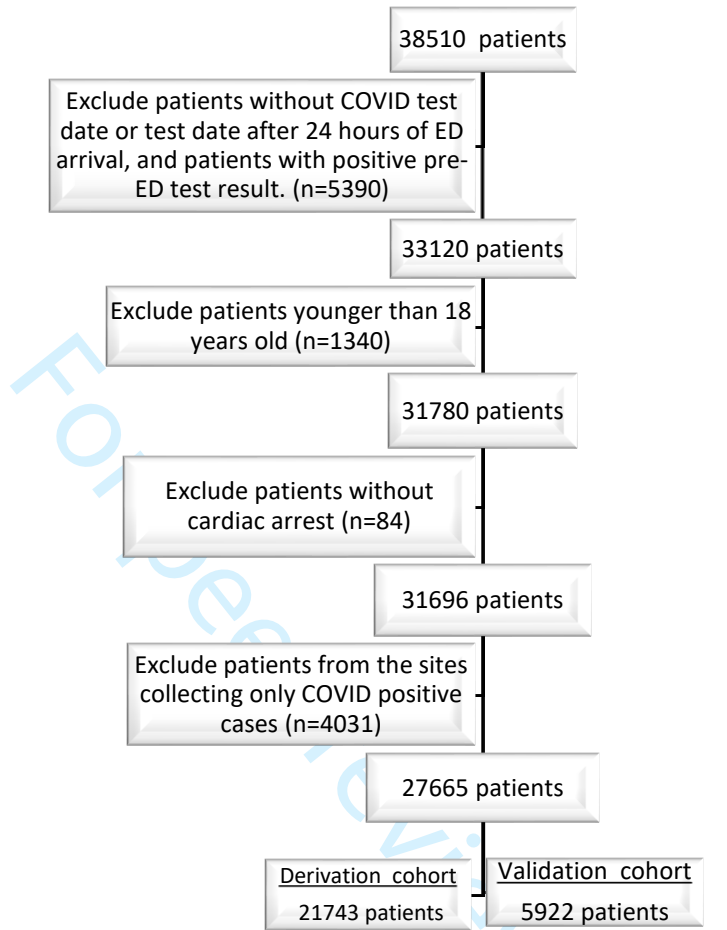

**Figure 2. Distribution and performance of the CCEDRRN COVID Infection Score in the derivation cohort (left panel) and validation cohorts (right panel): A) distribution of the score, B) observed in-hospital mortality across the range of the score, C) predicted versus observed probability of in-hospital mortality, and D) receiver operating characteristic curve with area under the curve (AUC) and associated 95% confidence interval.**

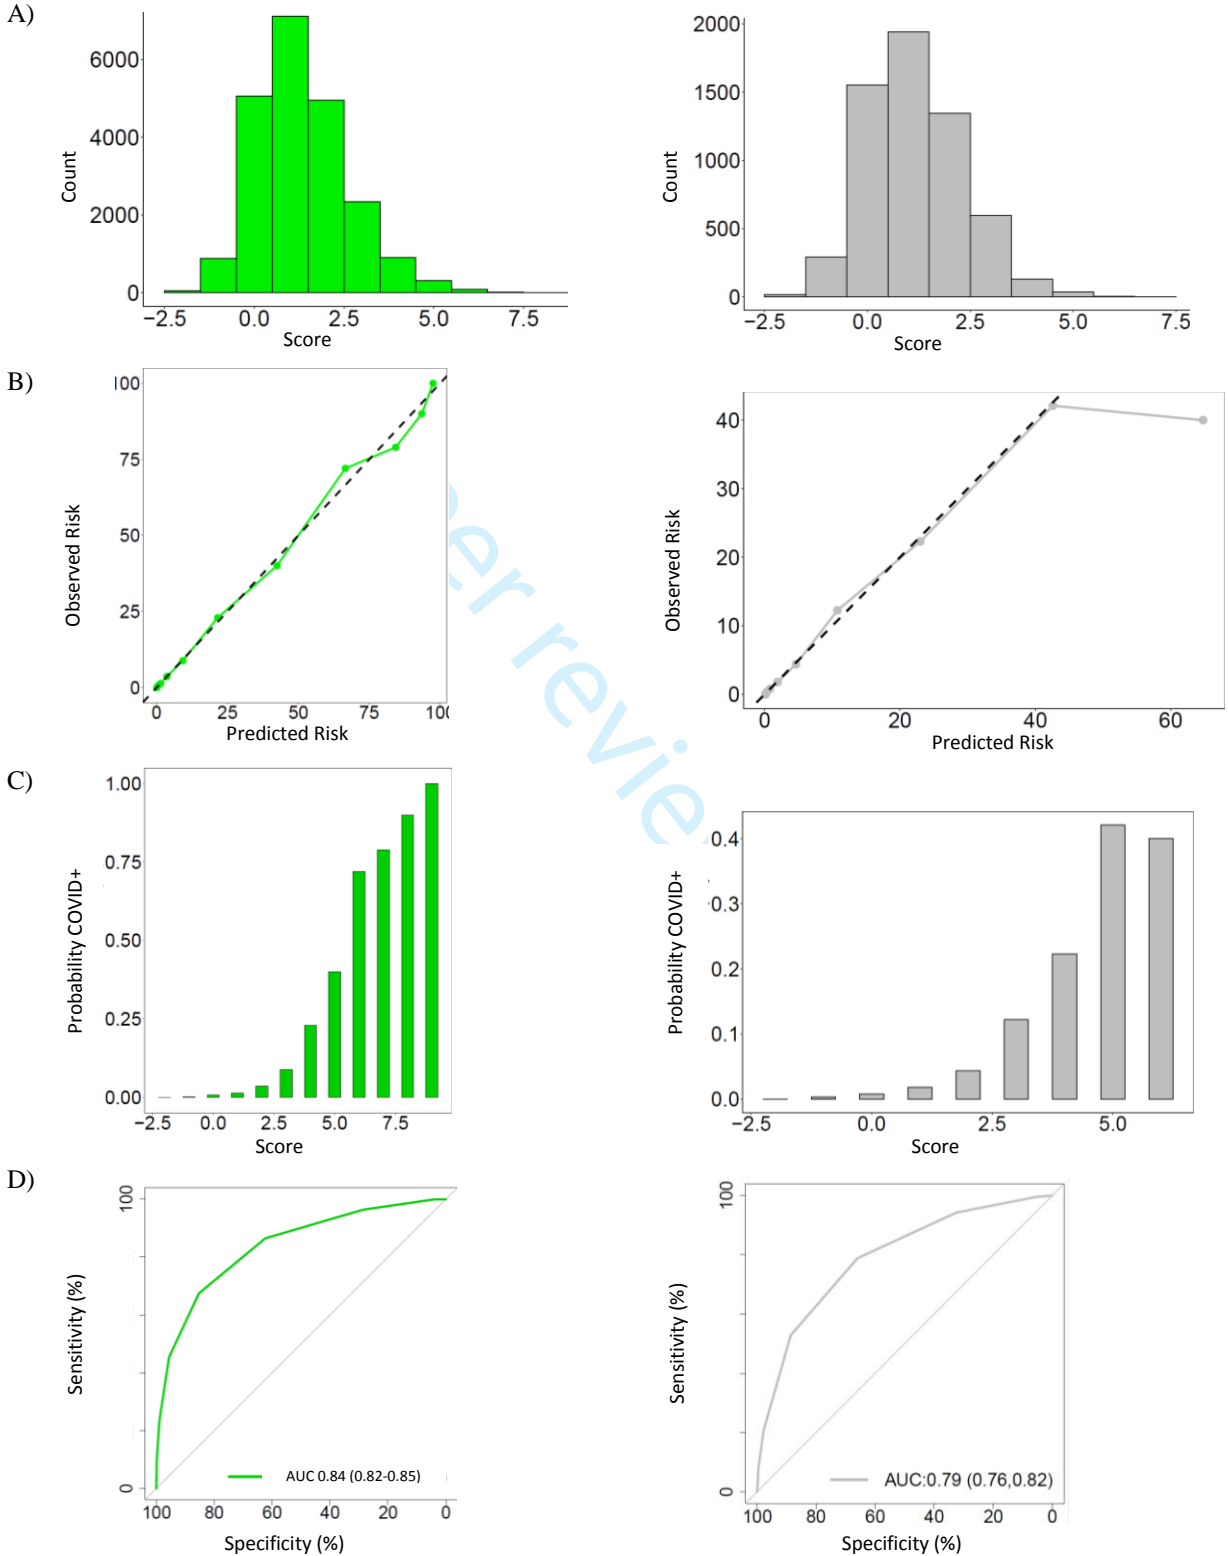

## Appendices

**Appendix Table 1.** Patients enrolled by CCEDRRN site and time periods for data collection

| Site (N patients contributed)                    | Mar 2020    | Apr 2020    | May 2020    | Jun 2020    | Jul 2020    | Aug 2020    | Sept 2020   | Oct 2020   | Total        |
|--------------------------------------------------|-------------|-------------|-------------|-------------|-------------|-------------|-------------|------------|--------------|
| <b>Derivation Cohort</b>                         | <b>3217</b> | <b>4797</b> | <b>5493</b> | <b>3096</b> | <b>2232</b> | <b>1276</b> | <b>1266</b> | <b>366</b> | <b>21743</b> |
| Abbotsford Regional Hospital                     |             | 228         | 474         | 385         | 198         |             |             |            | 1285         |
| Eagle Ridge Hospital                             | 196         | 163         |             |             |             |             |             |            | 359          |
| Foothills, Calgary                               | 437         | 131         |             |             |             |             |             |            | 568          |
| Halifax Infirmiry/Dalhousie, Nova Scotia         | 17          |             |             |             |             |             |             |            | 17           |
| Hants Community Hospital, Nova Scotia            | 1           |             |             |             |             |             |             |            | 1            |
| Hôpital du Sacré-Coeur de Montreal               | 27          | 96          | 401         |             |             |             |             |            | 524          |
| Hôtel-Dieu de Lévis                              | 1           | 19          | 246         |             |             |             |             |            | 266          |
| Jewish General Hospital                          | 754         | 959         | 93          |             |             |             |             |            | 1806         |
| Peter Lougheed Centre                            | 321         | 1119        | 1169        | 605         | 638         | 552         | 616         | 215        | 5235         |
| Royal Columbian Hospital                         | 236         | 408         | 366         |             |             |             |             |            | 1010         |
| Royal University, Saskatoon                      | 132         | 275         | 357         | 296         | 340         | 265         | 193         |            | 1858         |
| Saint John Regional Hospital, New Brunswick      | 98          | 102         |             |             |             |             |             |            | 200          |
| South Campus, Calgary                            | 367         | 598         | 612         | 526         | 586         | 459         | 457         | 151        | 3756         |
| Sunnybrook Health Sciences Centre                |             |             | 473         | 593         | 470         |             |             |            | 1536         |
| The Ottawa Hospital - Civic Campus               | 58          | 24          | 537         |             |             |             |             |            | 619          |
| Vancouver General Hospital                       | 572         | 675         | 765         | 691         |             |             |             |            | 2703         |
| <b>Validation Cohort</b>                         | <b>2082</b> | <b>2012</b> | <b>695</b>  | <b>381</b>  | <b>330</b>  |             | <b>422</b>  |            | <b>5922</b>  |
| Cobequid Community Health Centre                 | 6           |             |             |             |             |             |             |            | 6            |
| Dartmouth General College, Dartmouth Nova Scotia | 7           |             |             |             |             |             |             |            | 7            |
| Health Science North, Sudbury Ontario            |             |             | 295         | 381         | 330         |             |             |            | 1006         |

|                                                                          |     |     |     |  |  |  |     |  |      |
|--------------------------------------------------------------------------|-----|-----|-----|--|--|--|-----|--|------|
| Hôpital de l'Enfant-Jésus, CHU de Québec-Université Laval                | 40  | 99  | 26  |  |  |  |     |  | 165  |
| IUCPQ: Institut universitaire de cardiologie et de pneumologie de Québec | 4   | 5   | 95  |  |  |  |     |  | 104  |
| Lions Gate Hospital                                                      | 294 | 220 |     |  |  |  |     |  | 514  |
| Mount St Joseph's                                                        | 236 |     |     |  |  |  |     |  | 236  |
| Rockyview, Calgary                                                       | 368 | 104 |     |  |  |  |     |  | 472  |
| Saint Paul's Hospital                                                    | 541 |     |     |  |  |  |     |  | 541  |
| Saskatoon City Hospital, Saskatoon                                       | 33  | 53  |     |  |  |  |     |  | 86   |
| Secondary Assessment Centers of Dartmouth General and Halifax Infirmary  | 3   | 70  | 66  |  |  |  |     |  | 139  |
| St Paul's Hospital, Saskatoon                                            | 84  | 198 |     |  |  |  |     |  | 282  |
| Surrey Memorial Hospital                                                 | 404 | 927 |     |  |  |  |     |  | 1331 |
| The Ottawa Hospital - General Campus                                     | 62  | 33  | 135 |  |  |  |     |  | 230  |
| Toronto Western Hospital                                                 |     |     |     |  |  |  | 422 |  | 422  |
| University of Alberta Hospital                                           |     | 303 | 78  |  |  |  |     |  | 381  |

**Appendix Table 2.** Candidate variables for entry into regression model

| Variable                                      | Definition                                                                 | N (%)<br>Missing |
|-----------------------------------------------|----------------------------------------------------------------------------|------------------|
| <b>Demographics</b>                           |                                                                            |                  |
| Age                                           | Age in years                                                               | 0 (0)            |
| Sex                                           | Male, Female, Other                                                        | 0 (0)            |
| Arrival from                                  | Home + other (not clearly documented)                                      | 0 (0)            |
|                                               | Single room + no fixed address + shelter                                   | 0 (0)            |
|                                               | Institutional living: long-term care/rehab + correctional                  | 0 (0)            |
|                                               | Inter-hospital transfer                                                    | 0 (0)            |
| <b>Infection risk</b>                         |                                                                            |                  |
| Travel risk                                   | Travel from country with known cases within 14 days                        | 0 (0)            |
| Institutional exposure                        | Possible exposure in institutional setting (e. g., Long-term care, prison) | 0 (0)            |
| Healthcare worker                             | Healthcare worker/Microbiology lab employee                                | 0 (0)            |
| Household/caregiver contact                   | Household contact /caregiver of known positive case                        | 0 (0)            |
| No documented risk                            | Documented absence of risk factors                                         | 0 (0)            |
| <b>Emergency department variables</b>         |                                                                            |                  |
| ED arrival mode                               |                                                                            | 2 (0)            |
| Ambulance:                                    | arrived by ambulance                                                       |                  |
| Self/police                                   | self-transported or transported to ED by police                            |                  |
| Arrival heart rate                            | beats/minute                                                               | 452 (2.1)        |
| Arrival respiratory rate                      | breaths/minute                                                             | 732 (3.4)        |
| Arrival oxygen saturation                     | %                                                                          | 517 (2.4)        |
| Lowest recorded oxygen saturation in ED       | %                                                                          | 445 (2.0)        |
| Fever                                         |                                                                            | 847 (3.9)        |
| Temperature <36.0                             | Temperature <36.0C AND no self-reported fever                              |                  |
| Temperature 36.0-37.4                         | Temperature 36.0-37.4C AND no self-reported fever                          |                  |
| Temperature ≥37.5 or fever                    | Temperature ≥37.5 OR self-reported fever                                   |                  |
| Respiratory distress                          | Increased work of breathing documented by treating clinician               | 1(0)             |
| Supplemental oxygen delivered in the ED       | Yes/No                                                                     | 0 (0)            |
| <b>COVID symptoms</b>                         |                                                                            |                  |
| Abdominal pain                                | Patient-reported symptom as documented by treating clinician               | 0 (0)            |
| Altered consciousness/confusion               | Patient-reported symptom as documented by treating clinician               | 0 (0)            |
| Bleeding (hemorrhage)                         | Patient-reported symptom as documented by treating clinician               | 0 (0)            |
| Chest pain (includes discomfort or tightness) | Patient-reported symptom as documented by treating clinician               | 0 (0)            |
| Chills                                        | Patient-reported symptom as documented by treating clinician               | 0 (0)            |
| Conjunctivitis                                | Patient-reported symptom as documented by treating clinician               | 0 (0)            |
| Cough                                         | Patient-reported symptom as documented by treating clinician               | 0 (0)            |

|                                              |                                                                                                                                                                    |          |
|----------------------------------------------|--------------------------------------------------------------------------------------------------------------------------------------------------------------------|----------|
| Diarrhea                                     | Patient-reported symptom as documented by treating clinician                                                                                                       | 0 (0)    |
| Dizziness/Vertigo                            | Patient-reported symptom as documented by treating clinician                                                                                                       | 0 (0)    |
| Dysgeusia/anosmia                            | Patient-reported symptom as documented by treating clinician                                                                                                       | 0 (0)    |
| Ear pain                                     | Patient-reported symptom as documented by treating clinician                                                                                                       | 0 (0)    |
| Fatigue/malaise                              | Patient-reported symptom as documented by treating clinician                                                                                                       | 0 (0)    |
| Headache                                     | Patient-reported symptom as documented by treating clinician                                                                                                       | 0 (0)    |
| Hemoptysis (bloody sputum)                   | Patient-reported symptom as documented by treating clinician                                                                                                       | 0 (0)    |
| Joint pain (arthralgia)                      | Patient-reported symptom as documented by treating clinician                                                                                                       | 0 (0)    |
| Lymphadenopathy                              | Patient-reported symptom as documented by treating clinician                                                                                                       | 0 (0)    |
| Muscle aches (myalgia)                       | Patient-reported symptom as documented by treating clinician                                                                                                       | 0 (0)    |
| Nausea/vomiting                              | Patient-reported symptom as documented by treating clinician                                                                                                       | 0 (0)    |
| No reported symptoms                         | Patient-reported symptom as documented by treating clinician                                                                                                       | 0 (0)    |
| Runny nose (rhinorrhea)                      | Patient-reported symptom as documented by treating clinician                                                                                                       | 0 (0)    |
| Seizures                                     | Patient-reported symptom as documented by treating clinician                                                                                                       | 0 (0)    |
| Shortness of breath (dyspnea)                | Patient-reported symptom as documented by treating clinician                                                                                                       | 0 (0)    |
| Skin rash                                    | Patient-reported symptom as documented by treating clinician                                                                                                       | 0 (0)    |
| Sore throat                                  | Patient-reported symptom as documented by treating clinician                                                                                                       | 0 (0)    |
| Sputum production                            | Patient-reported symptom as documented by treating clinician                                                                                                       | 0 (0)    |
| Wheezing                                     | Patient-reported symptom as documented by treating clinician                                                                                                       | 0 (0)    |
| Current tobacco user                         | Documented current tobacco use                                                                                                                                     | 6 (0)    |
| Current illicit user                         | Documented methamphetamine, opioid or other illicit drug use                                                                                                       | 6 (0)    |
| <b>7-day average incident COVID-19 cases</b> | Daily reported incidence of new cases in health region, averaged over the seven days preceding hospital arrival. Reported in units of new cases/100,000 population | 32 (0.1) |

**Appendix Table 3.** Performance metrics for the CCEDRRN COVID-19 Infection Score for ruling in or ruling out SARS-CoV-2 infection at different score cut-off values in the derivation cohort

| Score            | n (%)        | Sensitivity (%,<br>95% CI) | Specificity (%,<br>95% CI) | LR+   | LR-  | PPV  | NPV  | COVID+<br>n (%) |
|------------------|--------------|----------------------------|----------------------------|-------|------|------|------|-----------------|
| <b>Rule out:</b> |              |                            |                            |       |      |      |      |                 |
| ≤-2              | 51 (0.2)     | 100 (99.6–100)             | 0.25 (0.2–0.3)             | 1.0   | NA   | 4.3  | 100  | 0 (0)           |
| ≤-1              | 937 (4.3)    | 99.89 (99.4–100)           | 4.5 (4.2–4.8)              | 1.1   | <0.1 | 4.5  | 99.9 | 1 (0.1)         |
| ≤0               | 5996 (27.6)  | 96.6 (95.2–97.7)           | 28.67 (28.1–29.3)          | 1.4   | 0.1  | 5.8  | 99.5 | 32 (0.5)        |
| ≤1               | 13114 (60.3) | 86.6 (84.3–88.7)           | 62.43 (61.8–63.1)          | 2.3   | 0.2  | 9.4  | 99.0 | 126 (1.0)       |
| ≤2               | 18041 (83.0) | 67.34 (64.2–70.3)          | 85.25 (84.8–85.7)          | 4.6   | 0.4  | 17.1 | 98.3 | 307 (1.7)       |
| ≤3               | 20405 (93.9) | 45.11 (41.9–48.4)          | 95.61 (95.3–95.9)          | 10.3  | 0.6  | 31.7 | 97.5 | 516 (2.5)       |
| <b>Rule in:</b>  |              |                            |                            |       |      |      |      |                 |
| ≥3               | 3702 (17.0)  | 67.34 (64.2–70.3)          | 85.25 (84.8–85.7)          | 4.6   | 0.4  | 17.1 | 98.3 | 633 (17.1)      |
| ≥4               | 1338 (6.2)   | 45.11 (41.9–48.4)          | 95.61 (95.3–95.9)          | 10.3  | 0.6  | 31.7 | 97.5 | 424 (31.7)      |
| ≥5               | 440 (2.0)    | 23.51 (20.8–26.4)          | 98.95 (98.8–99.1)          | 22.3  | 0.8  | 50.2 | 96.6 | 221 (50.2)      |
| ≥6               | 122 (0.6)    | 9.68 (7.9–11.8)            | 99.85 (99.8–99.9)          | 65.0  | 0.9  | 74.6 | 96.1 | 91 (74.6)       |
| ≥7               | 31 (0.1)     | 2.77 (1.8–4.0)             | 99.98 (99.9–100.0)         | 115.1 | 1.0  | 83.9 | 95.8 | 26 (83.9)       |
| ≥8               | 12 (0.1)     | 1.17 (0.6–2.1)             | 100 (100.0–100.0)          | 243.4 | 1.0  | 91.7 | 95.7 | 11 (91.7)       |
| ≥9               | 2 (<0.1)     | 0.21 (<0.1–0.8)            | 100 (100.0–100.0)          | NA    | 1.0  | 100  | 95.7 | 2 (100)         |

PPV: Positive Predictive Value; NPV: Negative Predictive Value; LR+: Positive Likelihood Ratio; LR-: Negative Likelihood Ratio

**Appendix Table 4.** Performance metrics for CCEDRRN COVID Infection Score for ruling in or ruling out SARS-CoV-2 infection at different score cut-off values in the combined cohort

| Score cutoff     | n (%)        | Sensitivity (95% CI) | Specificity (95% CI) | PPV  | NPV  | LR+   | LR-  | COVID+ n (%) |
|------------------|--------------|----------------------|----------------------|------|------|-------|------|--------------|
| <b>Rule out:</b> |              |                      |                      |      |      |       |      |              |
| ≤-2              | 70 (0.3)     | 100 (99.7,100)       | 0.3 (0.2,0.3)        | 4.2  | 100  | 1     | 0    | 0 (0)        |
| ≤-1              | 1257 (4.5)   | 99.8 (99.4,100)      | 4.7 (4.5,5)          | 4.4  | 99.8 | 1.1   | <0.1 | 2 (0.2)      |
| ≤0               | 7872 (28.5)  | 96.1 (94.8,97.1)     | 29.5 (29.0,30.1)     | 5.7  | 99.4 | 1.4   | 0.1  | 46 (0.6)     |
| ≤1               | 16962 (61.3) | 85 (82.8,87.0)       | 63.4 (62.8,63.9)     | 9.3  | 99.0 | 2.3   | 0.2  | 175 (1.0)    |
| ≤2               | 23243 (84.0) | 64.8 (62.0,67.5)     | 86.2 (85.7,86.6)     | 17.1 | 98.2 | 4.7   | 0.4  | 411 (1.8)    |
| ≤3               | 26169 (94.6) | 40.3 (37.4,43.2)     | 96.1 (95.9,96.4)     | 31.4 | 97.3 | 10.4  | 0.6  | 697 (2.7)    |
| <b>Rule in:</b>  |              |                      |                      |      |      |       |      |              |
| ≥3               | 4422 (16.0)  | 64.8 (62.0,67.5)     | 86.2 (85.7,86.6)     | 17.1 | 98.2 | 4.7   | 0.4  | 756 (17.1)   |
| ≥4               | 1496 (5.4)   | 40.3 (37.4,43.2)     | 96.1 (95.9,96.4)     | 31.4 | 97.3 | 10.4  | 0.6  | 470 (31.4)   |
| ≥5               | 476 (1.7)    | 20.2 (18.0,22.6)     | 99.1 (99.0,99.2)     | 49.6 | 96.6 | 22.3  | 0.8  | 236 (49.6)   |
| ≥6               | 128 (0.5)    | 8 (6.5,9.7)          | 99.9 (99.8,99.9)     | 72.7 | 96.1 | 60.3  | 0.9  | 93 (72.7)    |
| ≥7               | 32 (0.1)     | 2.2 (1.5,3.2)        | 100 (100,100)        | 81.2 | 95.9 | 98.4  | 1.0  | 26 (81.3)    |
| ≥8               | 12 (<0.1)    | 0.9 (0.5,1.7)        | 100 (100,100)        | 91.7 | 95.8 | 249.8 | 1.0  | 11 (91.7)    |
| ≥9               | 2 (<0.1)     | 0.2 (0.0,0.6)        | 100 (100,100)        | 100  | 95.8 | Inf   | 1.0  | 2 (100)      |

TP: True positives; FP: False positives; TN: True negatives; FN: False negatives; PPV: Positive Predictive Value; NPV: Negative Predictive Value; LR+: Positive likelihood ratio; LR-: Negative likelihood ratio



**Appendix Table 5.** Performance metrics for the CORC score (race and ethnicity variables removed) for ruling in or ruling out SARS-CoV-2 infection at different score cut-off values in the combined cohort

| Score            | n (%)        | Sensitivity (95% CI) | Specificity (95% CI) | PPV  | NPV  | LR+   | LR-  | COVID+<br>n (%) |
|------------------|--------------|----------------------|----------------------|------|------|-------|------|-----------------|
| <b>Rule out:</b> |              |                      |                      |      |      |       |      |                 |
| ≤2               | 202 (0.7)    | 99.9 (99.5–100)      | 0.8 (0.7–0.9)        | 4.2  | 99.5 | 1.01  | 0.11 | 1 (0.5)         |
| ≤1               | 2715 (9.8)   | 97.4 (96.4–98.3)     | 10.1 (9.8–10.5)      | 4.6  | 98.9 | 1.08  | 0.25 | 30 (1.1)        |
| ≤0               | 9089 (32.9)  | 90.1 (88.2–91.7)     | 33.9 (33.3–34.4)     | 5.7  | 98.7 | 1.36  | 0.29 | 116 (1.3)       |
| ≤1               | 17582 (63.9) | 72.8 (70.2–75.4)     | 65.2 (64.6–65.7)     | 8.4  | 98.2 | 2.09  | 0.42 | 317 (1.8)       |
| ≤2               | 23421 (84.7) | 51.2 (48.3–54.1)     | 86.2 (85.8–86.7)     | 14.1 | 97.6 | 3.72  | 0.57 | 569 (2.4)       |
| ≤3               | 26224 (94.8) | 27.7 (25.1–30.3)     | 95.8 (95.5–96)       | 22.4 | 96.8 | 6.56  | 0.76 | 844 (3.2)       |
| <b>Rule in:</b>  |              |                      |                      |      |      |       |      |                 |
| ≥3               | 4244 (15.3)  | 51.2 (48.3–54.1)     | 86.2 (85.8–86.7)     | 14.1 | 97.6 | 3.72  | 0.57 | 598<br>(14.1)   |
| ≥4               | 1441 (5.2)   | 27.7 (25.1–30.3)     | 95.8 (95.5–96)       | 22.4 | 96.8 | 6.56  | 0.76 | 323<br>(22.4)   |
| ≥5               | 358 (1.3)    | 11.1 (9.3–13)        | 99.1 (99–99.2)       | 36.0 | 96.2 | 12.79 | 0.9  | 129<br>(36.0)   |
| ≥6               | 54 (0.2)     | 3.1 (2.2–4.2)        | 99.9 (99.9–100)      | 66.7 | 95.9 | 45.41 | 0.97 | 36 (66.7)       |
| ≥7               | 7 (<0.1)     | 0.4 (0.1–1)          | 100 (100–100)        | 71.4 | 95.8 | 56.77 | 1    | 5 (71.4)        |

TP: True positives; FP: False positives; TN: True negatives; FN: False negatives; PPV: Positive Predictive Value; NPV: Negative Predictive Value; LR+: Positive likelihood ratio; LR-: Negative likelihood ratio

**Appendix Table 6.** Net Reclassification Improvement of the CCEDRRN COVID-19 Infection Score compared to the CORC Score (race and ethnicity variables removed)

| <b>Primary Outcome : Covid Positive</b> |               |                           |               |             |              |
|-----------------------------------------|---------------|---------------------------|---------------|-------------|--------------|
| <b>CORC risk category</b>               |               | <b>CCIS risk category</b> |               |             | <b>Total</b> |
|                                         |               | <b>Low</b>                | <b>Medium</b> | <b>High</b> |              |
|                                         | <b>Low</b>    | 12                        | 18            | 0           | 30           |
|                                         | <b>Medium</b> | 34                        | 539           | 241         | 814          |
|                                         | <b>High</b>   | 0                         | 94            | 229         | 323          |
|                                         | <b>Total</b>  | 46                        | 651           | 470         | 1167         |
| <b>Primary Outcome: Covid Negative</b>  |               |                           |               |             |              |
| <b>CORC risk category</b>               |               | <b>CCIS risk category</b> |               |             | <b>Total</b> |
|                                         |               | <b>Low</b>                | <b>Medium</b> | <b>High</b> |              |
|                                         | <b>Low</b>    | 1593                      | 1092          | 0           | 2685         |
|                                         | <b>Medium</b> | 6233                      | 15756         | 706         | 22695        |
|                                         | <b>High</b>   | 0                         | 798           | 320         | 1118         |
|                                         | <b>Total</b>  | 7826                      | 17646         | 1026        | 26498        |

| <b><u>COVID Positive</u></b>             |       | <b><u>COVID Negative</u></b>                 |       |
|------------------------------------------|-------|----------------------------------------------|-------|
| Number of outcomes                       | 1167  | Number of outcomes                           | 26498 |
| Correct reclassification                 | 259   | Correct reclassification                     | 7031  |
| Incorrect reclassification               | 128   | Incorrect reclassification                   | 1798  |
| Net reclassification                     | 131   | Net reclassification                         | 5233  |
| Net reclassification improvement (Event) | 0.112 | Net reclassification improvement (Non-event) | 0.197 |
| Total net reclassification improvement   |       |                                              | 0.310 |

1  
2  
3  
4  
5  
6  
7  
8  
9  
10  
11  
12  
13  
14  
15  
16  
17  
18  
19  
20  
21  
22  
23  
24  
25  
26  
27  
28  
29  
30  
31  
32  
33  
34  
35  
36  
37  
38  
39  
40  
41  
42  
43  
44  
45  
46  
47  
48  
49  
50  
51  
52  
53  
54  
55  
56  
57  
58  
59  
60

**Appendix Figure 1.** Receiver operating characteristic curves for the CCEDRRN COVID Infection Score (CCIS) and the CORC score (race and ethnicity variables removed) in the combined study cohort

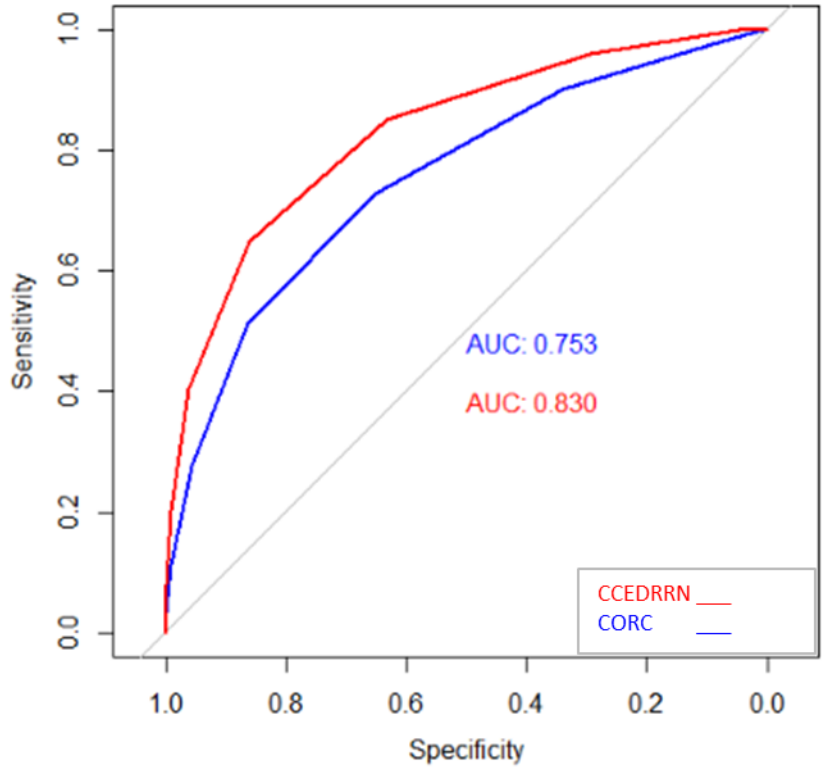

## Supplementary Table: Contributors to the Canadian COVID-19 Emergency Department Rapid Response Network

### 1. Purpose

This supplementary table provides details of the support staff at each of the participating institutions in the Canadian COVID-19 Emergency Department Rapid Response Network. This supplementary document should be attached to each peer-reviewed manuscript after the methods manuscript (M1). The purpose is to ensure research staffs and lead coordinators are appropriately recognized for their contributions to the network.

### 2. List of Support Staff

Table 1. Network coordinating centre staff at the University of British Columbia

| Name              | Roles                | Contributions                                                                                       |
|-------------------|----------------------|-----------------------------------------------------------------------------------------------------|
| Gelareh Ghaderi   | Data analyst         | Data processing and analysis for manuscripts.                                                       |
| Jeffrey Hau       | Data manager         | REDCap, data processing and analysis for manuscripts.                                               |
| Vi Ho             | National coordinator | Coordinate with provincial coordinators and training/onboarding of research assistants.             |
| Joe Larkin        | Project manager      | Project management.                                                                                 |
| Fiona O'Sullivan  | Data analyst         | Data processing and analysis for manuscripts.                                                       |
| Serena Small      | Research coordinator | Ethics & privacy reviews, data management plan, privacy impact assessment, and qualitative analyses |
| Amber Cragg       | Research manager     | Data and manuscript management                                                                      |
| Wei Zhao          | Data analyst         | Data processing and analysis for manuscripts.                                                       |
| Vicky Wu          | Data analyst         | Data processing and analysis for manuscripts.                                                       |
| Elnaz Bodaghkhani | Research associate   | Data and manuscript management                                                                      |

Table 2. Provincial Coordinators

| Name              | Province | Institutional affiliation                                                                                | Contributions to CCEDRRN                                                                        |
|-------------------|----------|----------------------------------------------------------------------------------------------------------|-------------------------------------------------------------------------------------------------|
| Corinne DeMone    | NS       | Dalhousie University, Halifax, Nova Scotia                                                               | Research ethics board submission, manages research assistants, data cleaning and quality.       |
| Jacqueline Fraser | NB       | Dalhousie University, St. John New Brunswick                                                             | Site coordinator as well as research assistant.                                                 |
| Veronique Gélinas | QC       | Centre intégré de santé et de services sociaux de Chaudière-Appalaches (Hôtel-Dieu de Lévis site), Lévis | Provincial research coordinator, translation of research material to French, ethics management. |

|                |    |                                           |                                                                                                  |
|----------------|----|-------------------------------------------|--------------------------------------------------------------------------------------------------|
| Connie Taylor  | ON | Queen's University, Kingston              | Coordination of research assistants in Ontario, maintenance of REB applications for the province |
| Kate Mackenzie | MB | Health Sciences Centre, Winnipeg          | Lead RA for the province                                                                         |
| Aimee Goss     | SK | University of Saskatchewan, Saskatoon     | Screens records in Saskatoon, data/extraction and entry, coordinates research assistants.        |
| Hina Walia     | AB | University of Calgary, Calgary            | Provincial coordinator lead for Alberta, oversight of all Alberta sites.                         |
| Rajan Bola     | BC | University of British Columbia, Vancouver | Provincial coordinator lead for BC, oversight of all BC sites.                                   |

24 Table 3. Institutional research assistant (RA) leads

25 Institutional RA leads are responsible for data extraction and integrity, communication with provincial  
26 leads.

| <b>Name</b>          | <b>Province</b> | <b>Institutional affiliation(s)</b>                                                                                                                                                      |
|----------------------|-----------------|------------------------------------------------------------------------------------------------------------------------------------------------------------------------------------------|
| Corinne DeMone       | NS              | Dartmouth General Hospital, Cobequid Community Health Centre, Hants Community Hospital<br>Secondary Assessment Centers of the Dartmouth General Hospital, and Halifax Infirmary, Halifax |
| Jacqueline Fraser    | NB              | Saint John Regional Hospital, Saint John                                                                                                                                                 |
| Alexandra Nadeau     | QC              | CHU de Québec Université Laval, Quebec City                                                                                                                                              |
| Audrey Nolet         | QC              | Centre intégré de santé et de services sociaux de Chaudière-Appalaches (Hôtel-Dieu de Lévis site), Lévis                                                                                 |
| Xiaoqing Xue         | QC              | Jewish General Hospital, Montréal                                                                                                                                                        |
| David Iannuzzi       | QC              | McGill University Health Center, Montréal                                                                                                                                                |
| Chantal Lanthier     | QC              | Hôpital du Sacré-Cœur de Montréal, Montréal                                                                                                                                              |
| Konika Nirmalanathan | ON              | University Health Network, Toronto                                                                                                                                                       |
| Vlad Latiu           | ON              | Kingston General Hospital, Hotel Dieu Hospital, Kingston                                                                                                                                 |
| Joanna Yeung         | ON              | Sunnybrook Health Sciences Center, Toronto                                                                                                                                               |
| Natasha Clayton      | ON              | Hamilton General Hospital, Juravinski Hospital, Hamilton                                                                                                                                 |
| Tom Chen             | ON              | London Health Sciences Centre, London                                                                                                                                                    |
| Jenna Nichols        | ON              | Health Sciences North, Sudbury                                                                                                                                                           |
| Kate Mackenzie       | MB              | Health Sciences Centre, Winnipeg                                                                                                                                                         |
| Aimee Goss           | SK              | St. Paul's Hospital, Royal University Hospital, Saskatoon City Hospital, Saskatoon                                                                                                       |
| Stacy Ruddell        | AB              | Foothills Medical Centre, Peter Lougheed Centre, Rockyview General Hospital, South Health Campus, Calgary                                                                                |
| Natalie Runham       | AB              | University of Alberta Hospital, Edmonton                                                                                                                                                 |

| Name             | Province | Institutional affiliation(s)                                         |
|------------------|----------|----------------------------------------------------------------------|
| Karlin Su        | AB       | Royal Alexandra Hospital/Northeast Community Health Center, Edmonton |
| Josie Kanu       | BC       | St. Paul's Hospital, Mount Saint Joseph, Vancouver                   |
| Bernice Huynh    | BC       | Abbotsford Regional Hospital and Cancer Center, Abbotsford           |
| Amanda Swirhun   | BC       | Royal Columbian Hospital, New Westminster                            |
| Tracy Taylor     | BC       | Eagle Ridge Hospital and Health Care Centre, Port Moody              |
| Mai Hayashi      | BC       | Royal Inland Hospital, Kamloops                                      |
| Mackenzie Cheyne | BC       | Kelowna General Hospital, Kelowna                                    |
| Sarim Asim       | BC       | Surrey Memorial Hospital, Surrey                                     |
| Katherine Lam    | BC       | Vancouver General Hospital, Vancouver                                |
| Kelsey Compagna  | BC       | Lions Gate Hospital, Vancouver                                       |

23 Table 4. Contributing Study Sites and Investigators

| Lead Investigator    | Contributing Site / Code                                                     | Member Investigators |
|----------------------|------------------------------------------------------------------------------|----------------------|
| <b>Maritime</b>      |                                                                              |                      |
| Patrick Fok          |                                                                              |                      |
| <b>Nova Scotia</b>   |                                                                              |                      |
| Hana Wiemer          | Halifax Infirmary/ 902                                                       | Patrick Fok          |
|                      | Dartmouth General Hospital/ 903                                              | Hana Wiemer          |
|                      | Hants Community Hospital/ 904                                                | Samuel Campbell      |
|                      | Cobequid Community Health Centre/ 905                                        | Kory Arsenault       |
|                      | Secondary Assessment Centers of Dartmouth General and Halifax Infirmary/ 908 | Tara Dahn            |
| <b>New Brunswick</b> |                                                                              |                      |
| Kavish Chandra       | Saint John Regional Hospital/ 901                                            | Kavish Chandra       |
| <b>Quebec</b>        |                                                                              |                      |
| Patrick Archambault  | Hotel-Dieu de Lévis/ 701                                                     | Patrick Archambault  |
|                      | Jewish General Hospital/ 702                                                 | Joel Turner          |
|                      | Centre Hospitalier de l'Université Laval (CHU de Québec)/ 703                | Éric Mercier         |
|                      | L'hôpital Royal Victoria - Royal Victoria Hospital/ 705                      | Greg Clark           |
|                      | Hôpital de l'Enfant-Jésus, CHU de Québec/ 706                                | Éric Mercier         |
|                      | Hôpital du Saint-Sacrement, CHU de Québec/ 707                               | Éric Mercier         |
|                      | Hôpital Saint-François d'Assise, CHU de Québec/ 708                          | Éric Mercier         |
|                      | Hôtel-Dieu de Québec, CHU de Québec/ 709                                     | Éric Mercier         |

|                                 |                                                                               |                                 |
|---------------------------------|-------------------------------------------------------------------------------|---------------------------------|
|                                 | IUCPQ: Institut universitaire de cardiologie et de pneumologie de Québec/ 710 | Sébastien Robert                |
|                                 | Hôpital du Sacré-Coeur de Montreal/ 711                                       | Raoul Daoust                    |
| <b>Ontario</b>                  |                                                                               |                                 |
| Laurie Morrison & Steven Brooks | Sunnybrook/ 401                                                               | Ivy Cheng                       |
|                                 | The Ottawa Hospital - Civic Campus/ 403                                       | Krishan Yadav                   |
|                                 | The Ottawa Hospital - General Campus/ 404                                     | Krishan Yadav                   |
|                                 | Kingston/Queens/ 406                                                          | Steven Brooks                   |
|                                 | Hamilton General Hospital/ 407                                                | Michelle Welsford               |
|                                 | Health Science North, Sudbury Ontario/ 408                                    | Rob Ohle                        |
|                                 | University Hospital – LHSC/ 409                                               | Justin Yan                      |
|                                 | North York General Hospital, Toronto/ 410                                     | Rohit Mohindra                  |
|                                 | Victoria Hospital – LHSC/ 412                                                 | Justin Yan                      |
|                                 | Toronto Western Hospital/ 414                                                 | Megan Landes                    |
| <b>Manitoba</b>                 |                                                                               |                                 |
| Tomislav Jelic                  | Health Sciences Centre/ 307                                                   | Tomislav Jelic                  |
| <b>Saskatchewan</b>             |                                                                               |                                 |
| Phil Davis                      | Pasqua Hospital, Regina/ 301                                                  | Ankit Kapur                     |
|                                 | Regina General Hospital, Regina/ 302                                          | Ankit Kapur                     |
|                                 | St Paul's Hospital, Saskatoon/ 303                                            | Phil Davis                      |
|                                 | Royal University, Saskatoon/ 304                                              | Phil Davis                      |
|                                 | Saskatoon City Hospital, Saskatoon/ 305                                       | Phil Davis                      |
| <b>Alberta</b>                  |                                                                               |                                 |
| Andrew McRae                    | University of Alberta Hospital, Edmonton/ 201                                 | Brian Rowe                      |
|                                 | Foothills, Calgary/ 202                                                       | Katie Lin                       |
|                                 | Rockyview, Calgary/ 203                                                       | Andrew McRae                    |
|                                 | Peter Lougheed Centre/ 204                                                    | Andrew McRae                    |
|                                 | South Campus, Calgary/ 205                                                    | Stephanie VandenBerg            |
|                                 | Northeast Community Health Centre, Edmonton/ 206                              | Jake Hayward, Jaspreet Khangura |
|                                 | Royal Alexandra Hospital, Edmonton/ 306                                       | Jake Hayward, Jaspreet Khangura |
| <b>British Columbia</b>         |                                                                               |                                 |
| Corinne Hohl                    | Vancouver General Hospital/ 101                                               | Daniel Ting                     |
|                                 | Lions Gate Hospital/ 102                                                      | Maja Stachura                   |
|                                 | Saint Paul's Hospital/ 103                                                    | Frank Scheuermeyer              |

|                                   |                              |
|-----------------------------------|------------------------------|
| Mount St Joseph's/ 104            | Frank Scheuermeyer           |
| Surrey Memorial Hospital/ 105     | Balijeet Braar/ Craig Murray |
| Royal Columbian Hospital/ 106     | John Taylor                  |
| Abbotsford Regional Hospital/ 107 | Ian Martin                   |
| Eagle Ridge Hospital/ 108         | Sean Wormsbecker             |
| Victoria General Hospital/ 109    | Matt Bouchard                |
| Royal Jubilee Hospital/ 110       | Matt Bouchard                |
| Nanaimo General Hospital/ 111     | Matt Bouchard                |
| Royal Inland Hospital/ 112        | Ian Martin                   |
| Kelowna General / Hospital/ 115   | Lee Graham                   |

It was not possible for us to recruit Members from Newfoundland and Labrador, Northwest Territories, Nunavut, Prince Edward Island and Yukon at the time of the inception of the registry.



## TRIPOD Checklist: Prediction Model Development and Validation

| Section/Topic                | Item | Checklist Item                                                                                                                                                                                            | Page                      |
|------------------------------|------|-----------------------------------------------------------------------------------------------------------------------------------------------------------------------------------------------------------|---------------------------|
| <b>Title and abstract</b>    |      |                                                                                                                                                                                                           |                           |
| Title                        | 1    | D;V Identify the study as developing and/or validating a multivariable prediction model, the target population, and the outcome to be predicted.                                                          | 1                         |
| Abstract                     | 2    | D;V Provide a summary of objectives, study design, setting, participants, sample size, predictors, outcome, statistical analysis, results, and conclusions.                                               | 2                         |
| <b>Introduction</b>          |      |                                                                                                                                                                                                           |                           |
| Background and objectives    | 3a   | D;V Explain the medical context (including whether diagnostic or prognostic) and rationale for developing or validating the multivariable prediction model, including references to existing models.      | 3                         |
|                              | 3b   | D;V Specify the objectives, including whether the study describes the development or validation of the model or both.                                                                                     | 4                         |
| <b>Methods</b>               |      |                                                                                                                                                                                                           |                           |
| Source of data               | 4a   | D;V Describe the study design or source of data (e.g., randomized trial, cohort, or registry data), separately for the development and validation data sets, if applicable.                               | 4                         |
|                              | 4b   | D;V Specify the key study dates, including start of accrual; end of accrual; and, if applicable, end of follow-up.                                                                                        | Appendix table 2          |
| Participants                 | 5a   | D;V Specify key elements of the study setting (e.g., primary care, secondary care, general population) including number and location of centres.                                                          | 5                         |
|                              | 5b   | D;V Describe eligibility criteria for participants.                                                                                                                                                       | 5                         |
|                              | 5c   | D;V Give details of treatments received, if relevant.                                                                                                                                                     | N/A                       |
| Outcome                      | 6a   | D;V Clearly define the outcome that is predicted by the prediction model, including how and when assessed.                                                                                                | 6                         |
|                              | 6b   | D;V Report any actions to blind assessment of the outcome to be predicted.                                                                                                                                | 5                         |
| Predictors                   | 7a   | D;V Clearly define all predictors used in developing or validating the multivariable prediction model, including how and when they were measured.                                                         | Appendix Table 2          |
|                              | 7b   | D;V Report any actions to blind assessment of predictors for the outcome and other predictors.                                                                                                            | 5                         |
| Sample size                  | 8    | D;V Explain how the study size was arrived at.                                                                                                                                                            | 7                         |
| Missing data                 | 9    | D;V Describe how missing data were handled (e.g., complete-case analysis, single imputation, multiple imputation) with details of any imputation method.                                                  | 7                         |
| Statistical analysis methods | 10a  | D Describe how predictors were handled in the analyses.                                                                                                                                                   | 7                         |
|                              | 10b  | D Specify type of model, all model-building procedures (including any predictor selection), and method for internal validation.                                                                           | 7-8                       |
|                              | 10c  | V For validation, describe how the predictions were calculated.                                                                                                                                           | 9                         |
|                              | 10d  | D;V Specify all measures used to assess model performance and, if relevant, to compare multiple models.                                                                                                   | 8,9                       |
|                              | 10e  | V Describe any model updating (e.g., recalibration) arising from the validation, if done.                                                                                                                 | n/a                       |
| Risk groups                  | 11   | D;V Provide details on how risk groups were created, if done.                                                                                                                                             | 10                        |
| Development vs. validation   | 12   | V For validation, identify any differences from the development data in setting, eligibility criteria, outcome, and predictors.                                                                           | 8                         |
| <b>Results</b>               |      |                                                                                                                                                                                                           |                           |
| Participants                 | 13a  | D;V Describe the flow of participants through the study, including the number of participants with and without the outcome and, if applicable, a summary of the follow-up time. A diagram may be helpful. | Figure 1                  |
|                              | 13b  | D;V Describe the characteristics of the participants (basic demographics, clinical features, available predictors), including the number of participants with missing data for predictors and outcome.    | Table 1, Appendix table 2 |
|                              | 13c  | V For validation, show a comparison with the development data of the distribution of important variables (demographics, predictors and outcome).                                                          | Table 1                   |
| Model development            | 14a  | D Specify the number of participants and outcome events in each analysis.                                                                                                                                 | 10                        |
|                              | 14b  | D If done, report the unadjusted association between each candidate predictor and outcome.                                                                                                                | n/a                       |
| Model specification          | 15a  | D Present the full prediction model to allow predictions for individuals (i.e., all regression coefficients, and model intercept or baseline survival at a given time point).                             | Table 2                   |
|                              | 15b  | D Explain how to use the prediction model.                                                                                                                                                                | Table 2                   |
| Model performance            | 16   | D;V Report performance measures (with CIs) for the prediction model.                                                                                                                                      | 10                        |
| Model-updating               | 17   | V If done, report the results from any model updating (i.e., model specification, model performance).                                                                                                     | n/a                       |
| <b>Discussion</b>            |      |                                                                                                                                                                                                           |                           |
| Limitations                  | 18   | D;V Discuss any limitations of the study (such as nonrepresentative sample, few events per predictor, missing data).                                                                                      | 14                        |
| Interpretation               | 19a  | V For validation, discuss the results with reference to performance in the development data, and any other validation data.                                                                               | 12-13                     |
|                              | 19b  | D;V Give an overall interpretation of the results, considering objectives, limitations, results from similar studies, and other relevant evidence.                                                        | 14                        |
| Implications                 | 20   | D;V Discuss the potential clinical use of the model and implications for future research.                                                                                                                 | 14                        |
| <b>Other information</b>     |      |                                                                                                                                                                                                           |                           |
| Supplementary information    | 21   | D;V Provide information about the availability of supplementary resources, such as study protocol, Web calculator, and data sets.                                                                         | 16                        |

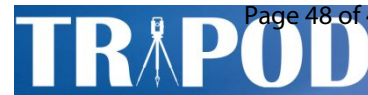

TRIPOD Checklist: Prediction Model Development and Validation

|         |    |     |                                                                               |   |
|---------|----|-----|-------------------------------------------------------------------------------|---|
| Funding | 22 | D;V | Give the source of funding and the role of the funders for the present study. | 2 |
|---------|----|-----|-------------------------------------------------------------------------------|---|

\*Items relevant only to the development of a prediction model are denoted by D, items relating solely to a validation of a prediction model are denoted by V, and items relating to both are denoted D;V. We recommend using the TRIPOD Checklist in conjunction with the TRIPOD Explanation and Elaboration document.

For peer review only

1  
2  
3  
4  
5  
6  
7  
8  
9  
10  
11  
12  
13  
14  
15  
16  
17  
18  
19  
20  
21  
22  
23  
24  
25  
26  
27  
28  
29  
30  
31  
32  
33  
34  
35  
36  
37  
38  
39  
40  
41  
42  
43  
44  
45  
46  
47  
48  
49  
50  
51  
52  
53  
54  
55  
56  
57  
58  
59  
60

# BMJ Open

## The CCEDRRN COVID-19 Infection Score (CCIS): development and validation in a Canadian cohort of a clinical risk score to predict SARS-CoV-2 infection in patients presenting to the emergency department with suspected COVID-19

|                                 |                                                                                                                                                                                                                                                                                                                                                                                                                                                                                                                                                                                                                                                                                                                                                                                                                                                                                                                                                                                                                                                                                                                                                                                                                                                                                                                                                                                                                                                                                       |
|---------------------------------|---------------------------------------------------------------------------------------------------------------------------------------------------------------------------------------------------------------------------------------------------------------------------------------------------------------------------------------------------------------------------------------------------------------------------------------------------------------------------------------------------------------------------------------------------------------------------------------------------------------------------------------------------------------------------------------------------------------------------------------------------------------------------------------------------------------------------------------------------------------------------------------------------------------------------------------------------------------------------------------------------------------------------------------------------------------------------------------------------------------------------------------------------------------------------------------------------------------------------------------------------------------------------------------------------------------------------------------------------------------------------------------------------------------------------------------------------------------------------------------|
| Journal:                        | <i>BMJ Open</i>                                                                                                                                                                                                                                                                                                                                                                                                                                                                                                                                                                                                                                                                                                                                                                                                                                                                                                                                                                                                                                                                                                                                                                                                                                                                                                                                                                                                                                                                       |
| Manuscript ID                   | bmjopen-2021-055832.R1                                                                                                                                                                                                                                                                                                                                                                                                                                                                                                                                                                                                                                                                                                                                                                                                                                                                                                                                                                                                                                                                                                                                                                                                                                                                                                                                                                                                                                                                |
| Article Type:                   | Original research                                                                                                                                                                                                                                                                                                                                                                                                                                                                                                                                                                                                                                                                                                                                                                                                                                                                                                                                                                                                                                                                                                                                                                                                                                                                                                                                                                                                                                                                     |
| Date Submitted by the Author:   | 13-Oct-2021                                                                                                                                                                                                                                                                                                                                                                                                                                                                                                                                                                                                                                                                                                                                                                                                                                                                                                                                                                                                                                                                                                                                                                                                                                                                                                                                                                                                                                                                           |
| Complete List of Authors:       | McRae, Andrew; University of Calgary Cumming School of Medicine, Emergency Medicine<br>Hohl, Corinne M.; The University of British Columbia Faculty of Medicine, Emergency Medicine<br>Rosychuk, Rhonda; University of Alberta Faculty of Medicine & Dentistry, Paediatrics<br>Vatanpour, Shabnam; University of Calgary Cumming School of Medicine, Emergency Medicine<br>Ghaderi, Gelareh; The University of British Columbia Faculty of Medicine, Emergency Medicine<br>Archambault, Patrick M.; Universite Laval Faculte de medecine, Emergency Medicine<br>Brooks, Steven C.; Queen's University School of Medicine, Emergency Medicine<br>Cheng, Ivy; Sunnybrook Health Sciences Centre, Emergency Medicine<br>Davis, Philip; University of Saskatchewan College of Medicine, Emergency Medicine<br>Hayward, Jake; University of Alberta Faculty of Medicine & Dentistry, Emergency Medicine<br>Lang, Eddy; University of Calgary Cumming School of Medicine, Emergency Medicine<br>Ohle, Robert; Northern Ontario School of Medicine, Emergency Medicine<br>Rowe, Brian; University of Alberta Faculty of Medicine & Dentistry, Emergency Medicine<br>Welsford, Michelle; McMaster University Faculty of Health Sciences, Emergency Medicine<br>Yadav, Krishan; University of Ottawa Faculty of Medicine, Emergency Medicine<br>Morrison, Laurie J.; St Michael's Hospital, Emergency Medicine<br>Perry, Jeffrey; University of Ottawa Faculty of Medicine, Emergency Medicine |
| <b>Primary Subject Heading</b>: | Emergency medicine                                                                                                                                                                                                                                                                                                                                                                                                                                                                                                                                                                                                                                                                                                                                                                                                                                                                                                                                                                                                                                                                                                                                                                                                                                                                                                                                                                                                                                                                    |
| Secondary Subject Heading:      | Epidemiology, Infectious diseases                                                                                                                                                                                                                                                                                                                                                                                                                                                                                                                                                                                                                                                                                                                                                                                                                                                                                                                                                                                                                                                                                                                                                                                                                                                                                                                                                                                                                                                     |

1  
2  
3  
4  
5  
6  
7  
8  
9  
10  
11  
12  
13  
14  
15  
16  
17  
18  
19  
20  
21  
22  
23  
24  
25  
26  
27  
28  
29  
30  
31  
32  
33  
34  
35  
36  
37  
38  
39  
40  
41  
42  
43  
44  
45  
46  
47  
48  
49  
50  
51  
52  
53  
54  
55  
56  
57  
58  
59  
60

|           |                                                       |
|-----------|-------------------------------------------------------|
| Keywords: | COVID-19, ACCIDENT & EMERGENCY MEDICINE, EPIDEMIOLOGY |
|           |                                                       |

SCHOLARONE™  
Manuscripts

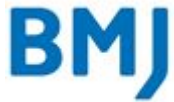

I, the Submitting Author has the right to grant and does grant on behalf of all authors of the Work (as defined in the below author licence), an exclusive licence and/or a non-exclusive licence for contributions from authors who are: i) UK Crown employees; ii) where BMJ has agreed a CC-BY licence shall apply, and/or iii) in accordance with the terms applicable for US Federal Government officers or employees acting as part of their official duties; on a worldwide, perpetual, irrevocable, royalty-free basis to BMJ Publishing Group Ltd ("BMJ") its licensees and where the relevant Journal is co-owned by BMJ to the co-owners of the Journal, to publish the Work in this journal and any other BMJ products and to exploit all rights, as set out in our [licence](#).

The Submitting Author accepts and understands that any supply made under these terms is made by BMJ to the Submitting Author unless you are acting as an employee on behalf of your employer or a postgraduate student of an affiliated institution which is paying any applicable article publishing charge ("APC") for Open Access articles. Where the Submitting Author wishes to make the Work available on an Open Access basis (and intends to pay the relevant APC), the terms of reuse of such Open Access shall be governed by a Creative Commons licence – details of these licences and which [Creative Commons](#) licence will apply to this Work are set out in our licence referred to above.

Other than as permitted in any relevant BMJ Author's Self Archiving Policies, I confirm this Work has not been accepted for publication elsewhere, is not being considered for publication elsewhere and does not duplicate material already published. I confirm all authors consent to publication of this Work and authorise the granting of this licence.

1  
2  
3 **The CCEDRRN COVID-19 Infection Score (CCIS): development and validation in a**  
4 **Canadian cohort of a clinical risk score to predict SARS-CoV-2 infection in patients**  
5 **presenting to the emergency department with suspected COVID-19**  
6  
7

8 Andrew D McRae, MD<sup>1</sup> & Corinne M Hohl, MD<sup>2</sup> (co-first authors), Rhonda J Rosychuk, PhD<sup>3</sup>,  
9 Shabnam Vatanpour, PhD<sup>1</sup>, Gelareh Ghaderi, MSc<sup>2</sup>, Patrick M Archambault, MD<sup>4</sup>, Steven C  
10 Brooks, MD<sup>5</sup>, Ivy Cheng, MD<sup>6</sup>, Philip Davis, MD<sup>7</sup>, Jake Hayward, MD<sup>8</sup>, Eddy S Lang, MD<sup>2</sup>,  
11 Robert Ohle, MD<sup>9</sup>, Brian H. Rowe, MD<sup>8</sup>, Michelle Welsford, MD<sup>10</sup>, Krishan Yadav,  
12 MD<sup>11</sup>, Laurie J Morrison, MD<sup>\*6,12</sup> Jeffrey J. Perry, MD<sup>\*11</sup>, and the Canadian COVID-19  
13 Emergency Department Rapid Response Network (CCEDRRN) investigators for the Network of  
14 Canadian Emergency Researchers and the Canadian Critical Care Trials Group.  
15  
16

- 17  
18 1. Departments of Emergency Medicine and Community Health Sciences, University of  
19 Calgary, Foothills Medical Center, 1403 29 St NW, Calgary AB T2N 0K8  
20 2. Department of Emergency Medicine, University of British Columbia, 2775 Laurel St,  
21 Vancouver BC, V5Z 1M9  
22 3. Department of Paediatrics, University of Alberta, 11405 87 Avenue NW, Edmonton AB T6G  
23 1C9  
24 4. Department of Family Medicine and Emergency Medicine, Université Laval, Pavillion  
25 Ferdinand-Vandry Local 4617, Québec QC, G1V 0A6  
26 5. Department of Emergency Medicine, Queen's University, 76 Stuart St, Kingston ON, K7L  
27 2V7  
28 6. Division of Emergency Medicine, Department of Medicine, University of Toronto, 6 Queen's  
29 Park Cres W, Toronto Ontario, M5S 3H2  
30 7. Department of Emergency Medicine, University of Saskatchewan, 107 Wiggins Rd,  
31 Saskatoon SK, S7N 5E5  
32 8. Department of Emergency Medicine, University of Alberta, 8440 112 St NW, Edmonton AB,  
33 T6G 2R7  
34 9. Department of Emergency Medicine, Northern Ontario School of Medicine, 41 Ramsey Lake  
35 Rd, Sudbury ON, P3E 5J1  
36 10. Division of Emergency Medicine, McMaster University, 100 Main St W, Hamilton ON, L8P  
37 1H6  
38 11. Department of Emergency Medicine, University of Ottawa, 1053 Carling Ave, Ottawa ON,  
39 K1Y 4E9  
40 12. Rescu, Li Ka Shing Knowledge Institute, Department of Emergency Medicine, St Michael's  
41 Hospital, Unity Health Toronto, 30 Bond St., Toronto ON M5B 1W8.  
42  
43  
44  
45

46 **\*co-senior author**  
47  
48

49 **Corresponding Author:**

50 Andrew D. McRae  
51 Department of Emergency Medicine  
52 Rm C231 Foothills Medical Centre  
53 1403 29 St NW. Calgary, AB, Canada. T2N 2T9  
54 [Amcrae@ucalgary.ca](mailto:Amcrae@ucalgary.ca)  
55  
56  
57  
58  
59  
60

Tel. (403) 210-8835

For peer review only

1  
2  
3 **Abstract** (283/300 words)  
4

5 **Objectives:** To develop and validate a clinical risk score that can accurately quantify the  
6 probability of SARS-CoV-2 infection in patients presenting to an emergency department without  
7 the need for laboratory testing  
8

9 **Design:** Cohort study of participants in the Canadian COVID-19 Emergency Department Rapid  
10 Response Network (CCEDRRN) registry. Regression models were fitted to predict a positive  
11 SARS-CoV-2 test result using clinical and demographic predictors, as well as an indicator of  
12 local SARS-CoV-2 incidence.  
13  
14

15 **Setting:** 32 emergency departments in eight Canadian provinces  
16

17 **Participants:** 27,665 consecutively-enrolled patients who were tested for SARS-CoV-2 in  
18 participating emergency departments between March 1-October 30,2020  
19

20 **Main outcome measures:** Positive SARS-CoV-2 nucleic acid test result within 14 days of an  
21 index emergency department encounter for suspected COVID-19 disease  
22

23 **Results:** We derived a 10-item CCEDRRN COVID-19 Infection Score using data from 21,743  
24 patients. This score included variables from history and physical examination, and an indicator  
25 of local disease incidence. The score had a c-statistic of 0.838 with excellent calibration. We  
26 externally validated the rule in 5,295 patients. The score maintained excellent discrimination and  
27 calibration, and had superior performance compared to another previously published risk score.  
28 Score cutoffs were identified that can rule-in or rule-out SARS-CoV-2 infection without the need  
29 for nucleic acid testing with 97.4 % sensitivity (95% CI 96.4–98.3) and 95.9% specificity (95%  
30 CI 95.5-96.0).  
31  
32

33 **Conclusions** The CCEDRRN COVID-19 Infection Score uses clinical characteristics and  
34 publicly available indicators of disease incidence to quantify a patient's probability of SARS-  
35 CoV-2 infection. The score can identify patients at sufficiently high risk of SARS-CoV-2  
36 infection to warrant isolation and empiric therapy prior to test confirmation, while also  
37 identifying patients at sufficiently low risk of infection that they may not need testing.  
38  
39

40 **Trial registration:** CCEDRRN is registered at [clinicaltrials.gov](https://clinicaltrials.gov) (NCT04702945).  
41

42 **Funding:**  
43

44 The Canadian Institutes of Health Research (447679), Ontario Ministry of Colleges and  
45 Universities (C-655-2129), Saskatchewan Health Research Foundation (5357), Genome BC  
46 (COV024 and VAC007) Fondation du CHU de Québec (Octroi No. 4007) Sero-Surveillance and  
47 Research (COVID-19 Immunity Task Force Initiative) provided peer-reviewed funding. The BC  
48 Academic Health Science Network and BioTalent Canada provided non-peer reviewed funding.  
49 These organizations are not-for-profit, and had no role in study conduct, analysis, or  
50 manuscript preparation.  
51  
52  
53  
54  
55  
56  
57  
58  
59  
60



### *Strengths and Limitations of this Study*

- Patients were enrolled in a large, geographically distributed network of Canadian urban, regional, and rural emergency departments, with strict data quality and cleaning protocols to ensure reliability of collected data.
- In addition to clinical variables, we also included the average daily incidence of SARS-CoV-2 infections in a patient's health region, which is an essential predictor of the probability of a patient's risk of COVID infection.
- Some missing data required either multiple imputation or classification of missing categorical variables as being absent, but the overall missingness of data in this registry is very low.
- Although the data collection for the CCEDRRN registry relies on abstraction from health records, this approach has been shown to be reliable in our study sites when compared to prospective data collection.
- This risk score was developed using data from patients enrolled in the first nine months of the pandemic when rates of influenza were low, so the score may need to be re-validated and refined in the future to reflect the influence of influenza, the emergence of variant strains of SARS-CoV-2, and widespread population immunization on patients' risk of infection.

## MAIN DOCUMENT (3186 words)

### Introduction

To date, the World Health Organization has reported 190 million diagnosed cases of coronavirus 2019 disease (COVID-19) with 4.2 million fatalities.<sup>1</sup> Despite the availability of vaccines to prevent COVID-19, incomplete population-level immunization and the emergence of variants of concern means that hospitals around the world need to continue to identify and isolate patients with suspected COVID-19 from the time they arrive in the emergency department until their SARS-CoV-2 test results are available. In acutely ill patients, clinicians may need to initiate empiric therapy immediately. A quantitative risk score that can accurately predict the probability of a positive SARS-CoV-2 test result would guide initial isolation and empiric therapy prior to nucleic acid amplification test (NAAT) test result availability, while identifying patients with sufficiently low probability of COVID-19 who may not require testing or isolation.

Many risk prediction tools have been developed to predict the probability of SARS-CoV-2 infection.<sup>2-14</sup> A living systematic review of these models concluded that most were generated using poor methodological approaches and none were ready for widespread use.<sup>2</sup> Most published risk prediction tools, including one identified as promising by the living systematic review, included early laboratory or imaging findings, thus precluding their utility to guide immediate isolation and clinical decisions at the time of first clinical contact. Other risk prediction tools using machine learning included laboratory and imaging results and can only be implemented in hospitals using electronic health records with integrated decision support. None of these models accounted for the prevalence of COVID-19 disease in the local population, which is an important risk predictor, and most only included patients from the early stages of the pandemic.<sup>2</sup>

1  
2  
3 The objective of this study is to develop a clinical risk score to predict the probability of a  
4 positive SARS-CoV-2 nucleic acid test in a large, generalizable population of patients presenting  
5 to emergency departments using only clinical characteristics and indicators of local SARS-CoV-  
6 2 incidence. This risk score is intended to guide SARS-CoV-2 testing, isolation, and empiric  
7 therapy decisions without relying on other laboratory testing or diagnostic imaging. This score  
8 could be invaluable in settings that may not have access to adequate resources for timely SARS-  
9 CoV-2 testing.  
10  
11  
12  
13  
14  
15  
16  
17  
18  
19

## 20 **Methods**

21  
22 This analysis uses data from the Canadian COVID-19 Emergency Department Rapid Response  
23 Network (CCEDRRN, pronounced “SED-rin”). CCEDRRN is an ongoing multicenter, pan-  
24 Canadian registry that has been enrolling consecutive patients presenting to emergency  
25 departments with suspected COVID-19 disease in hospitals in eight of ten Canadian provinces  
26 since March 1, 2020.<sup>15</sup> Information on the network, including detailed methods and participating  
27 sites, is available elsewhere.<sup>15</sup> Sites and enrolment periods are shown in the supplementary  
28 appendix, Table 1. Additional information on network sites is available in the Network  
29 Appendix. This study follows the methodological and reporting recommendations outlined in the  
30 Transparency in reporting of a multivariable prediction model for individual diagnosis and  
31 prognosis (TRIPOD) criteria.<sup>16</sup> The CCEDRRN data collection form includes prespecified  
32 demographic and social variables, vital signs, symptoms, and comorbid conditions (derived from  
33 the International Severe Acute Respiratory and Emerging Infection Consortium (ISARIC)  
34 reporting form),<sup>17,18</sup> exposure risk variables, hospital laboratory and diagnostic imaging test  
35 results, SARS-CoV-2 NAAT results, and patient outcomes. Data were abstracted at each site  
36 using electronic medical record extraction where available as well as manual review of either  
37  
38  
39  
40  
41  
42  
43  
44  
45  
46  
47  
48  
49  
50  
51  
52  
53  
54  
55  
56  
57  
58  
59  
60

1  
2  
3 electronic or paper charts (depending on site-specific documentation practices) by trained  
4  
5 research assistants who were blinded to the potential predictor variables at the time of data  
6  
7 collection. Reliability of health record data abstraction was evaluated by comparison with  
8  
9 prospective data collection in a sample of patients and found to be reliable.<sup>15</sup>  
10  
11

12  
13 Each consecutive, eligible patient enrolled in the registry was assigned a CCEDRRN unique  
14  
15 identifier. Trained research assistants entered anonymized participant data into a REDCap  
16  
17 database (Version 10.9.4; Vanderbilt University, Nashville, Tennessee, USA). Regular data  
18  
19 quality checks including verification of extreme or outlying values were performed by each  
20  
21 participating site, coordinated by the CCEDRRN coordinating center.  
22  
23

### 24 25 *Participants*

26  
27  
28 We included data from consecutive patients tested for SARS-CoV-2 at 32 CCEDRRN sites.  
29  
30 From each site's start date forward, we included consecutive eligible patients aged 18 and older  
31  
32 who had a biological sample (swab, endotracheal aspirate, bronchoalveolar lavage) specimen  
33  
34 collected for NAAT on their index emergency department visit or, if admitted, within 24h of  
35  
36 emergency department arrival. For patients with multiple emergency department encounters  
37  
38 involving COVID-19 testing, we only used the first encounter in this analysis.  
39  
40

41  
42 We excluded patients who had a positive SARS-CoV-2 NAAT within 14 days prior to their  
43  
44 emergency department visit, patients with cardiac arrest prior to emergency department arrival,  
45  
46 and those with missing outcome data.  
47  
48

### 49 50 *Predictors*

51  
52 Candidate predictors were chosen based on clinical consensus and availability within the  
53  
54 CCEDRRN registry. Predictors included known risk factors for SARS-CoV-2 infection,  
55  
56  
57  
58  
59  
60

1  
2  
3 including work as a healthcare provider, institutional living (i.e., long term care, prison), close  
4 personal or household contacts with SARS-CoV-2 infection; symptoms including cough,  
5 anosmia or dysgeusia, fever, myalgias and vital signs on emergency department arrival. The full  
6 list of candidate variables, and their definitions are available in the supplementary appendix  
7 (Appendix Table 2).  
8  
9  
10  
11  
12  
13

14  
15 In addition to these clinical variables, the seven-day average incident COVID-19 case count was  
16 calculated for the health region of each participating site using publicly available  
17 epidemiological data.<sup>19</sup> For each calendar day within each health region represented in the study,  
18 we calculated the average daily incident rate of new infections per 100,000 population over the  
19 preceding seven days. This seven-day average incidence was assigned to each patient based on  
20 the date of their index emergency department encounter and the health region of the forward  
21 sortation area of their postal code of residence. For patients with no fixed address, we allocated  
22 them to the health region of the hospital in which they were tested. As publicly available incident  
23 COVID-19 case data were not available for the early pandemic, we imputed values for the first  
24 five weeks of the pandemic by modeling the reported COVID-19 cases that had accumulated in  
25 every health region over time using linear interpolation (0.1% missing).  
26  
27  
28  
29  
30  
31  
32  
33  
34  
35  
36  
37  
38  
39  
40

#### 41 *Outcome*

42  
43 The primary outcome of this analysis was the diagnosis of SARS-CoV-2 infection using a  
44 criterion standard of a positive NAAT at the time of index emergency department visit or within  
45 14 days after the index encounter.  
46  
47  
48  
49  
50

#### 51 *Sample size and precision*

52  
53 The 46 candidate predictors had 52 degrees of freedom and with an expected SARS-CoV-2  
54 infection rate of 5%, a sample size of 1040 was sufficient for the derivation cohort based on an  
55  
56  
57  
58  
59  
60

1  
2  
3 anticipated event rate of less than 20% and a requirement for 20 outcomes per degree of  
4 freedom.<sup>20</sup> Over 21,000 patients were available for the derivation cohort at the time of analysis,  
5  
6 providing more than sufficient data for reliable prediction modeling.  
7  
8  
9

### 10 *Model development and validation*

11  
12 We randomly assigned study sites to the derivation and validation cohorts with the goal of  
13 assigning 75% of eligible patients and outcome events to the derivation cohort and 25% to the  
14 validation cohort. Thus, the derivation and validation cohorts are geographically distinct. Within  
15 the derivation cohort, candidate predictors were examined for co-linearity and missing or  
16 extreme values. In the presence of co-linearity, one predictor was dropped from the set of  
17 candidate predictors. Five multiple imputations were used for continuous variables with missing  
18 data. Patients with values of “not recorded” for categorical variables (eg, smoking, need for  
19 supplemental oxygen) were assumed to have the reference value (ie. “no”) for that categorical  
20 variable. The initial logistic regression model considered all candidate predictors, with  
21 continuous predictors fit with restricted cubic splines with three knots. The strengths of  
22 associations between predictors and outcome were assessed using an analysis of variance  
23 (ANOVA) plot to inform the degrees of freedom to allocate to each predictor. The model was fit  
24 again with these changes. A fast step-down procedure reduced the model to key predictors based  
25 on an Akaike's information criterion stopping rule with a threshold of 120 to enable a model with  
26 a relatively small number of predictors that would be clinically easy to use. Internal bootstrap  
27 validation with 1,000 bootstrap samples was conducted to provide an optimism-corrected C-  
28 statistic. Continuous predictors were categorized based on the relationship between the spline  
29 function and outcome.  
30  
31  
32  
33  
34  
35  
36  
37  
38  
39  
40  
41  
42  
43  
44  
45  
46  
47  
48  
49  
50  
51  
52  
53  
54  
55  
56  
57  
58  
59  
60

1  
2  
3 We then developed the points-based CCEDRRN COVID-19 Infection Score (CCIS) using a  
4 nomogram to assign integer point values for each variable included in the derived model.

5  
6  
7 Discrimination of the score was evaluated using the C-statistic. Calibration was evaluated using  
8 calibration curves and comparison of observed and expected outcomes. Diagnostic performance  
9 was evaluated using sensitivity and specificity, predictive values, and likelihood ratios at  
10 different point thresholds.  
11  
12  
13  
14  
15

16  
17 We then evaluated the discrimination, calibration, and performance characteristics of the CCIS  
18 in an external validation cohort of patients from geographically distinct study sites who were not  
19 part of the derivation cohort.  
20  
21  
22  
23

#### 24 25 *Validation of previously published models*

26  
27 We used our combined (derivation and validation) study cohort to externally validate the COvid  
28 Rule out Criteria (CORC) score developed by Kline et al (although we were not able to include  
29 race and ethnicity variables as these are not reliably recorded or reported in most Canadian  
30 hospitals).<sup>3</sup> We compared measures of discrimination and calibration, along with sensitivity and  
31 specificity of risk score values for the CCIS and CORC (with race and ethnicity variables  
32 removed). We split each score into categories of low, moderate, and high-risk for SARS-CoV-2  
33 infection. Low risk was defined as a score having a sensitivity for ruling-out infection of 95% or  
34 higher. High-risk was defined as a score having a specificity for ruling in infection of 95% or  
35 higher. We compared the performance of the two scores by calculating net reclassification  
36 improvement across low, moderate, and high-risk categories.<sup>21,22</sup>  
37  
38  
39  
40  
41  
42  
43  
44  
45  
46  
47  
48  
49

50  
51 All analyses were performed in R<sup>23</sup> using the rms package.<sup>24</sup>  
52

#### 53 54 *Role of the funding sources*

55  
56  
57  
58  
59  
60

1  
2  
3 The funding organizations had no role in the study conduct, data analysis, manuscript  
4 preparation or submission.  
5  
6

### 7 8 *Patient and public involvement* 9

10  
11 The CCEDRRN governance structure includes patient representatives on the Executive  
12 Committee, Scientific Steering Committee, Protocol Review and Publications Committee, Data  
13 Access and Monitoring Committee and Knowledge Translation Committee. The network also  
14 has a Patient Engagement Committee composed of patient partners from across Canada. Patient  
15 partners provided input into study design and selection of outcomes for all CCEDRRN analyses,  
16 and provide advice on knowledge sharing and translation strategies.  
17  
18  
19  
20  
21  
22  
23  
24  
25

### 26 **Results** 27

28 This analysis is based on 27,665 patients consecutively enrolled from 32 participating emergency  
29 departments between March and October, 2020 (Figure 1, Appendix Table 1). Sites and  
30 enrolment periods contributing patient data are shown in the supplementary appendix (Appendix  
31 Table 1). Of the included patients, 1,167 (4.2%) had a positive SARS-CoV-2 NAAT result,  
32 including 1133 who had a positive initial test and 34 who tested positive after a negative (27) or  
33 indeterminate (7) initial NAAT.  
34  
35  
36  
37  
38  
39  
40  
41  
42

43 The study cohort was subdivided into a derivation cohort (21,743 patients from 16 sites, 940  
44 (4.3%) SARS-CoV-2 positive) and a separate external validation cohort (5,922 patients from 16  
45 different sites, 227 (3.8%) SARS-CoV-2 positive). Demographic and clinical characteristics of  
46 the derivation and validation cohorts are shown in Table 1. No continuous variable requiring  
47 multiple imputation had more than 3.4% missingness (Appendix Table 2).  
48  
49  
50  
51  
52  
53  
54  
55  
56  
57  
58  
59  
60



1  
2  
3 In the derivation cohort, we derived a 10-variable model to predict the probability of a patient  
4 having a positive SARS-CoV-2 NAAT. The regression coefficients and odds ratios for each  
5 variable in the model are shown in Table 2. The C-statistic for the derived model was 0.851 with  
6 excellent calibration.  
7  
8  
9

10  
11  
12 We created a points-based CCEDRRN COVID-19 Infection Score (CCIS) using rounded  
13 regression coefficients with a range of negative two to nine points (Table 2). The C-statistic of  
14 the CCIS in the derivation cohort was 0.838 (0.824–0.852) with excellent calibration (Figure 2).  
15  
16 A score of zero or less ruled out a positive SARS-CoV-2 test result in 5,996/21,743 patients  
17 (27.6%) with a sensitivity of 96.6% (95% CI 95.2–97.7). A score of four or more was observed  
18 in 1,338/21,743 patients (6.2%) and had a specificity of 95.6 (95% CI 95.3–95.8) indicating a  
19 low frequency of false positives (Appendix Table 3).  
20  
21  
22  
23  
24  
25  
26  
27  
28  
29

30 We then quantified the performance of the CCIS in our external validation cohort. In this cohort,  
31 the C-statistic for the points-based risk score was 0.792 (Figure 2). A score of zero or less ruled  
32 out a positive SARS-CoV-2 test result in 1,863/5,925 patients (31.4%) with a sensitivity of  
33 94.3% (95% CI 90.4–96.9). A score of four or more was observed in 174/5,925 patients (2.9%)  
34 and had a specificity of 97.8 (95% CI 97.4–98.1) indicating a low frequency of false positives  
35 (Table 3).  
36  
37  
38  
39  
40  
41  
42  
43

44 In a combined cohort of patients (derivation and validation combined), we compared the  
45 discrimination and diagnostic performance of the CCIS to the CORC score. The CCIS had a C-  
46 statistic of 0.837 compared to 0.750 for the CORC score (with race/ethnicity variables removed)  
47 (Appendix Figure 1). A CCIS of zero or less ruled out SARS-CoV-2 infection in 28.4% of  
48 patients with a sensitivity of 96.1% (Appendix Table 4) whereas a CORC score of negative one  
49 or less ruled out SARS-CoV 2 infection in 9.9% of patients with 97.4% (Appendix Table 5)  
50  
51  
52  
53  
54  
55  
56  
57  
58  
59  
60

1  
2  
3 sensitivity. Compared to the CORC score (with race/ethnicity variables removed), the CCIS  
4  
5 showed substantial net reclassification improvement (NRI=0.310, Appendix Table 6).  
6  
7

## 8 **Discussion**

9  
10 We have derived and validated a simple clinical risk score, the CCEDRRN COVID-19 Infection  
11  
12 Score (CCIS), to predict the probability of a positive SARS-CoV-2 NAAT in patients presenting  
13  
14 to emergency departments. It utilizes only clinical variables available at the patient's bedside,  
15  
16 along with a common publicly available measure of community COVID-19 incidence. In this  
17  
18 study population, the score ruled out SARS-CoV-2 infection with 96.1% sensitivity in almost  
19  
20 one-third of patients. It also identified patients at high risk of infection with over 95% specificity.  
21  
22  
23

24  
25 In addition to clinical variables, we also included the average daily incidence of SARS-CoV-2  
26  
27 infections in a patient's health region, which is an essential predictor of the probability of a  
28  
29 patient's risk of COVID infection. Although access to timely incidence data may be challenging  
30  
31 in under-resourced health systems, this information is publicly reported in many health  
32  
33 jurisdictions. In practice, the local incidence would likely need to be shared within an emergency  
34  
35 department on a daily basis. We developed data driven cutoffs for categorization of low,  
36  
37 moderate and high incidence for calculation the CCIS. Thus, the clinician would only need to  
38  
39 know whether local incidence is high, moderate or low to use this score, and the incidence  
40  
41 category changes slowly over time. Patients who live and work in separate health regions could  
42  
43 be assigned the higher incidence value at hospital presentation for a conservative risk estimate.  
44  
45 Patients in areas with high disease burden will automatically score two points, meaning that few  
46  
47 patients in these settings will be classified as low risk. Therefore, symptomatic patients would all  
48  
49 warrant testing. This underscores the need for liberal isolation and testing practices in settings  
50  
51 with high rates of community SARS-CoV-2 transmission.  
52  
53  
54  
55  
56  
57  
58  
59  
60

1  
2  
3 The CCIS has several important clinical applications. The ability to differentiate patients with  
4 high or low probability of COVID-19 disease could guide safe and effective patient isolation or  
5 cohorting from the time of hospital arrival, prior to the availability of SARS-CoV-2 test results.  
6  
7 Identification of patients with extremely low risk of SARS-CoV-2 infection may even allow safe  
8 omission of testing, which will minimize testing resource utilization in settings with limited  
9  
10 testing capacity. Identifying patients with a high probability of SARS-CoV-2 infection can help  
11  
12 prioritize use of rapid antigen testing and initiation of effective empiric therapy in critically ill  
13  
14 patients prior to availability of NAAT results. By presenting risk estimates and sensitivity for all  
15  
16 risk score values, we allow end-users to choose cut-offs for ruling-in and ruling-out SARS-CoV-  
17  
18 2 infection that make sense for their setting and application.  
19  
20  
21  
22  
23  
24  
25

26  
27 Several other risk prediction instruments have been developed to predict positive COVID-19 test  
28  
29 results in undifferentiated patients. These tools were developed in studies with substantial  
30  
31 methodological limitations and incorporate variables not immediately available at the time of a  
32  
33 patient's hospital arrival, so are not useful to guide early isolation, testing and treatment  
34  
35 decisions.<sup>2</sup> None of these risk prediction tools considered the prevalence of disease in the  
36  
37 population. Prevalence can substantially change the approach to testing and cohorting, and this  
38  
39 will become increasingly important as prevalence rates drop and selective rather than liberal  
40  
41 testing may be more appropriate.  
42  
43  
44  
45

46 United States-based investigators recently reported the development<sup>3</sup> and validation<sup>25</sup> of the  
47  
48 CORC score using only clinical variables. The CORC score contains several similar variables to  
49  
50 the CCIS. The CORC score included race and ethnicity as predictor variables, which may limit  
51  
52 the generalizability of the CORC score beyond the urban American population in which it was  
53  
54 developed, as it does not reflect the international diversity of ethnic backgrounds. Moreover, it is  
55  
56  
57  
58  
59  
60

1  
2  
3 unlikely race or ethnicity represents a biologic risk. The association between race and ethnicity  
4 and SARS-CoV-2 infection in the CORC score likely reflects other sociodemographic and  
5  
6 geographic predictors of the risk of COVID-19 infection in the American population.<sup>25</sup> The  
7  
8 CCIS uses the seven-day average local incidence as an estimate of population risk. We believe  
9  
10 this approach is more generalizable across populations and better reflects individual patients'  
11  
12 pre-test probability of SARS-CoV-2 infection.<sup>26</sup>  
13  
14  
15

### 16 17 *Strengths and Limitations*

18  
19  
20 The cohorts used to derive and validate the rule included comprehensive data on consecutive  
21  
22 eligible patients from a large, geographically distributed network of Canadian urban, regional,  
23  
24 and rural emergency departments. Strict data quality protocols and data cleaning protocols  
25  
26 ensured the reliability of collected data. This score may be employed at the time of a patient's  
27  
28 arrival to hospital, does not require the use of additional laboratory testing or imaging, nor the  
29  
30 use of electronic calculators or electronic medical records for implementation.  
31  
32  
33

34  
35 Some missing data required either multiple imputation or classification of missing categorical  
36  
37 variables as being absent. The overall missingness of data in this registry is very low.<sup>15</sup>  
38

39  
40 Although the data collection for the CCEDRRN registry relies on abstraction from health  
41  
42 records, this approach has been shown to be reliable in our study sites when compared to  
43  
44 prospective data collection.<sup>15</sup>  
45

46  
47 The clinical variables in the model are not likely to be sensitive to changes in geographical  
48  
49 changes in SARS-CoV-2 epidemiology. The variable of travel from a country with high  
50  
51 incidence may become less informative as the pandemic has spread globally and "hot spots"  
52  
53  
54  
55  
56  
57  
58  
59  
60

1  
2  
3 change. However, high-prevalence areas may change over time, meaning that the risk factor of  
4 travel from a region with a high prevalence is likely to still be informative.  
5  
6

7  
8 This risk score was developed using data from patients enrolled in the first nine months of the  
9 pandemic when rates of influenza were low. As such, the score may need to be re-validated and  
10 refined in the future to reflect the influence of influenza, the emergence of variant strains of  
11 SARS-CoV-2, and widespread population immunization on patients' risk of infection.  
12  
13  
14  
15  
16

### 17 18 *Conclusion* 19

20  
21 We derived and successfully validated the CCEDRRN COVID-19 Infection Score to accurately  
22 predict the probability of SARS-CoV-2 nucleic acid test results in patients presenting to  
23 emergency departments. The CCIS uses clinical variables, accounts for the incidence of SARS-  
24 CoV-2 in the community and is ready for immediate clinical use. This score has potential utility  
25 to guide early decisions around SARS-CoV-2 test utilization, patient isolation, and empiric  
26 therapy for patients solely based on clinical assessment.  
27  
28  
29  
30  
31  
32  
33  
34  
35  
36  
37  
38  
39  
40  
41  
42  
43  
44  
45  
46  
47  
48  
49  
50  
51  
52  
53  
54  
55  
56  
57  
58  
59  
60

### *Contributors*

CMH, ADM, LJM, RJR, and JJP conceived the study, with input on the design and selection of variables from the other contributors. CMH, LJM, PA, SCB, PD and EL obtained funding on behalf of the CCEDRRN investigators. CMH, ADM, PA, SCB, IC, PD, JH, BHR, RO, MW, and KY facilitated data collection along with other members of the CCEDRRN and can verify the underlying data. RJR and JJP developed the analytic plan. SV performed the analysis, with assistance from GG and RJR, including accessing and verification of underlying data. All contributors provided input on interpretation of findings. ADM, CMH, and RJR drafted the manuscript with additional input from all contributors.

### *Acknowledgment*

We gratefully acknowledge the assistance of Ms. Amber Cragg in the preparation of this manuscript. We thank the UBC clinical coordinating centre staff, the UBC legal, ethics, privacy and contract staff and the research staff at each of the participating institutions in the network outlined in the attached Supplement. The network would not exist today without the dedication of these professionals.

Thank you to all our patient partners who shared their lived experiences and perspectives to ensure that the knowledge we co-create addresses the concerns of patients and the public. Creating the largest network of collaboration across Canadian Emergency Departments would not have been feasible without the tireless efforts of Emergency Department Chiefs, and research coordinators and research assistants at participating sites. Finally, our most humble and sincere gratitude to all our colleagues in medicine, nursing, and the allied health professions who have been on the front lines of this pandemic from day one staffing our ambulances, Emergency

1  
2  
3 Departments, ICUs, and hospitals bravely facing the risks of COVID-19 to look after our fellow  
4 citizens and after one another. We dedicate this network to you. (Supplementary Table)  
5  
6

#### 7 8 *Data Availability Statement* 9

10  
11 For investigators who wish to access Canadian COVID-19 Emergency Rapid Response Network  
12 data, proposals may be submitted to the network for review and approval by the network's peer-  
13 review publication committee, the data access and management committee and the executive  
14 committee, as per the network's governance. Information regarding submitting proposals and  
15 accessing data may be found at <https://canadiancovid19ednetwork.org/>.  
16  
17  
18  
19  
20  
21  
22

#### 23 24 *Funding Acknowledgement* 25

26 The Canadian Institutes of Health Research (447679), Ontario Ministry of Colleges and  
27 Universities (C-655-2129), Saskatchewan Health Research Foundation (5357), Genome BC  
28 (COV024 and VAC007) Fondation du CHU de Québec (Octroi No. 4007). Sero-Surveillance  
29 and Research (COVID-19 Immunity Task Force Initiative) provided peer-reviewed funding. The  
30 BC Academic Health Science Network and BioTalent Canada provided non-peer reviewed  
31 funding. These organizations are not-for-profit, and had no role in study conduct, analysis, or  
32 manuscript preparation.  
33  
34  
35  
36  
37  
38  
39  
40  
41  
42

#### 43 44 *Competing interests* 45

46 ADM, CMH, RR, PA, SCB, IC, PD, JH, EL, RO, BHR, MW, KY, LJM, JP are co-investigators  
47 on the funding sources listed above, and have no additional competing interests. GG and SV  
48 have no competing interests.  
49  
50  
51  
52

#### 53 54 *Ethics Approval* 55 56 57 58 59 60

1  
2  
3  
4  
5  
6  
7  
8  
9  
10  
11  
12  
13  
14  
15  
16  
17  
18  
19  
20  
21  
22  
23  
24  
25  
26  
27  
28  
29  
30  
31  
32  
33  
34  
35  
36  
37  
38  
39  
40  
41  
42  
43  
44  
45  
46  
47  
48  
49  
50  
51  
52  
53  
54  
55  
56  
57  
58  
59  
60

The CCEDRRN network protocol was approved with a waiver of informed consent by the University of British Columbia Research Ethics Board (UBC REB H20-01015), and subsequently by the research ethics boards of all participating institutions.

For peer review only



## References

- 1 Update to living systematic review on prediction models for diagnosis and prognosis of covid-19. *BMJ* 2021; **372**: n236.
- 2 Wynants L, Van Calster B, Collins GS, *et al*. Prediction models for diagnosis and prognosis of covid-19 infection: systematic review and critical appraisal. *BMJ* 2020; **369**: m1328.
- 3 Kline JA, Camargo CA, Courtney DM, *et al*. Clinical prediction rule for SARS-CoV-2 infection from 116 U.S. emergency departments 2-22-2021. *PloS One* 2021; **16**: e0248438.
- 4 McDonald SA, Medford RJ, Basit MA, Diercks DB, Courtney DM. Derivation With Internal Validation of a Multivariable Predictive Model to Predict COVID-19 Test Results in Emergency Department Patients. *Acad Emerg Med Off J Soc Acad Emerg Med* 2021; **28**: 206–14.
- 5 Kurstjens S, van der Horst A, Herpers R, *et al*. Rapid identification of SARS-CoV-2-infected patients at the emergency department using routine testing. *Clin Chem Lab Med* 2020; **58**: 1587–93.
- 6 Lippi G, Henry BM, Hoehn J, Benoit S, Benoit J. Validation of the Corona-Score for rapid identification of SARS-CoV-2 infections in patients seeking emergency department care in the United States. *Clin Chem Lab Med* 2020; **58**: e311–3.
- 7 Sung J, Choudry N, Bachour R. Development and validation of a simple risk score for diagnosing COVID-19 in the emergency room. *Epidemiol Infect* 2020; **148**: e273.
- 8 Schwab P, Schütte AD, Dietz B, Bauer S. Clinical Predictive Models for COVID-19: Systematic Study. *J Med Internet Res* 2020; **22**: e21439.
- 9 Plante TB, Blau AM, Berg AN, *et al*. Development and External Validation of a Machine Learning Tool to Rule Out COVID-19 Among Adults in the Emergency Department Using Routine Blood Tests: A Large, Multicenter, Real-World Study. *J Med Internet Res* 2020; **22**: e24048.
- 10 Soltan AAS, Kouchaki S, Zhu T, *et al*. Rapid triage for COVID-19 using routine clinical data for patients attending hospital: development and prospective validation of an artificial intelligence screening test. *Lancet Digit Health* 2021; **3**: e78–87.
- 11 Cabitza F, Campagner A, Ferrari D, *et al*. Development, evaluation, and validation of machine learning models for COVID-19 detection based on routine blood tests. *Clin Chem Lab Med* 2020; **59**: 421–31.
- 12 Jehi L, Ji X, Milinovich A, *et al*. Individualizing Risk Prediction for Positive Coronavirus Disease 2019 Testing: Results From 11,672 Patients. *Chest* 2020; **158**: 1364–75.

- 1  
2  
3 13 Joshi RP, Pejaver V, Hammarlund NE, *et al.* A predictive tool for identification of SARS-  
4 CoV-2 PCR-negative emergency department patients using routine test results. *J Clin Virol*  
5 2020; **129**: 104502.  
6  
7  
8 14 Formica V, Minieri M, Bernardini S, *et al.* Complete blood count might help to identify  
9 subjects with high probability of testing positive to SARS-CoV-2. *Clin Med Lond Engl* 2020;  
10 **20**: e114–9.  
11  
12 15 Hohl CM, Rosychuk RJ, McRae AD, *et al.* Development of the Canadian COVID-19  
13 Emergency Department Rapid Response Network population-based registry: a methodology  
14 study. *CMAJ Open* 2021; **9**: E261–70.  
15  
16 16 Moons KGM, Altman DG, Reitsma JB, *et al.* Transparent Reporting of a multivariable  
17 prediction model for Individual Prognosis or Diagnosis (TRIPOD): explanation and  
18 elaboration. *Ann Intern Med* 2015; **162**: W1-73.  
19  
20  
21 17 W.H. Organization. Clinical Characterisation Protocol (CCP), Version 3.1/3.2. Oxford  
22 University.  
23  
24 18 ISARIC/WHO Clinical Characterisation Protocol for Severe Emerging Infections [COVID-  
25 19] [UPH]. Health Res. Auth. /planning-and-improving-research/application-  
26 summaries/research-summaries/isaricwho-clinical-characterisation-protocol-for-severe-  
27 emerging-infections/ (accessed June 4, 2021).  
28  
29  
30 19 Health Regional Archive (Public View). [https://resources-](https://resources-covid19canada.hub.arcgis.com/datasets/3aa9f7b1428642998fa399c57dad8045/data?layer=1)  
31 [covid19canada.hub.arcgis.com/datasets/3aa9f7b1428642998fa399c57dad8045/data?layer=1](https://resources-covid19canada.hub.arcgis.com/datasets/3aa9f7b1428642998fa399c57dad8045/data?layer=1)  
32 (accessed June 4, 2021).  
33  
34  
35 20 Steyerberg EW. Clinical Prediction Rules. 2019: 55.  
36  
37 21 Leening MJG, Vedder MM, Witteman JCM, Pencina MJ, Steyerberg EW. Net reclassification  
38 improvement: computation, interpretation, and controversies: a literature review and  
39 clinician's guide. *Ann Intern Med* 2014; **160**: 122–31.  
40  
41 22 Kerr KF, Wang Z, Janes H, McClelland RL, Psaty BM, Pepe MS. Net reclassification indices  
42 for evaluating risk prediction instruments: a critical review. *Epidemiol Camb Mass* 2014; **25**:  
43 114–21.  
44  
45 23 R Core Team. R: A language and environment for statistical computing. Vienna, Austria: R  
46 Foundation for Statistical Computing, 2020 <https://www.R-project.org/>.  
47  
48 24 Harrell, FE Jr. rms: Regression Modeling Strategies., Version 6.2-0. 2021 [https://cran.r-](https://cran.r-project.org/web/packages/rms/index.html)  
49 [project.org/web/packages/rms/index.html](https://cran.r-project.org/web/packages/rms/index.html).  
50  
51  
52 25 Nevel AE, Kline JA. Inter-rater reliability and prospective validation of a clinical prediction  
53 rule for SARS-CoV-2 infection. *Acad Emerg Med*. 2021 Jun 16. doi: 10.1111/acem.14309.  
54 Epub ahead of print. PMID: 34133794.  
55  
56  
57  
58  
59  
60

1  
2  
3 26 Vyas DA, Eisenstein LG, Jones DS. Hidden in Plain Sight — Reconsidering the Use of Race  
4 Correction in Clinical Algorithms. *N Engl J Med* 2020; **383**: 874–82  
5  
6  
7  
8  
9  
10  
11  
12  
13  
14  
15  
16  
17  
18  
19  
20  
21  
22  
23  
24  
25  
26  
27  
28  
29  
30  
31  
32  
33  
34  
35  
36  
37  
38  
39  
40  
41  
42  
43  
44  
45  
46  
47  
48  
49  
50  
51  
52  
53  
54  
55  
56  
57  
58  
59  
60

For peer review only

1  
2  
3  
4  
5  
6  
7  
8  
9  
10  
11  
12  
13  
14  
15  
16  
17  
18  
19  
20  
21  
22  
23  
24  
25  
26  
27  
28  
29  
30  
31  
32  
33  
34  
35  
36  
37  
38  
39  
40  
41  
42  
43  
44  
45  
46  
47  
48  
49  
50  
51  
52  
53  
54  
55  
56  
57  
58  
59  
60

**Tables & Figures**

**Figure 1. Flow Diagram of Patients through the study (based on PRPC template)**

ED=emergency department; COVID=coronavirus disease

For peer review only

**Figure 2. Distribution and performance of the CCEDRRN COVID Infection Score in the derivation cohort (left panel) and validation cohorts (right panel): A) distribution of the score, B) observed in-hospital mortality across the range of the score, C) predicted versus observed probability of in-hospital mortality, and D) receiver operating characteristic curve with area under the curve (AUC) and associated 95% confidence interval.**

A)

B)

C)

D)

For peer review only

AUC 0.84 (0.82-0.85)

AUC 0.79 (0.76-0.82)

**Table 1.** Characteristics and selected outcomes of enrolled patients

|                                                                                  | <b>Derivation<br/>(n=21743)</b> | <b>Validation<br/>(n=5922)</b> |
|----------------------------------------------------------------------------------|---------------------------------|--------------------------------|
| <b>Age in years, median (IQR)</b>                                                | 57 (38, 73)                     | 56 (37, 73)                    |
| <b>Female (%)</b>                                                                | 10992 (50.5)                    | 3085 (52.1)                    |
| <b>Arrival From, n (%)</b>                                                       |                                 |                                |
| Home                                                                             | 19879 (91.4)                    | 5429 (91.7)                    |
| Long-term care/Rehabilitation facility/Corrections facility                      | 1000 (4.6)                      | 262 (4.4)                      |
| No fixed address/ Shelter/ Single room occupancy                                 | 574 (2.6)                       | 201 (3.4)                      |
| Inter-hospital transfer                                                          | 290 (1.3)                       | 30 (0.5)                       |
| <b>Risk for Infection, n (%)</b>                                                 |                                 |                                |
| Healthcare worker                                                                | 505 (2.3)                       | 567 (9.6)                      |
| Household/caregiver contact                                                      | 566 (2.6)                       | 161 (2.7)                      |
| Institutional exposure (e.g., LTC, prison)                                       | 1354 (6.2)                      | 213 (3.6)                      |
| Microbiology lab                                                                 | 4 (0.0)                         | 8 (0.1)                        |
| Travel                                                                           | 924 (4.2)                       | 344 (5.8)                      |
| Other                                                                            | 1320 (6.1)                      | 449 (7.6)                      |
| Unknown                                                                          | 5415 (24.9)                     | 1856 (31.3)                    |
| No documented risk for infection                                                 | 10028 (46.1)                    | 1075 (18.1)                    |
| <b>Arrival Vital Signs, median (IQR)</b>                                         |                                 |                                |
| Body temperature                                                                 | 36.7 (36.3, 37.1)               | 36.8 (36.5, 37.1)              |
| Heart rate                                                                       | 91 (79, 107)                    | 90 (78, 105)                   |
| Oxygen saturation                                                                | 97 (95, 98)                     | 97 (95, 99)                    |
| Respiratory rate                                                                 | 18 (18, 20)                     | 18 (16, 20)                    |
| Systolic blood pressure                                                          | 133 (118, 150)                  | 136 (120, 149)                 |
| <b>Common Comorbid Conditions, n (%)</b>                                         |                                 |                                |
| Active malignant neoplasm (cancer)                                               | 1678 (7.7)                      | 333 (5.6)                      |
| Asthma                                                                           | 1699 (7.8)                      | 468 (7.9)                      |
| Atrial fibrillation                                                              | 1598 (7.3)                      | 402 (6.8)                      |
| Chronic kidney disease                                                           | 1214 (5.6)                      | 321 (5.4)                      |
| Chronic lung disease (not asthma/pulmonary fibrosis)                             | 1729 (8)                        | 583 (9.8)                      |
| Chronic neurological disorder (not dementia; e.g., stroke/TIA, seizure disorder) | 1310 (6)                        | 400 (6.8)                      |
| Congestive heart failure                                                         | 1450 (6.7)                      | 368 (6.2)                      |
| Coronary artery disease                                                          | 1591 (7.3)                      | 449 (7.6)                      |
| Dementia                                                                         | 734 (3.4)                       | 188 (3.2)                      |
| Diabetes                                                                         | 2583 (11.9)                     | 916 (15.5)                     |
| Dialysis                                                                         | 198 (0.9)                       | 28 (0.5)                       |
| Dyslipidemia                                                                     | 2375 (10.9)                     | 543 (9.2)                      |
| Hypertension                                                                     | 6320 (29.1)                     | 1697 (28.6)                    |
| Hypothyroidism                                                                   | 1344 (6.2)                      | 397 (6.7)                      |

|                                               |              |             |
|-----------------------------------------------|--------------|-------------|
| Mild liver disease                            | 280 (1·3)    | 90 (1·5)    |
| Moderate/severe liver disease                 | 245 (1·1)    | 88 (1·5)    |
| Obesity (clinical impression)                 | 284 (1·3)    | 108 (1·8)   |
| Organ transplant                              | 128 (0·6)    | 19 (0·3)    |
| Rheumatologic disorder                        | 1122 (5·2)   | 258 (4·4)   |
| Other                                         | 10075 (46·3) | 2174 (36·7) |
| Past malignant neoplasm (cancer)              | 936 (4·3)    | 256 (4·3)   |
| Psychiatric condition/Mental health diagnosis | 2967 (13·6)  | 831 (14)    |
| Pulmonary fibrosis                            | 80 (0·4)     | 26 (0·4)    |
| <b>Symptoms Reported, n(%)</b>                |              |             |
| Abdominal pain                                | 2725 (12·5)  | 540 (9·1)   |
| Altered consciousness/confusion               | 1456 (6·7)   | 322 (5·4)   |
| Bleeding (hemorrhage)                         | 330 (1·5)    | 22 (0·4)    |
| Chest pain (includes discomfort or tightness) | 4242 (19·5)  | 974 (16·4)  |
| Chills                                        | 2045 (9·4)   | 594 (10)    |
| Conjunctivitis                                | 49 (0·2)     | 26 (0·4)    |
| Cough                                         | 7724 (35·5)  | 2663 (44·9) |
| Diarrhea                                      | 2140 (9·8)   | 526 (8·9)   |
| Dizziness/Vertigo                             | 1521 (7)     | 300 (5·1)   |
| Dysgeusia/anosmia                             | 140 (0·6)    | 33 (0·6)    |
| Ear pain                                      | 144 (0·7)    | 30 (0·5)    |
| Fatigue/malaise                               | 3361 (15·5)  | 924 (15·6)  |
| Fever                                         | 5055 (23·2)  | 1580 (26·7) |
| Headache                                      | 2144 (9·9)   | 624 (10·5)  |
| Hemoptysis (bloody sputum)                    | 298 (1·4)    | 66 (1·1)    |
| Joint pain (arthralgia)                       | 296 (1·4)    | 82 (1·4)    |
| Lower chest wall indrawing                    | 10 (0)       | 7 (0·1)     |
| Lymphadenopathy                               | 67 (0·3)     | 21 (0·4)    |
| Muscle aches (myalgia)                        | 1575 (7·2)   | 517 (8·7)   |
| Nausea/vomiting                               | 4219 (19·4)  | 935 (15·8)  |
| No recorded symptoms                          | 2113 (9·7)   | 431 (7·3)   |
| Runny nose (rhinorrhea)                       | 1061 (4·9)   | 501 (8·5)   |
| Seizures                                      | 205 (0·9)    | 42 (0·7)    |
| Shortness of breath (dyspnea)                 | 8537 (39·3)  | 2383 (40·2) |
| Skin rash                                     | 241 (1·1)    | 38 (0·6)    |
| Skin ulcers                                   | 27 (0·1)     | <5          |
| Sore throat                                   | 3024 (13·9)  | 985 (16·6)  |
| Sputum production                             | 1507 (6·9)   | 401 (6·8)   |
| Wheezing                                      | 582 (2·7)    | 130 (2·2)   |
| <b>Tobacco Use, n (%)</b>                     | 1852 (8·5)   | 616 (10·4)  |
| <b>Illicit Substance Use, n (%)</b>           | 1219 (5·6)   | 353 (6·0)   |

|                                                            |                |                 |
|------------------------------------------------------------|----------------|-----------------|
| <b>Oxygen Required in ED, n (%)</b>                        | 1919 (8·8)     | 627 (10·6)      |
| <b>Hospital Admission, n (%)</b>                           | 9913 (45·6)    | 2446 (41·3)     |
| <b>In-hospital Death, n (%)</b>                            | 753 (3·5)      | 213 (3·6)       |
| <b>7-day average incident COVID-19 cases, median (IQR)</b> | 1·3 (0·7, 3·2) | 0·96 (0·5, 1·3) |
| <b>SARS-CoV-2 Positive, n (%)</b>                          | 940 (4·3)      | 227 (3·8)       |

IQR=interquartile range; LTC=long-term care; TIA= transient ischemic attack; ED=emergency department

For peer review only



**Table 2.** Adjusted associations between model predictor variables and SARS-CoV-2 nucleic acid test results

| Variable/Score Component                                                                                | Regression Coefficient (SE) | Adjusted Odds Ratio (95% CI) | Score Value |
|---------------------------------------------------------------------------------------------------------|-----------------------------|------------------------------|-------------|
| <b>7-day average incident COVID-19 cases</b>                                                            |                             |                              |             |
| 0 – 2 daily cases per 100,000 population                                                                | -                           | -                            | 0           |
| 2 to 7.99 daily cases per 100,000 population                                                            | 1.22 (0.09)                 | 3.38 (2.85–4.00)             | 1           |
| ≥8 daily cases per 100,000 population                                                                   | 2.21 (0.10)                 | 9.09 (7.53–10.97)            | 2           |
| <b>Institutional exposure (e.g. LTC, prison) or Travel from country with known cases within 14 days</b> | 0.88 (0.09)                 | 2.40 (2.01–2.87)             | 1           |
| <b>Healthcare worker/Microbiology lab</b>                                                               | 1.10 (0.16)                 | 3.02 (2.22–4.10)             | 1           |
| <b>Household/caregiver contact</b>                                                                      | 1.83 (0.12)                 | 6.25 (4.92–7.93)             | 2           |
| <b>Temperature</b>                                                                                      |                             |                              |             |
| <36 and no self-reported fever                                                                          | -0.75 (0.3)                 | 0.47 (0.28–0.80)             | -1          |
| 36 – 37.4 and no self-reported fever                                                                    | -                           | -                            | 0           |
| ≥37.5 or self-reported fever                                                                            | 1.21 (0.08)                 | 3.36 (2.88–3.91)             | 1           |
| <b>Supplemental oxygen delivered in the ED</b>                                                          | 0.98 (0.1)                  | 2.66 (2.18–3.24)             | 1           |
| <b>Cough</b>                                                                                            | 0.85 (0.08)                 | 2.33 (2.01–2.71)             | 1           |
| <b>Dysgeusia/Anosmia</b>                                                                                | 2.03 (0.24)                 | 7.60 (4.76–12.15)            | 2           |
| <b>Muscle aches (Myalgia)</b>                                                                           | 0.7 (0.11)                  | 2.02 (1.64–2.48)             | 1           |
| <b>Current tobacco user</b>                                                                             | -1.13 (0.21)                | 0.32 (0.21–0.49)             | -1          |

LTC: Long-term care; ED: Emergency Department

**Table 3.** Performance metrics for the CCEDRRN COVID-19 Infection Score for ruling in or ruling out SARS-CoV-2 infection at different score cut-off values in the validation cohort

| Score cutoff     | n (%)       | Sensitivity (%; 95% CI) | Specificity (%; 95% CI) | LR+  | LR- | COVID+ n (%) |
|------------------|-------------|-------------------------|-------------------------|------|-----|--------------|
| <b>Rule out:</b> |             |                         |                         |      |     |              |
| ≤-2              | 17 (0.3)    | 100 (98.4–100)          | 0.3 (0.2–0.5)           | 1    | NA  | 0 (0)        |
| ≤-1              | 310 (5.2)   | 99.6 (97.6–100)         | 5.4 (4.9–6.1)           | 1.1  | 0.1 | 1 (0.3)      |
| ≤0               | 1863 (31.5) | 94.3 (90.4–96.9)        | 32.5 (31.3–33.7)        | 1.4  | 0.2 | 13 (0.7)     |
| ≤1               | 3806 (64.3) | 78.9 (73.0–84.0)        | 66.0 (64.7–67.2)        | 2.3  | 0.3 | 48 (1.3)     |
| ≤2               | 5152 (87.0) | 52.9 (46.2–60.0)        | 88.6 (87.7–89.4)        | 4.6  | 0.5 | 107 (2.1)    |
| ≤3               | 5748 (97.1) | 20.7 (15.6–26.6)        | 97.8 (97.4–98.1)        | 9.3  | 0.8 | 180 (3.1)    |
| <b>Rule in:</b>  |             |                         |                         |      |     |              |
| ≥3               | 770 (13.0)  | 52.9 (46.2–59.5)        | 88.6 (87.7–89.4)        | 4.6  | 0.5 | 120 (15.6)   |
| ≥4               | 174 (2.9)   | 20.7 (15.6–26.6)        | 97.8 (97.4–98.1)        | 9.3  | 0.8 | 47 (27.0)    |
| ≥5               | 44 (0.7)    | 7.9 (4.8–12.2)          | 99.5 (99.3–99.7)        | 17.4 | 0.9 | 18 (40.9)    |
| ≥6               | 6 (0.1)     | 0.9 (0.1–3.2)           | 99.9 (99.8–100)         | 12.5 | 1   | 2 (33.3)     |
| ≥7               | 1 (<0.1)    | 0 (0–1.6)               | 100.0 (99.9–100)        | NA   | 1   | 0 (0)        |

LR+: Positive Likelihood Ratio; LR-: Negative Likelihood Ratio

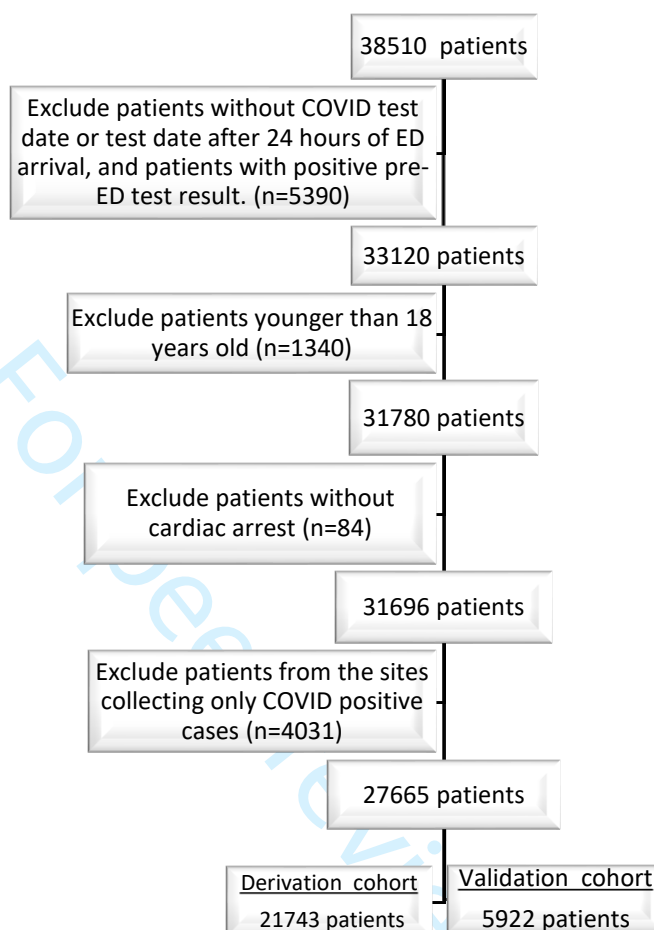

**Figure 2. Distribution and performance of the CCEDRRN COVID Infection Score in the derivation cohort (left panel) and validation cohorts (right panel): A) distribution of the score, B) observed in-hospital mortality across the range of the score, C) predicted versus observed probability of in-hospital mortality, and D) receiver operating characteristic curve with area under the curve (AUC) and associated 95% confidence interval.**

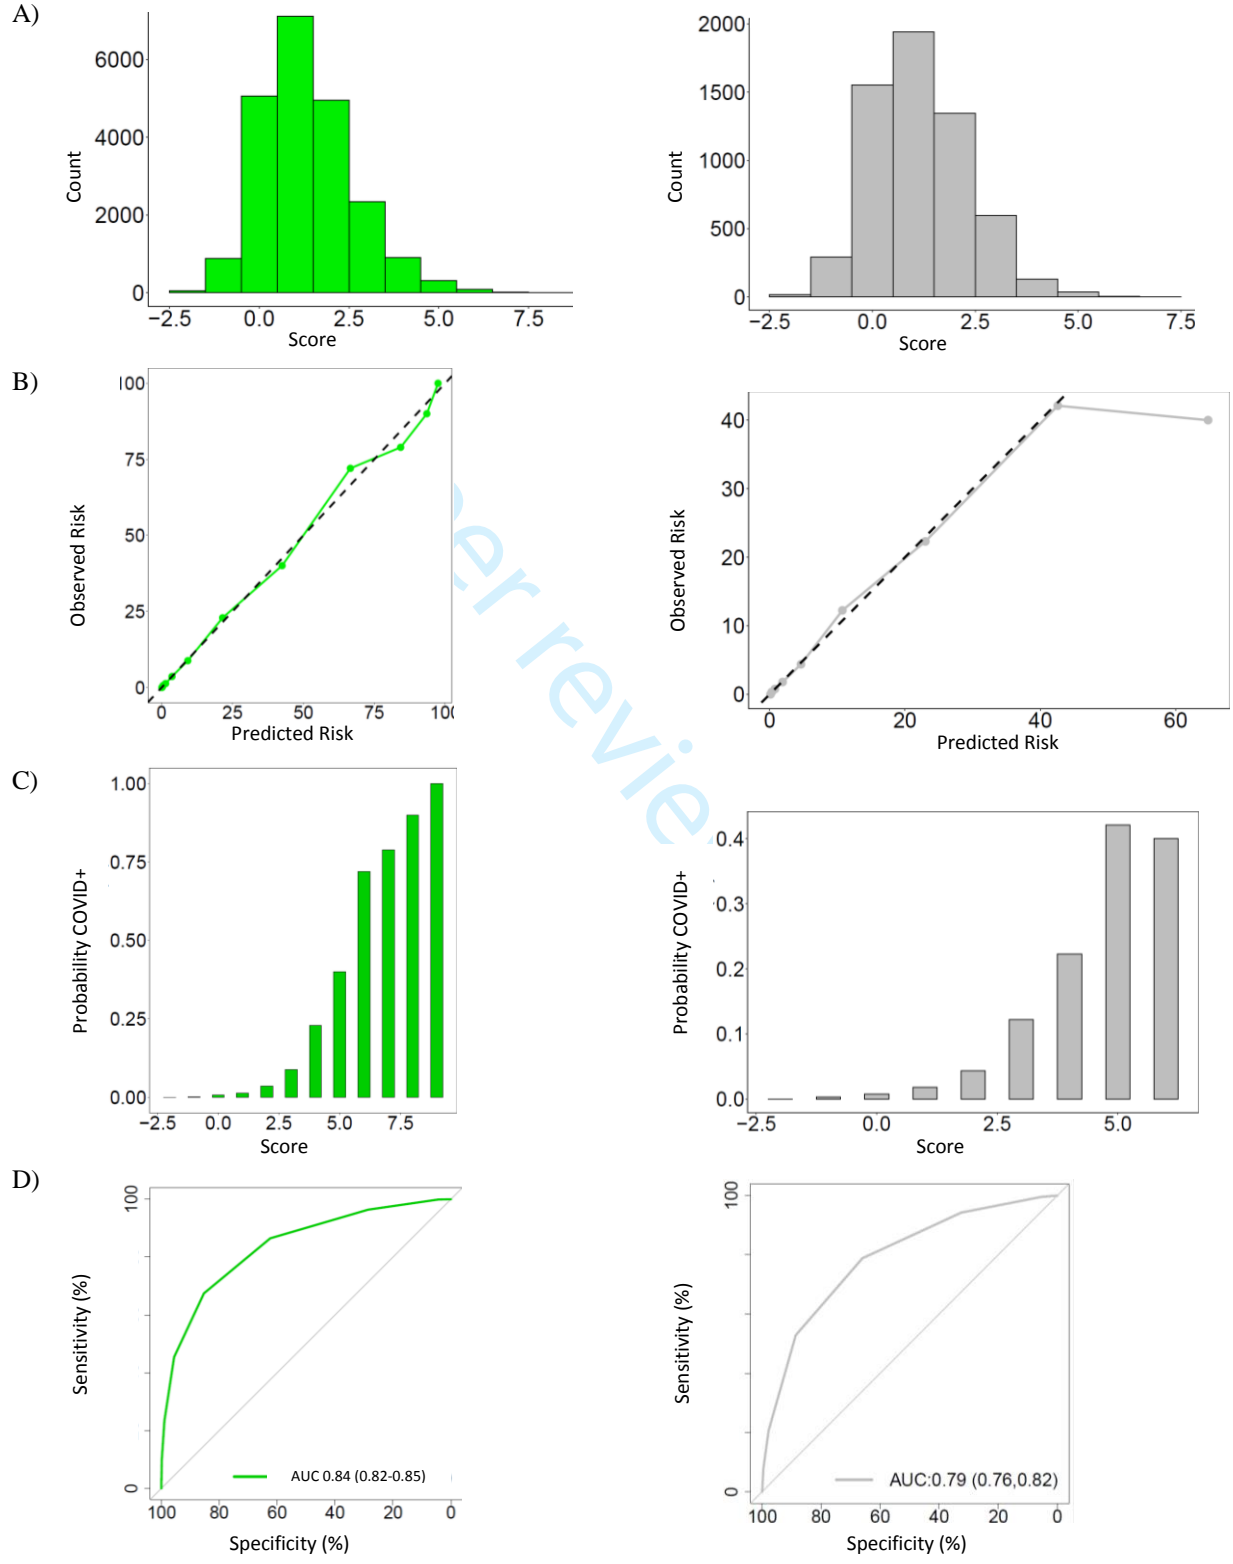

## Appendices

**Appendix Table 1.** Patients enrolled by CCEDRRN site and time periods for data collection

| Site (N patients contributed)                    | Mar 2020    | Apr 2020    | May 2020    | Jun 2020    | Jul 2020    | Aug 2020    | Sept 2020   | Oct 2020   | Total        |
|--------------------------------------------------|-------------|-------------|-------------|-------------|-------------|-------------|-------------|------------|--------------|
| <b>Derivation Cohort</b>                         | <b>3217</b> | <b>4797</b> | <b>5493</b> | <b>3096</b> | <b>2232</b> | <b>1276</b> | <b>1266</b> | <b>366</b> | <b>21743</b> |
| Abbotsford Regional Hospital                     |             | 228         | 474         | 385         | 198         |             |             |            | 1285         |
| Eagle Ridge Hospital                             | 196         | 163         |             |             |             |             |             |            | 359          |
| Foothills, Calgary                               | 437         | 131         |             |             |             |             |             |            | 568          |
| Halifax Infirmiry/Dalhousie, Nova Scotia         | 17          |             |             |             |             |             |             |            | 17           |
| Hants Community Hospital, Nova Scotia            | 1           |             |             |             |             |             |             |            | 1            |
| Hôpital du Sacré-Coeur de Montreal               | 27          | 96          | 401         |             |             |             |             |            | 524          |
| Hôtel-Dieu de Lévis                              | 1           | 19          | 246         |             |             |             |             |            | 266          |
| Jewish General Hospital                          | 754         | 959         | 93          |             |             |             |             |            | 1806         |
| Peter Lougheed Centre                            | 321         | 1119        | 1169        | 605         | 638         | 552         | 616         | 215        | 5235         |
| Royal Columbian Hospital                         | 236         | 408         | 366         |             |             |             |             |            | 1010         |
| Royal University, Saskatoon                      | 132         | 275         | 357         | 296         | 340         | 265         | 193         |            | 1858         |
| Saint John Regional Hospital, New Brunswick      | 98          | 102         |             |             |             |             |             |            | 200          |
| South Campus, Calgary                            | 367         | 598         | 612         | 526         | 586         | 459         | 457         | 151        | 3756         |
| Sunnybrook Health Sciences Centre                |             |             | 473         | 593         | 470         |             |             |            | 1536         |
| The Ottawa Hospital - Civic Campus               | 58          | 24          | 537         |             |             |             |             |            | 619          |
| Vancouver General Hospital                       | 572         | 675         | 765         | 691         |             |             |             |            | 2703         |
| <b>Validation Cohort</b>                         | <b>2082</b> | <b>2012</b> | <b>695</b>  | <b>381</b>  | <b>330</b>  |             | <b>422</b>  |            | <b>5922</b>  |
| Cobequid Community Health Centre                 | 6           |             |             |             |             |             |             |            | 6            |
| Dartmouth General College, Dartmouth Nova Scotia | 7           |             |             |             |             |             |             |            | 7            |
| Health Science North, Sudbury Ontario            |             |             | 295         | 381         | 330         |             |             |            | 1006         |

|                                                                          |     |     |     |  |  |  |     |  |      |
|--------------------------------------------------------------------------|-----|-----|-----|--|--|--|-----|--|------|
| Hôpital de l'Enfant-Jésus, CHU de Québec-Université Laval                | 40  | 99  | 26  |  |  |  |     |  | 165  |
| IUCPQ: Institut universitaire de cardiologie et de pneumologie de Québec | 4   | 5   | 95  |  |  |  |     |  | 104  |
| Lions Gate Hospital                                                      | 294 | 220 |     |  |  |  |     |  | 514  |
| Mount St Joseph's                                                        | 236 |     |     |  |  |  |     |  | 236  |
| Rockyview, Calgary                                                       | 368 | 104 |     |  |  |  |     |  | 472  |
| Saint Paul's Hospital                                                    | 541 |     |     |  |  |  |     |  | 541  |
| Saskatoon City Hospital, Saskatoon                                       | 33  | 53  |     |  |  |  |     |  | 86   |
| Secondary Assessment Centers of Dartmouth General and Halifax Infirmary  | 3   | 70  | 66  |  |  |  |     |  | 139  |
| St Paul's Hospital, Saskatoon                                            | 84  | 198 |     |  |  |  |     |  | 282  |
| Surrey Memorial Hospital                                                 | 404 | 927 |     |  |  |  |     |  | 1331 |
| The Ottawa Hospital - General Campus                                     | 62  | 33  | 135 |  |  |  |     |  | 230  |
| Toronto Western Hospital                                                 |     |     |     |  |  |  | 422 |  | 422  |
| University of Alberta Hospital                                           |     | 303 | 78  |  |  |  |     |  | 381  |

**Appendix Table 2.** Candidate variables for entry into regression model

| Variable                                      | Definition                                                                 | N (%)<br>Missing |
|-----------------------------------------------|----------------------------------------------------------------------------|------------------|
| <b>Demographics</b>                           |                                                                            |                  |
| Age                                           | Age in years                                                               | 0 (0)            |
| Sex                                           | Male, Female, Other                                                        | 0 (0)            |
| Arrival from                                  | Home + other (not clearly documented)                                      | 0 (0)            |
|                                               | Single room + no fixed address + shelter                                   | 0 (0)            |
|                                               | Institutional living: long-term care/rehab + correctional                  | 0 (0)            |
|                                               | Inter-hospital transfer                                                    | 0 (0)            |
| <b>Infection risk</b>                         |                                                                            |                  |
| Travel risk                                   | Travel from country with known cases within 14 days                        | 0 (0)            |
| Institutional exposure                        | Possible exposure in institutional setting (e. g., Long-term care, prison) | 0 (0)            |
| Healthcare worker                             | Healthcare worker/Microbiology lab employee                                | 0 (0)            |
| Household/caregiver contact                   | Household contact /caregiver of known positive case                        | 0 (0)            |
| No documented risk                            | Documented absence of risk factors                                         | 0 (0)            |
| <b>Emergency department variables</b>         |                                                                            |                  |
| ED arrival mode                               |                                                                            | 2 (0)            |
| Ambulance:                                    | arrived by ambulance                                                       |                  |
| Self/police                                   | self-transported or transported to ED by police                            |                  |
| Arrival heart rate                            | beats/minute                                                               | 452 (2.1)        |
| Arrival respiratory rate                      | breaths/minute                                                             | 732 (3.4)        |
| Arrival oxygen saturation                     | %                                                                          | 517 (2.4)        |
| Lowest recorded oxygen saturation in ED       | %                                                                          | 445 (2.0)        |
| Fever                                         |                                                                            | 847 (3.9)        |
| Temperature <36.0                             | Temperature <36.0C AND no self-reported fever                              |                  |
| Temperature 36.0-37.4                         | Temperature 36.0-37.4C AND no self-reported fever                          |                  |
| Temperature ≥37.5 or fever                    | Temperature ≥37.5 OR self-reported fever                                   |                  |
| Respiratory distress                          | Increased work of breathing documented by treating clinician               | 1(0)             |
| Supplemental oxygen delivered in the ED       | Yes/No                                                                     | 0 (0)            |
| <b>COVID symptoms</b>                         |                                                                            |                  |
| Abdominal pain                                | Patient-reported symptom as documented by treating clinician               | 0 (0)            |
| Altered consciousness/confusion               | Patient-reported symptom as documented by treating clinician               | 0 (0)            |
| Bleeding (hemorrhage)                         | Patient-reported symptom as documented by treating clinician               | 0 (0)            |
| Chest pain (includes discomfort or tightness) | Patient-reported symptom as documented by treating clinician               | 0 (0)            |
| Chills                                        | Patient-reported symptom as documented by treating clinician               | 0 (0)            |
| Conjunctivitis                                | Patient-reported symptom as documented by treating clinician               | 0 (0)            |
| Cough                                         | Patient-reported symptom as documented by treating clinician               | 0 (0)            |

|                                              |                                                                                                                                                                    |          |
|----------------------------------------------|--------------------------------------------------------------------------------------------------------------------------------------------------------------------|----------|
| Diarrhea                                     | Patient-reported symptom as documented by treating clinician                                                                                                       | 0 (0)    |
| Dizziness/Vertigo                            | Patient-reported symptom as documented by treating clinician                                                                                                       | 0 (0)    |
| Dysgeusia/anosmia                            | Patient-reported symptom as documented by treating clinician                                                                                                       | 0 (0)    |
| Ear pain                                     | Patient-reported symptom as documented by treating clinician                                                                                                       | 0 (0)    |
| Fatigue/malaise                              | Patient-reported symptom as documented by treating clinician                                                                                                       | 0 (0)    |
| Headache                                     | Patient-reported symptom as documented by treating clinician                                                                                                       | 0 (0)    |
| Hemoptysis (bloody sputum)                   | Patient-reported symptom as documented by treating clinician                                                                                                       | 0 (0)    |
| Joint pain (arthralgia)                      | Patient-reported symptom as documented by treating clinician                                                                                                       | 0 (0)    |
| Lymphadenopathy                              | Patient-reported symptom as documented by treating clinician                                                                                                       | 0 (0)    |
| Muscle aches (myalgia)                       | Patient-reported symptom as documented by treating clinician                                                                                                       | 0 (0)    |
| Nausea/vomiting                              | Patient-reported symptom as documented by treating clinician                                                                                                       | 0 (0)    |
| No reported symptoms                         | Patient-reported symptom as documented by treating clinician                                                                                                       | 0 (0)    |
| Runny nose (rhinorrhea)                      | Patient-reported symptom as documented by treating clinician                                                                                                       | 0 (0)    |
| Seizures                                     | Patient-reported symptom as documented by treating clinician                                                                                                       | 0 (0)    |
| Shortness of breath (dyspnea)                | Patient-reported symptom as documented by treating clinician                                                                                                       | 0 (0)    |
| Skin rash                                    | Patient-reported symptom as documented by treating clinician                                                                                                       | 0 (0)    |
| Sore throat                                  | Patient-reported symptom as documented by treating clinician                                                                                                       | 0 (0)    |
| Sputum production                            | Patient-reported symptom as documented by treating clinician                                                                                                       | 0 (0)    |
| Wheezing                                     | Patient-reported symptom as documented by treating clinician                                                                                                       | 0 (0)    |
| Current tobacco user                         | Documented current tobacco use                                                                                                                                     | 6 (0)    |
| Current illicit user                         | Documented methamphetamine, opioid or other illicit drug use                                                                                                       | 6 (0)    |
| <b>7-day average incident COVID-19 cases</b> | Daily reported incidence of new cases in health region, averaged over the seven days preceding hospital arrival. Reported in units of new cases/100,000 population | 32 (0.1) |



**Appendix Table 3.** Performance metrics for the CCEDRRN COVID-19 Infection Score for ruling in or ruling out SARS-CoV-2 infection at different score cut-off values in the derivation cohort

| Score            | n (%)        | Sensitivity (%,<br>95% CI) | Specificity (%,<br>95% CI) | LR+   | LR-  | COVID+<br>n (%) |
|------------------|--------------|----------------------------|----------------------------|-------|------|-----------------|
| <b>Rule out:</b> |              |                            |                            |       |      |                 |
| ≤-2              | 51 (0.2)     | 100 (99.6–100)             | 0.25 (0.2–0.3)             | 1.0   | NA   | 0 (0)           |
| ≤-1              | 937 (4.3)    | 99.89 (99.4–100)           | 4.5 (4.2–4.8)              | 1.1   | <0.1 | 1 (0.1)         |
| ≤0               | 5996 (27.6)  | 96.6 (95.2–97.7)           | 28.67 (28.1–29.3)          | 1.4   | 0.1  | 32 (0.5)        |
| ≤1               | 13114 (60.3) | 86.6 (84.3–88.7)           | 62.43 (61.8–63.1)          | 2.3   | 0.2  | 126 (1.0)       |
| ≤2               | 18041 (83.0) | 67.34 (64.2–70.3)          | 85.25 (84.8–85.7)          | 4.6   | 0.4  | 307 (1.7)       |
| ≤3               | 20405 (93.9) | 45.11 (41.9–48.4)          | 95.61 (95.3–95.9)          | 10.3  | 0.6  | 516 (2.5)       |
| <b>Rule in:</b>  |              |                            |                            |       |      |                 |
| ≥3               | 3702 (17.0)  | 67.34 (64.2–70.3)          | 85.25 (84.8–85.7)          | 4.6   | 0.4  | 633 (17.1)      |
| ≥4               | 1338 (6.2)   | 45.11 (41.9–48.4)          | 95.61 (95.3–95.9)          | 10.3  | 0.6  | 424 (31.7)      |
| ≥5               | 440 (2.0)    | 23.51 (20.8–26.4)          | 98.95 (98.8–99.1)          | 22.3  | 0.8  | 221 (50.2)      |
| ≥6               | 122 (0.6)    | 9.68 (7.9–11.8)            | 99.85 (99.8–99.9)          | 65.0  | 0.9  | 91 (74.6)       |
| ≥7               | 31 (0.1)     | 2.77 (1.8–4.0)             | 99.98 (99.9–100.0)         | 115.1 | 1.0  | 26 (83.9)       |
| ≥8               | 12 (0.1)     | 1.17 (0.6–2.1)             | 100 (100.0–100.0)          | 243.4 | 1.0  | 11 (91.7)       |
| ≥9               | 2 (<0.1)     | 0.21 (<0.1–0.8)            | 100 (100.0–100.0)          | NA    | 1.0  | 2 (100)         |

LR+: Positive Likelihood Ratio; LR-: Negative Likelihood Ratio

**Appendix Table 4.** Performance metrics for CCEDRRN COVID Infection Score for ruling in or ruling out SARS-CoV-2 infection at different score cut-off values in the combined cohort

| Score cutoff     | n (%)        | Sensitivity (95% CI) | Specificity (95% CI) | LR+   | LR-  | COVID+ n (%) |
|------------------|--------------|----------------------|----------------------|-------|------|--------------|
| <b>Rule out:</b> |              |                      |                      |       |      |              |
| ≤-2              | 70 (0.3)     | 100 (99.7,100)       | 0.3 (0.2,0.3)        | 1     | 0    | 0 (0)        |
| ≤-1              | 1257 (4.5)   | 99.8 (99.4,100)      | 4.7 (4.5,5)          | 1.1   | <0.1 | 2 (0.2)      |
| ≤0               | 7872 (28.5)  | 96.1 (94.8,97.1)     | 29.5 (29.0,30.1)     | 1.4   | 0.1  | 46 (0.6)     |
| ≤1               | 16962 (61.3) | 85 (82.8,87.0)       | 63.4 (62.8,63.9)     | 2.3   | 0.2  | 175 (1.0)    |
| ≤2               | 23243 (84.0) | 64.8 (62.0,67.5)     | 86.2 (85.7,86.6)     | 4.7   | 0.4  | 411 (1.8)    |
| ≤3               | 26169 (94.6) | 40.3 (37.4,43.2)     | 96.1 (95.9,96.4)     | 10.4  | 0.6  | 697 (2.7)    |
| <b>Rule in:</b>  |              |                      |                      |       |      |              |
| ≥3               | 4422 (16.0)  | 64.8 (62.0,67.5)     | 86.2 (85.7,86.6)     | 4.7   | 0.4  | 756 (17.1)   |
| ≥4               | 1496 (5.4)   | 40.3 (37.4,43.2)     | 96.1 (95.9,96.4)     | 10.4  | 0.6  | 470 (31.4)   |
| ≥5               | 476 (1.7)    | 20.2 (18.0,22.6)     | 99.1 (99.0,99.2)     | 22.3  | 0.8  | 236 (49.6)   |
| ≥6               | 128 (0.5)    | 8 (6.5,9.7)          | 99.9 (99.8,99.9)     | 60.3  | 0.9  | 93 (72.7)    |
| ≥7               | 32 (0.1)     | 2.2 (1.5,3.2)        | 100 (100,100)        | 98.4  | 1.0  | 26 (81.3)    |
| ≥8               | 12 (<0.1)    | 0.9 (0.5,1.7)        | 100 (100,100)        | 249.8 | 1.0  | 11 (91.7)    |

LR+: Positive likelihood ratio; LR-: Negative likelihood ratio

**Appendix Table 5.** Performance metrics for the CORC score (race and ethnicity variables removed) for ruling in or ruling out SARS-CoV-2 infection at different score cut-off values in the combined cohort

| Score            | n (%)        | Sensitivity (95% CI) | Specificity (95% CI) | LR+   | LR-  | COVID+<br>n (%) |
|------------------|--------------|----------------------|----------------------|-------|------|-----------------|
| <b>Rule out:</b> |              |                      |                      |       |      |                 |
| ≤-2              | 202 (0.7)    | 99.9 (99.5–100)      | 0.8 (0.7–0.9)        | 1.01  | 0.11 | 1 (0.5)         |
| ≤-1              | 2715 (9.8)   | 97.4 (96.4–98.3)     | 10.1 (9.8–10.5)      | 1.08  | 0.25 | 30 (1.1)        |
| ≤0               | 9089 (32.9)  | 90.1 (88.2–91.7)     | 33.9 (33.3–34.4)     | 1.36  | 0.29 | 116 (1.3)       |
| ≤1               | 17582 (63.9) | 72.8 (70.2–75.4)     | 65.2 (64.6–65.7)     | 2.09  | 0.42 | 317 (1.8)       |
| ≤2               | 23421 (84.7) | 51.2 (48.3–54.1)     | 86.2 (85.8–86.7)     | 3.72  | 0.57 | 569 (2.4)       |
| ≤3               | 26224 (94.8) | 27.7 (25.1–30.3)     | 95.8 (95.5–96)       | 6.56  | 0.76 | 844 (3.2)       |
| <b>Rule in:</b>  |              |                      |                      |       |      |                 |
| ≥3               | 4244 (15.3)  | 51.2 (48.3–54.1)     | 86.2 (85.8–86.7)     | 3.72  | 0.57 | 598<br>(14.1)   |
| ≥4               | 1441 (5.2)   | 27.7 (25.1–30.3)     | 95.8 (95.5–96)       | 6.56  | 0.76 | 323<br>(22.4)   |
| ≥5               | 358 (1.3)    | 11.1 (9.3–13)        | 99.1 (99–99.2)       | 12.79 | 0.9  | 129<br>(36.0)   |
| ≥6               | 54 (0.2)     | 3.1 (2.2–4.2)        | 99.9 (99.9–100)      | 45.41 | 0.97 | 36 (66.7)       |

LR+: Positive likelihood ratio; LR-: Negative likelihood ratio

**Appendix Table 6.** Net Reclassification Improvement of the CCEDRRN COVID-19 Infection Score compared to the CORC Score (race and ethnicity variables removed)

| <b>Primary Outcome : Covid Positive</b> |               |                           |               |             |              |
|-----------------------------------------|---------------|---------------------------|---------------|-------------|--------------|
| <b>CORC risk category</b>               |               | <b>CCIS risk category</b> |               |             | <b>Total</b> |
|                                         |               | <b>Low</b>                | <b>Medium</b> | <b>High</b> |              |
|                                         | <b>Low</b>    | 12                        | 18            | 0           | 30           |
|                                         | <b>Medium</b> | 34                        | 539           | 241         | 814          |
|                                         | <b>High</b>   | 0                         | 94            | 229         | 323          |
|                                         | <b>Total</b>  | 46                        | 651           | 470         | 1167         |
| <b>Primary Outcome: Covid Negative</b>  |               |                           |               |             |              |
| <b>CORC risk category</b>               |               | <b>CCIS risk category</b> |               |             | <b>Total</b> |
|                                         |               | <b>Low</b>                | <b>Medium</b> | <b>High</b> |              |
|                                         | <b>Low</b>    | 1593                      | 1092          | 0           | 2685         |
|                                         | <b>Medium</b> | 6233                      | 15756         | 706         | 22695        |
|                                         | <b>High</b>   | 0                         | 798           | 320         | 1118         |
|                                         | <b>Total</b>  | 7826                      | 17646         | 1026        | 26498        |

| <b><u>COVID Positive</u></b>             |       | <b><u>COVID Negative</u></b>                 |       |
|------------------------------------------|-------|----------------------------------------------|-------|
| Number of outcomes                       | 1167  | Number of outcomes                           | 26498 |
| Correct reclassification                 | 259   | Correct reclassification                     | 7031  |
| Incorrect reclassification               | 128   | Incorrect reclassification                   | 1798  |
| Net reclassification                     | 131   | Net reclassification                         | 5233  |
| Net reclassification improvement (Event) | 0.112 | Net reclassification improvement (Non-event) | 0.197 |
| Total net reclassification improvement   |       |                                              | 0.310 |

Appendix Figure 1. Receiver operating characteristic curves for the CCEDRRN COVID Infection Score (CCIS) and the CORC score (race and ethnicity variables removed) in the combined study cohort

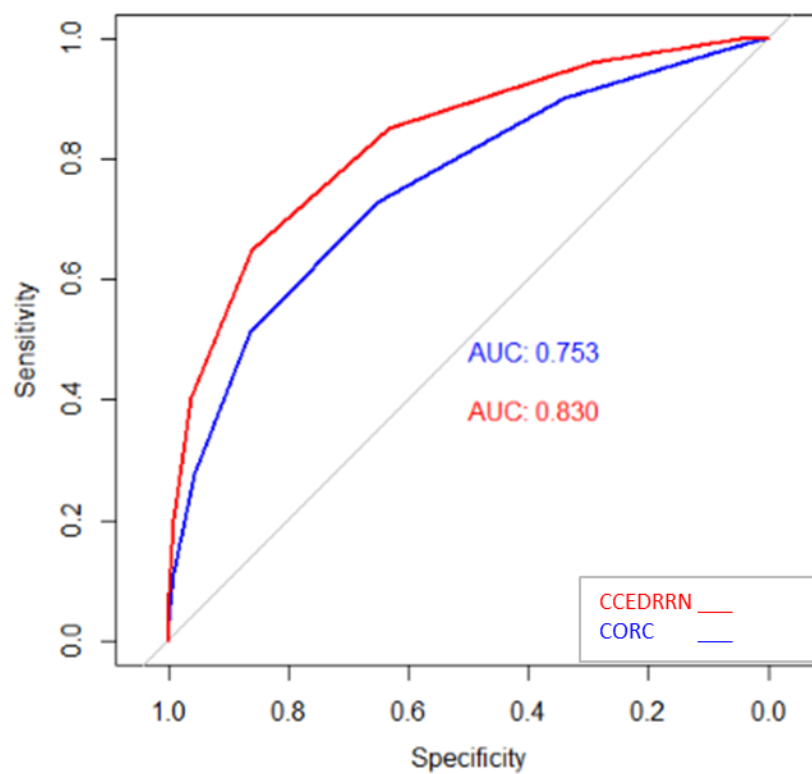

## Supplementary Table: Contributors to the Canadian COVID-19 Emergency Department Rapid Response Network

### 1. Purpose

This supplementary table provides details of the support staff at each of the participating institutions in the Canadian COVID-19 Emergency Department Rapid Response Network. This supplementary document should be attached to each peer-reviewed manuscript after the methods manuscript (M1). The purpose is to ensure research staffs and lead coordinators are appropriately recognized for their contributions to the network.

### 2. List of Support Staff

Table 1. Network coordinating centre staff at the University of British Columbia

| Name              | Roles                | Contributions                                                                                       |
|-------------------|----------------------|-----------------------------------------------------------------------------------------------------|
| Gelareh Ghaderi   | Data analyst         | Data processing and analysis for manuscripts.                                                       |
| Jeffrey Hau       | Data manager         | REDCap, data processing and analysis for manuscripts.                                               |
| Vi Ho             | National coordinator | Coordinate with provincial coordinators and training/onboarding of research assistants.             |
| Joe Larkin        | Project manager      | Project management.                                                                                 |
| Fiona O'Sullivan  | Data analyst         | Data processing and analysis for manuscripts.                                                       |
| Serena Small      | Research coordinator | Ethics & privacy reviews, data management plan, privacy impact assessment, and qualitative analyses |
| Amber Cragg       | Research manager     | Data and manuscript management                                                                      |
| Wei Zhao          | Data analyst         | Data processing and analysis for manuscripts.                                                       |
| Vicky Wu          | Data analyst         | Data processing and analysis for manuscripts.                                                       |
| Elnaz Bodaghkhani | Research associate   | Data and manuscript management                                                                      |

Table 2. Provincial Coordinators

| Name              | Province | Institutional affiliation                                                                                | Contributions to CCEDRRN                                                                        |
|-------------------|----------|----------------------------------------------------------------------------------------------------------|-------------------------------------------------------------------------------------------------|
| Corinne DeMone    | NS       | Dalhousie University, Halifax, Nova Scotia                                                               | Research ethics board submission, manages research assistants, data cleaning and quality.       |
| Jacqueline Fraser | NB       | Dalhousie University, St. John New Brunswick                                                             | Site coordinator as well as research assistant.                                                 |
| Veronique Gélinas | QC       | Centre intégré de santé et de services sociaux de Chaudière-Appalaches (Hôtel-Dieu de Lévis site), Lévis | Provincial research coordinator, translation of research material to French, ethics management. |

|                |    |                                           |                                                                                                  |
|----------------|----|-------------------------------------------|--------------------------------------------------------------------------------------------------|
| Connie Taylor  | ON | Queen's University, Kingston              | Coordination of research assistants in Ontario, maintenance of REB applications for the province |
| Kate Mackenzie | MB | Health Sciences Centre, Winnipeg          | Lead RA for the province                                                                         |
| Aimee Goss     | SK | University of Saskatchewan, Saskatoon     | Screens records in Saskatoon, data/extraction and entry, coordinates research assistants.        |
| Hina Walia     | AB | University of Calgary, Calgary            | Provincial coordinator lead for Alberta, oversight of all Alberta sites.                         |
| Rajan Bola     | BC | University of British Columbia, Vancouver | Provincial coordinator lead for BC, oversight of all BC sites.                                   |

24 Table 3. Institutional research assistant (RA) leads

25 Institutional RA leads are responsible for data extraction and integrity, communication with provincial  
26 leads.

| <b>Name</b>          | <b>Province</b> | <b>Institutional affiliation(s)</b>                                                                                                                                                      |
|----------------------|-----------------|------------------------------------------------------------------------------------------------------------------------------------------------------------------------------------------|
| Corinne DeMone       | NS              | Dartmouth General Hospital, Cobequid Community Health Centre, Hants Community Hospital<br>Secondary Assessment Centers of the Dartmouth General Hospital, and Halifax Infirmary, Halifax |
| Jacqueline Fraser    | NB              | Saint John Regional Hospital, Saint John                                                                                                                                                 |
| Alexandra Nadeau     | QC              | CHU de Québec Université Laval, Quebec City                                                                                                                                              |
| Audrey Nolet         | QC              | Centre intégré de santé et de services sociaux de Chaudière-Appalaches (Hôtel-Dieu de Lévis site), Lévis                                                                                 |
| Xiaoqing Xue         | QC              | Jewish General Hospital, Montréal                                                                                                                                                        |
| David Iannuzzi       | QC              | McGill University Health Center, Montréal                                                                                                                                                |
| Chantal Lanthier     | QC              | Hôpital du Sacré-Cœur de Montréal, Montréal                                                                                                                                              |
| Konika Nirmalanathan | ON              | University Health Network, Toronto                                                                                                                                                       |
| Vlad Latiu           | ON              | Kingston General Hospital, Hotel Dieu Hospital, Kingston                                                                                                                                 |
| Joanna Yeung         | ON              | Sunnybrook Health Sciences Center, Toronto                                                                                                                                               |
| Natasha Clayton      | ON              | Hamilton General Hospital, Juravinski Hospital, Hamilton                                                                                                                                 |
| Tom Chen             | ON              | London Health Sciences Centre, London                                                                                                                                                    |
| Jenna Nichols        | ON              | Health Sciences North, Sudbury                                                                                                                                                           |
| Kate Mackenzie       | MB              | Health Sciences Centre, Winnipeg                                                                                                                                                         |
| Aimee Goss           | SK              | St. Paul's Hospital, Royal University Hospital, Saskatoon City Hospital, Saskatoon                                                                                                       |
| Stacy Ruddell        | AB              | Foothills Medical Centre, Peter Lougheed Centre, Rockyview General Hospital, South Health Campus, Calgary                                                                                |
| Natalie Runham       | AB              | University of Alberta Hospital, Edmonton                                                                                                                                                 |

| Name             | Province | Institutional affiliation(s)                                         |
|------------------|----------|----------------------------------------------------------------------|
| Karlin Su        | AB       | Royal Alexandra Hospital/Northeast Community Health Center, Edmonton |
| Josie Kanu       | BC       | St. Paul's Hospital, Mount Saint Joseph, Vancouver                   |
| Bernice Huynh    | BC       | Abbotsford Regional Hospital and Cancer Center, Abbotsford           |
| Amanda Swirhun   | BC       | Royal Columbian Hospital, New Westminster                            |
| Tracy Taylor     | BC       | Eagle Ridge Hospital and Health Care Centre, Port Moody              |
| Mai Hayashi      | BC       | Royal Inland Hospital, Kamloops                                      |
| Mackenzie Cheyne | BC       | Kelowna General Hospital, Kelowna                                    |
| Sarim Asim       | BC       | Surrey Memorial Hospital, Surrey                                     |
| Katherine Lam    | BC       | Vancouver General Hospital, Vancouver                                |
| Kelsey Compagna  | BC       | Lions Gate Hospital, Vancouver                                       |

Table 4. Contributing Study Sites and Investigators

| Lead Investigator    | Contributing Site / Code                                                     | Member Investigators |
|----------------------|------------------------------------------------------------------------------|----------------------|
| <b>Maritime</b>      |                                                                              |                      |
| Patrick Fok          |                                                                              |                      |
| <b>Nova Scotia</b>   |                                                                              |                      |
| Hana Wiemer          | Halifax Infirmary/ 902                                                       | Patrick Fok          |
|                      | Dartmouth General Hospital/ 903                                              | Hana Wiemer          |
|                      | Hants Community Hospital/ 904                                                | Samuel Campbell      |
|                      | Cobequid Community Health Centre/ 905                                        | Kory Arsenault       |
|                      | Secondary Assessment Centers of Dartmouth General and Halifax Infirmary/ 908 | Tara Dahn            |
| <b>New Brunswick</b> |                                                                              |                      |
| Kavish Chandra       | Saint John Regional Hospital/ 901                                            | Kavish Chandra       |
| <b>Quebec</b>        |                                                                              |                      |
| Patrick Archambault  | Hotel-Dieu de Lévis/ 701                                                     | Patrick Archambault  |
|                      | Jewish General Hospital/ 702                                                 | Joel Turner          |
|                      | Centre Hospitalier de l'Université Laval (CHU de Québec)/ 703                | Éric Mercier         |
|                      | L'hôpital Royal Victoria - Royal Victoria Hospital/ 705                      | Greg Clark           |
|                      | Hôpital de l'Enfant-Jésus, CHU de Québec/ 706                                | Éric Mercier         |
|                      | Hôpital du Saint-Sacrement, CHU de Québec/ 707                               | Éric Mercier         |
|                      | Hôpital Saint-François d'Assise, CHU de Québec/ 708                          | Éric Mercier         |
|                      | Hôtel-Dieu de Québec, CHU de Québec/ 709                                     | Éric Mercier         |



|                                 |                                                                               |                                 |
|---------------------------------|-------------------------------------------------------------------------------|---------------------------------|
|                                 | IUCPQ: Institut universitaire de cardiologie et de pneumologie de Québec/ 710 | Sébastien Robert                |
|                                 | Hôpital du Sacré-Coeur de Montreal/ 711                                       | Raoul Daoust                    |
| <b>Ontario</b>                  |                                                                               |                                 |
| Laurie Morrison & Steven Brooks | Sunnybrook/ 401                                                               | Ivy Cheng                       |
|                                 | The Ottawa Hospital - Civic Campus/ 403                                       | Krishan Yadav                   |
|                                 | The Ottawa Hospital - General Campus/ 404                                     | Krishan Yadav                   |
|                                 | Kingston/Queens/ 406                                                          | Steven Brooks                   |
|                                 | Hamilton General Hospital/ 407                                                | Michelle Welsford               |
|                                 | Health Science North, Sudbury Ontario/ 408                                    | Rob Ohle                        |
|                                 | University Hospital – LHSC/ 409                                               | Justin Yan                      |
|                                 | North York General Hospital, Toronto/ 410                                     | Rohit Mohindra                  |
|                                 | Victoria Hospital – LHSC/ 412                                                 | Justin Yan                      |
|                                 | Toronto Western Hospital/ 414                                                 | Megan Landes                    |
| <b>Manitoba</b>                 |                                                                               |                                 |
| Tomislav Jelic                  | Health Sciences Centre/ 307                                                   | Tomislav Jelic                  |
| <b>Saskatchewan</b>             |                                                                               |                                 |
| Phil Davis                      | Pasqua Hospital, Regina/ 301                                                  | Ankit Kapur                     |
|                                 | Regina General Hospital, Regina/ 302                                          | Ankit Kapur                     |
|                                 | St Paul's Hospital, Saskatoon/ 303                                            | Phil Davis                      |
|                                 | Royal University, Saskatoon/ 304                                              | Phil Davis                      |
|                                 | Saskatoon City Hospital, Saskatoon/ 305                                       | Phil Davis                      |
| <b>Alberta</b>                  |                                                                               |                                 |
| Andrew McRae                    | University of Alberta Hospital, Edmonton/ 201                                 | Brian Rowe                      |
|                                 | Foothills, Calgary/ 202                                                       | Katie Lin                       |
|                                 | Rockyview, Calgary/ 203                                                       | Andrew McRae                    |
|                                 | Peter Lougheed Centre/ 204                                                    | Andrew McRae                    |
|                                 | South Campus, Calgary/ 205                                                    | Stephanie VandenBerg            |
|                                 | Northeast Community Health Centre, Edmonton/ 206                              | Jake Hayward, Jaspreet Khangura |
|                                 | Royal Alexandra Hospital, Edmonton/ 306                                       | Jake Hayward, Jaspreet Khangura |
| <b>British Columbia</b>         |                                                                               |                                 |
| Corinne Hohl                    | Vancouver General Hospital/ 101                                               | Daniel Ting                     |
|                                 | Lions Gate Hospital/ 102                                                      | Maja Stachura                   |
|                                 | Saint Paul's Hospital/ 103                                                    | Frank Scheuermeyer              |

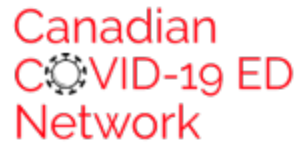

|                                   |                              |
|-----------------------------------|------------------------------|
| Mount St Joseph's/ 104            | Frank Scheuermeyer           |
| Surrey Memorial Hospital/ 105     | Balijeet Braar/ Craig Murray |
| Royal Columbian Hospital/ 106     | John Taylor                  |
| Abbotsford Regional Hospital/ 107 | Ian Martin                   |
| Eagle Ridge Hospital/ 108         | Sean Wormsbecker             |
| Victoria General Hospital/ 109    | Matt Bouchard                |
| Royal Jubilee Hospital/ 110       | Matt Bouchard                |
| Nanaimo General Hospital/ 111     | Matt Bouchard                |
| Royal Inland Hospital/ 112        | Ian Martin                   |
| Kelowna General / Hospital/ 115   | Lee Graham                   |

It was not possible for us to recruit Members from Newfoundland and Labrador, Northwest Territories, Nunavut, Prince Edward Island and Yukon at the time of the inception of the registry.

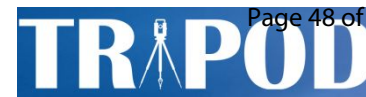

## TRIPOD Checklist: Prediction Model Development and Validation

| Section/Topic                | Item | Checklist Item                                                                                                                                                                                            | Page                      |
|------------------------------|------|-----------------------------------------------------------------------------------------------------------------------------------------------------------------------------------------------------------|---------------------------|
| <b>Title and abstract</b>    |      |                                                                                                                                                                                                           |                           |
| Title                        | 1    | D;V Identify the study as developing and/or validating a multivariable prediction model, the target population, and the outcome to be predicted.                                                          | 1                         |
| Abstract                     | 2    | D;V Provide a summary of objectives, study design, setting, participants, sample size, predictors, outcome, statistical analysis, results, and conclusions.                                               | 2                         |
| <b>Introduction</b>          |      |                                                                                                                                                                                                           |                           |
| Background and objectives    | 3a   | D;V Explain the medical context (including whether diagnostic or prognostic) and rationale for developing or validating the multivariable prediction model, including references to existing models.      | 3                         |
|                              | 3b   | D;V Specify the objectives, including whether the study describes the development or validation of the model or both.                                                                                     | 4                         |
| <b>Methods</b>               |      |                                                                                                                                                                                                           |                           |
| Source of data               | 4a   | D;V Describe the study design or source of data (e.g., randomized trial, cohort, or registry data), separately for the development and validation data sets, if applicable.                               | 4                         |
|                              | 4b   | D;V Specify the key study dates, including start of accrual; end of accrual; and, if applicable, end of follow-up.                                                                                        | Appendix table 2          |
| Participants                 | 5a   | D;V Specify key elements of the study setting (e.g., primary care, secondary care, general population) including number and location of centres.                                                          | 5                         |
|                              | 5b   | D;V Describe eligibility criteria for participants.                                                                                                                                                       | 5                         |
|                              | 5c   | D;V Give details of treatments received, if relevant.                                                                                                                                                     | N/A                       |
| Outcome                      | 6a   | D;V Clearly define the outcome that is predicted by the prediction model, including how and when assessed.                                                                                                | 6                         |
|                              | 6b   | D;V Report any actions to blind assessment of the outcome to be predicted.                                                                                                                                | 5                         |
| Predictors                   | 7a   | D;V Clearly define all predictors used in developing or validating the multivariable prediction model, including how and when they were measured.                                                         | Appendix Table 2          |
|                              | 7b   | D;V Report any actions to blind assessment of predictors for the outcome and other predictors.                                                                                                            | 5                         |
| Sample size                  | 8    | D;V Explain how the study size was arrived at.                                                                                                                                                            | 7                         |
| Missing data                 | 9    | D;V Describe how missing data were handled (e.g., complete-case analysis, single imputation, multiple imputation) with details of any imputation method.                                                  | 7                         |
| Statistical analysis methods | 10a  | D Describe how predictors were handled in the analyses.                                                                                                                                                   | 7                         |
|                              | 10b  | D Specify type of model, all model-building procedures (including any predictor selection), and method for internal validation.                                                                           | 7-8                       |
|                              | 10c  | V For validation, describe how the predictions were calculated.                                                                                                                                           | 9                         |
|                              | 10d  | D;V Specify all measures used to assess model performance and, if relevant, to compare multiple models.                                                                                                   | 8,9                       |
|                              | 10e  | V Describe any model updating (e.g., recalibration) arising from the validation, if done.                                                                                                                 | n/a                       |
| Risk groups                  | 11   | D;V Provide details on how risk groups were created, if done.                                                                                                                                             | 10                        |
| Development vs. validation   | 12   | V For validation, identify any differences from the development data in setting, eligibility criteria, outcome, and predictors.                                                                           | 8                         |
| <b>Results</b>               |      |                                                                                                                                                                                                           |                           |
| Participants                 | 13a  | D;V Describe the flow of participants through the study, including the number of participants with and without the outcome and, if applicable, a summary of the follow-up time. A diagram may be helpful. | Figure 1                  |
|                              | 13b  | D;V Describe the characteristics of the participants (basic demographics, clinical features, available predictors), including the number of participants with missing data for predictors and outcome.    | Table 1, Appendix table 2 |
|                              | 13c  | V For validation, show a comparison with the development data of the distribution of important variables (demographics, predictors and outcome).                                                          | Table 1                   |
| Model development            | 14a  | D Specify the number of participants and outcome events in each analysis.                                                                                                                                 | 10                        |
|                              | 14b  | D If done, report the unadjusted association between each candidate predictor and outcome.                                                                                                                | n/a                       |
| Model specification          | 15a  | D Present the full prediction model to allow predictions for individuals (i.e., all regression coefficients, and model intercept or baseline survival at a given time point).                             | Table 2                   |
|                              | 15b  | D Explain how to use the prediction model.                                                                                                                                                                | Table 2                   |
| Model performance            | 16   | D;V Report performance measures (with CIs) for the prediction model.                                                                                                                                      | 10                        |
| Model-updating               | 17   | V If done, report the results from any model updating (i.e., model specification, model performance).                                                                                                     | n/a                       |
| <b>Discussion</b>            |      |                                                                                                                                                                                                           |                           |
| Limitations                  | 18   | D;V Discuss any limitations of the study (such as nonrepresentative sample, few events per predictor, missing data).                                                                                      | 14                        |
| Interpretation               | 19a  | V For validation, discuss the results with reference to performance in the development data, and any other validation data.                                                                               | 12-13                     |
|                              | 19b  | D;V Give an overall interpretation of the results, considering objectives, limitations, results from similar studies, and other relevant evidence.                                                        | 14                        |
| Implications                 | 20   | D;V Discuss the potential clinical use of the model and implications for future research.                                                                                                                 | 14                        |
| <b>Other information</b>     |      |                                                                                                                                                                                                           |                           |
| Supplementary information    | 21   | D;V Provide information about the availability of supplementary resources, such as study protocol, Web calculator, and data sets.                                                                         | 16                        |

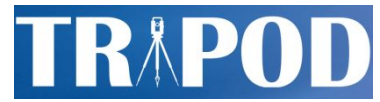

## TRIPOD Checklist: Prediction Model Development and Validation

|         |    |     |                                                                               |   |
|---------|----|-----|-------------------------------------------------------------------------------|---|
| Funding | 22 | D;V | Give the source of funding and the role of the funders for the present study. | 2 |
|---------|----|-----|-------------------------------------------------------------------------------|---|

\*Items relevant only to the development of a prediction model are denoted by D, items relating solely to a validation of a prediction model are denoted by V, and items relating to both are denoted D;V. We recommend using the TRIPOD Checklist in conjunction with the TRIPOD Explanation and Elaboration document.

For peer review only
