# Supplementary material for: CCEDRRN COVID-19 Infection Score (CCIS): development and validation in a Canadian cohort of a clinical risk score to predict SARS-CoV-2 infection in patients presenting to the emergency department with suspected COVID-19
Source: HighWire-hosted journal article supplement (doi:10.1136/bmjopen-2021-055832), 2021-12-01
Supplement: bmjopen-2021-055832supp002_data_supplement.pdf [file bmjopen-2021-055832supp002_data_supplement.pdf]

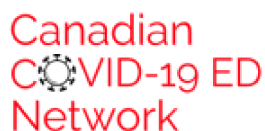

## Supplementary Table: Contributors to the Canadian COVID-19 Emergency Department Rapid Response Network

### 1. Purpose

This supplementary table provides details of the support staff at each of the participating institutions in the Canadian COVID-19 Emergency Department Rapid Response Network. This supplementary document should be attached to each peer-reviewed manuscript after the methods manuscript (M1). The purpose is to ensure research staffs and lead coordinators are appropriately recognized for their contributions to the network.

### 2. List of Support Staff

Table 1. Network coordinating centre staff at the University of British Columbia

| Name              | Roles                | Contributions                                                                                       |
|-------------------|----------------------|-----------------------------------------------------------------------------------------------------|
| Gelareh Ghaderi   | Data analyst         | Data processing and analysis for manuscripts.                                                       |
| Jeffrey Hau       | Data manager         | REDCap, data processing and analysis for manuscripts.                                               |
| Vi Ho             | National coordinator | Coordinate with provincial coordinators and training/onboarding of research assistants.             |
| Joe Larkin        | Project manager      | Project management.                                                                                 |
| Fiona O'Sullivan  | Data analyst         | Data processing and analysis for manuscripts.                                                       |
| Serena Small      | Research coordinator | Ethics & privacy reviews, data management plan, privacy impact assessment, and qualitative analyses |
| Amber Cragg       | Research manager     | Data and manuscript management                                                                      |
| Wei Zhao          | Data analyst         | Data processing and analysis for manuscripts.                                                       |
| Vicky Wu          | Data analyst         | Data processing and analysis for manuscripts.                                                       |
| Elnaz Bodaghkhani | Research associate   | Data and manuscript management                                                                      |

Table 2. Provincial Coordinators

| Name              | Province | Institutional affiliation                                                                                | Contributions to CCEDRRN                                                                        |
|-------------------|----------|----------------------------------------------------------------------------------------------------------|-------------------------------------------------------------------------------------------------|
| Corinne DeMone    | NS       | Dalhousie University, Halifax, Nova Scotia                                                               | Research ethics board submission, manages research assistants, data cleaning and quality.       |
| Jacqueline Fraser | NB       | Dalhousie University, St. John New Brunswick                                                             | Site coordinator as well as research assistant.                                                 |
| Veronique Gélinas | QC       | Centre intégré de santé et de services sociaux de Chaudière-Appalaches (Hôtel-Dieu de Lévis site), Lévis | Provincial research coordinator, translation of research material to French, ethics management. |

Canadian  
COVID-19 ED  
Network

|                |    |                                           |                                                                                                  |
|----------------|----|-------------------------------------------|--------------------------------------------------------------------------------------------------|
| Connie Taylor  | ON | Queen's University, Kingston              | Coordination of research assistants in Ontario, maintenance of REB applications for the province |
| Kate Mackenzie | MB | Health Sciences Centre, Winnipeg          | Lead RA for the province                                                                         |
| Aimee Goss     | SK | University of Saskatchewan, Saskatoon     | Screens records in Saskatoon, data/extraction and entry, coordinates research assistants.        |
| Hina Walia     | AB | University of Calgary, Calgary            | Provincial coordinator lead for Alberta, oversight of all Alberta sites.                         |
| Rajan Bola     | BC | University of British Columbia, Vancouver | Provincial coordinator lead for BC, oversight of all BC sites.                                   |

Table 3. Institutional research assistant (RA) leads

Institutional RA leads are responsible for data extraction and integrity, communication with provincial leads.

| Name                 | Province | Institutional affiliation(s)                                                                                                                                                             |
|----------------------|----------|------------------------------------------------------------------------------------------------------------------------------------------------------------------------------------------|
| Corinne DeMone       | NS       | Dartmouth General Hospital, Cobequid Community Health Centre, Hants Community Hospital<br>Secondary Assessment Centers of the Dartmouth General Hospital, and Halifax Infirmary, Halifax |
| Jacqueline Fraser    | NB       | Saint John Regional Hospital, Saint John                                                                                                                                                 |
| Alexandra Nadeau     | QC       | CHU de Québec Université Laval, Quebec City                                                                                                                                              |
| Audrey Nolet         | QC       | Centre intégré de santé et de services sociaux de Chaudière-Appalaches (Hôtel-Dieu de Lévis site), Lévis                                                                                 |
| Xiaoqing Xue         | QC       | Jewish General Hospital, Montréal                                                                                                                                                        |
| David Iannuzzi       | QC       | McGill University Health Center, Montréal                                                                                                                                                |
| Chantal Lanthier     | QC       | Hôpital du Sacré-Cœur de Montréal, Montréal                                                                                                                                              |
| Konika Nirmalanathan | ON       | University Health Network, Toronto                                                                                                                                                       |
| Vlad Latiu           | ON       | Kingston General Hospital, Hotel Dieu Hospital, Kingston                                                                                                                                 |
| Joanna Yeung         | ON       | Sunnybrook Health Sciences Center, Toronto                                                                                                                                               |
| Natasha Clayton      | ON       | Hamilton General Hospital, Juravinski Hospital, Hamilton                                                                                                                                 |
| Tom Chen             | ON       | London Health Sciences Centre, London                                                                                                                                                    |
| Jenna Nichols        | ON       | Health Sciences North, Sudbury                                                                                                                                                           |
| Kate Mackenzie       | MB       | Health Sciences Centre, Winnipeg                                                                                                                                                         |
| Aimee Goss           | SK       | St. Paul's Hospital, Royal University Hospital, Saskatoon City Hospital, Saskatoon                                                                                                       |
| Stacy Ruddell        | AB       | Foothills Medical Centre, Peter Lougheed Centre, Rockyview General Hospital, South Health Campus, Calgary                                                                                |
| Natalie Runham       | AB       | University of Alberta Hospital, Edmonton                                                                                                                                                 |

Canadian  
COVID-19 ED  
Network

| Name             | Province | Institutional affiliation(s)                                         |
|------------------|----------|----------------------------------------------------------------------|
| Karlin Su        | AB       | Royal Alexandra Hospital/Northeast Community Health Center, Edmonton |
| Josie Kanu       | BC       | St. Paul's Hospital, Mount Saint Joseph, Vancouver                   |
| Bernice Huynh    | BC       | Abbotsford Regional Hospital and Cancer Center, Abbotsford           |
| Amanda Swirhun   | BC       | Royal Columbian Hospital, New Westminster                            |
| Tracy Taylor     | BC       | Eagle Ridge Hospital and Health Care Centre, Port Moody              |
| Mai Hayashi      | BC       | Royal Inland Hospital, Kamloops                                      |
| Mackenzie Cheyne | BC       | Kelowna General Hospital, Kelowna                                    |
| Sarim Asim       | BC       | Surrey Memorial Hospital, Surrey                                     |
| Katherine Lam    | BC       | Vancouver General Hospital, Vancouver                                |
| Kelsey Compagna  | BC       | Lions Gate Hospital, Vancouver                                       |

Table 4. Contributing Study Sites and Investigators

| Lead Investigator    | Contributing Site / Code                                                     | Member Investigators |
|----------------------|------------------------------------------------------------------------------|----------------------|
| <b>Maritime</b>      |                                                                              |                      |
| Patrick Fok          |                                                                              |                      |
| <b>Nova Scotia</b>   |                                                                              |                      |
| Hana Wiemer          | Halifax Infirmary/ 902                                                       | Patrick Fok          |
|                      | Dartmouth General Hospital/ 903                                              | Hana Wiemer          |
|                      | Hants Community Hospital/ 904                                                | Samuel Campbell      |
|                      | Cobequid Community Health Centre/ 905                                        | Kory Arsenaault      |
|                      | Secondary Assessment Centers of Dartmouth General and Halifax Infirmary/ 908 | Tara Dahn            |
| <b>New Brunswick</b> |                                                                              |                      |
| Kavish Chandra       | Saint John Regional Hospital/ 901                                            | Kavish Chandra       |
| <b>Quebec</b>        |                                                                              |                      |
| Patrick Archambault  | Hotel-Dieu de Lévis/ 701                                                     | Patrick Archambault  |
|                      | Jewish General Hospital/ 702                                                 | Joel Turner          |
|                      | Centre Hospitalier de l'Université Laval (CHU de Québec)/ 703                | Éric Mercier         |
|                      | L'hôpital Royal Victoria - Royal Victoria Hospital/ 705                      | Greg Clark           |
|                      | Hôpital de l'Enfant-Jésus, CHU de Québec/ 706                                | Éric Mercier         |
|                      | Hôpital du Saint-Sacrement, CHU de Québec/ 707                               | Éric Mercier         |
|                      | Hôpital Saint-François d'Assise, CHU de Québec/ 708                          | Éric Mercier         |
|                      | Hôtel-Dieu de Québec, CHU de Québec/ 709                                     | Éric Mercier         |

Canadian  
COVID-19 ED  
Network

|                                 |                                                                               |                                         |
|---------------------------------|-------------------------------------------------------------------------------|-----------------------------------------|
|                                 | IUCPQ: Institut universitaire de cardiologie et de pneumologie de Québec/ 710 | Sébastien Robert                        |
|                                 | Hôpital du Sacré-Coeur de Montreal/ 711                                       | Raoul Daoust                            |
| <b>Ontario</b>                  |                                                                               |                                         |
| Laurie Morrison & Steven Brooks | Sunnybrook/ 401                                                               | Ivy Cheng                               |
|                                 | The Ottawa Hospital - Civic Campus/ 403                                       | Krishan Yadav                           |
|                                 | The Ottawa Hospital - General Campus/ 404                                     | Krishan Yadav                           |
|                                 | Kingston/Queens/ 406                                                          | Steven Brooks                           |
|                                 | Hamilton General Hospital/ 407                                                | Michelle Welsford                       |
|                                 | Health Science North, Sudbury Ontario/ 408                                    | Rob Ohle                                |
|                                 | University Hospital – LHSC/ 409                                               | Justin Yan                              |
|                                 | North York General Hospital, Toronto/ 410                                     | Rohit Mohindra                          |
|                                 | Victoria Hospital – LHSC/ 412                                                 | Justin Yan                              |
|                                 | Toronto Western Hospital/ 414                                                 | Megan Landes                            |
| <b>Manitoba</b>                 |                                                                               |                                         |
| Tomislav Jelic                  | Health Sciences Centre/ 307                                                   | Tomislav Jelic                          |
| <b>Saskatchewan</b>             |                                                                               |                                         |
| Phil Davis                      | Pasqua Hospital, Regina/ 301                                                  | Ankit Kapur                             |
|                                 | Regina General Hospital, Regina/ 302                                          | Ankit Kapur                             |
|                                 | St Paul's Hospital, Saskatoon/ 303                                            | Phil Davis                              |
|                                 | Royal University, Saskatoon/ 304                                              | Phil Davis                              |
|                                 | Saskatoon City Hospital, Saskatoon/ 305                                       | Phil Davis                              |
| <b>Alberta</b>                  |                                                                               |                                         |
| Andrew McRae                    | University of Alberta Hospital, Edmonton/ 201                                 | Brian Rowe                              |
|                                 | Foothills, Calgary/ 202                                                       | Katie Lin                               |
|                                 | Rockyview, Calgary/ 203                                                       | Andrew McRae                            |
|                                 | Peter Lougheed Centre/ 204                                                    | Andrew McRae                            |
|                                 | South Campus, Calgary/ 205                                                    | Stephanie VandenBerg                    |
|                                 | Northeast Community Health Centre, Edmonton/ 206                              | Jake Hayward, Jaspreet Khangura         |
|                                 |                                                                               | Royal Alexandra Hospital, Edmonton/ 306 |
| <b>British Columbia</b>         |                                                                               |                                         |
| Corinne Hohl                    | Vancouver General Hospital/ 101                                               | Daniel Ting                             |
|                                 | Lions Gate Hospital/ 102                                                      | Maja Stachura                           |
|                                 | Saint Paul's Hospital/ 103                                                    | Frank Scheuermeyer                      |

Canadian  
COVID-19 ED  
Network

|                                   |                                 |
|-----------------------------------|---------------------------------|
| Mount St Joseph's/ 104            | Frank Scheuermeyer              |
| Surrey Memorial Hospital/ 105     | Balijeet Braar/ Craig<br>Murray |
| Royal Columbian Hospital/ 106     | John Taylor                     |
| Abbotsford Regional Hospital/ 107 | Ian Martin                      |
| Eagle Ridge Hospital/ 108         | Sean Wormsbecker                |
| Victoria General Hospital/ 109    | Matt Bouchard                   |
| Royal Jubilee Hospital/ 110       | Matt Bouchard                   |
| Nanaimo General Hospital/ 111     | Matt Bouchard                   |
| Royal Inland Hospital/ 112        | Ian Martin                      |
| Kelowna General / Hospital/ 115   | Lee Graham                      |

It was not possible for us to recruit Members from Newfoundland and Labrador, Northwest Territories, Nunavut, Prince Edward Island and Yukon at the time of the inception of the registry.
